# Supplementary material for: Picrotoxane Sesquiterpene Glycosides and a Coumarin Derivative from Coriaria nepalensis and Their Neurotrophic Activity
Source: PubMed Central journal article supplement (PMC6273530; doi:10.3390/molecules21101344), 2016-10-12
Supplement: molecules-21-01344-s001.pdf [file molecules-21-01344-s001.pdf]

## Supplementary Material: PicROTOXANE Sesquiterpene Glycosides and Coumarin Derivative from *Coriaria nepalensis* and Their Neurotrophic Activity

Yuan-Yuan Wang, Jun-Mian Tian, Cheng-Chen Zhang, Bo Luo, and Jin-Ming Gao \*

|                                                                                                   |    |
|---------------------------------------------------------------------------------------------------|----|
| Figure S1. <sup>1</sup> H-NMR spectra of compound 1 in CD <sub>3</sub> OD .....                   | 2  |
| Figure S2. <sup>13</sup> C-NMR spectra of compound 1 in CD <sub>3</sub> OD .....                  | 4  |
| Figure S3. HSQC spectra of compound 1 in CD <sub>3</sub> OD .....                                 | 5  |
| Figure S4. <sup>1</sup> H- <sup>1</sup> H COSY spectra of compound 1 in CD <sub>3</sub> OD .....  | 6  |
| Figure S5. HMBC spectra of compound 1 in CD <sub>3</sub> OD .....                                 | 7  |
| Figure S6. NOESY spectra of compound 1 in CD <sub>3</sub> OD .....                                | 8  |
| Figure S7. HRESIMS spectrum of compound 1.....                                                    | 9  |
| Figure S8. IR spectra of compound 1 .....                                                         | 10 |
| Figure S9. UV spectra of compound 1 .....                                                         | 11 |
| Figure S10. <sup>1</sup> H-NMR spectra of compound 1a in CDCl <sub>3</sub> .....                  | 12 |
| Figure S11. <sup>13</sup> C-NMR spectra of compound 1a in CDCl <sub>3</sub> .....                 | 13 |
| Figure S12. HSQC spectra of compound 1a in CDCl <sub>3</sub> .....                                | 13 |
| Figure S13. <sup>1</sup> H- <sup>1</sup> H COSY spectra of compound 1a in CDCl <sub>3</sub> ..... | 15 |
| Figure S14. HMBC spectra of compound 1a in CDCl <sub>3</sub> .....                                | 16 |
| Figure S15. NOESY spectra of compound 1a in CDCl <sub>3</sub> .....                               | 17 |
| Figure S16. HRESIMS spectrum of compound 1a.....                                                  | 18 |
| Figure S17. IR spectra of compound 1a .....                                                       | 19 |
| Figure S18. UV spectra of compound 1a .....                                                       | 20 |
| Figure S19. <sup>1</sup> H-NMR spectra of compound 2 in CD <sub>3</sub> OD .....                  | 21 |
| Figure S20. <sup>13</sup> C-NMR spectra of compound 2 in CD <sub>3</sub> OD .....                 | 22 |
| Figure S21. HSQC spectra of compound 2 in CD <sub>3</sub> OD .....                                | 23 |
| Figure S22. <sup>1</sup> H- <sup>1</sup> H COSY spectra of compound 2 in CD <sub>3</sub> OD ..... | 24 |
| Figure S23. HMBC spectra of compound 2 in CD <sub>3</sub> OD .....                                | 25 |
| Figure S24. NOESY spectra of compound 2 in CD <sub>3</sub> OD .....                               | 26 |

|                                                                                                                 |    |
|-----------------------------------------------------------------------------------------------------------------|----|
| <b>Figure S25.</b> HRESIMS spectrum of compound <b>2</b> .....                                                  | 27 |
| <b>Figure S26.</b> IR spectra of compound <b>2</b> .....                                                        | 28 |
| <b>Figure S27.</b> UV spectra of compound <b>2</b> .....                                                        | 29 |
| <b>Figure S28.</b> <sup>1</sup> H-NMR spectra of compound <b>3</b> in CDCl <sub>3</sub> .....                   | 30 |
| <b>Figure S29.</b> <sup>13</sup> C-NMR spectra of compound <b>3</b> in CDCl <sub>3</sub> .....                  | 31 |
| <b>Finger S30.</b> HSQC spectra of compound <b>3</b> in CDCl <sub>3</sub> .....                                 | 32 |
| <b>Finger S31.</b> <sup>1</sup> H- <sup>1</sup> H COSY spectra of compound <b>3</b> in CDCl <sub>3</sub> .....  | 33 |
| <b>Finger S32.</b> HMBC spectra of compound <b>3</b> in CDCl <sub>3</sub> .....                                 | 34 |
| <b>Figure S33.</b> HRESTMS of compound <b>3</b> in CD <sub>3</sub> OD .....                                     | 35 |
| <b>Figure S34.</b> IR spectra of compound <b>3</b> .....                                                        | 36 |
| <b>Figure S35.</b> UV spectra of compound <b>3</b> .....                                                        | 37 |
| <b>Figure S36.</b> <sup>1</sup> H-NMR spectra of compound <b>1b</b> in CDCl <sub>3</sub> .....                  | 38 |
| <b>Figure S37.</b> <sup>1</sup> H-NMR spectra of compound <b>1c</b> in CDCl <sub>3</sub> .....                  | 39 |
| <b>Figure S38.</b> <sup>13</sup> C-NMR spectra of compound <b>1c</b> in CDCl <sub>3</sub> .....                 | 40 |
| <b>Finger S39.</b> HSQC spectra of compound <b>1c</b> in CDCl <sub>3</sub> .....                                | 41 |
| <b>Finger S40.</b> <sup>1</sup> H- <sup>1</sup> H COSY spectra of compound <b>1c</b> in CDCl <sub>3</sub> ..... | 42 |
| <b>Figure S41.</b> HMBC spectra of compound <b>1c</b> in CDCl <sub>3</sub> .....                                | 43 |
| <b>Figure S42.</b> NOESY spectra of compound <b>1c</b> in CDCl <sub>3</sub> .....                               | 44 |
| <b>Figure S43.</b> HRESIMS spectrum of compound <b>1c</b> .....                                                 | 45 |
| <b>Figure S44.</b> <sup>1</sup> H-NMR spectra of compound <b>1d</b> in CDCl <sub>3</sub> .....                  | 46 |
| <b>Figure S45.</b> <sup>13</sup> C-NMR spectra of compound <b>1d</b> in CDCl <sub>3</sub> .....                 | 47 |
| <b>Figure S46.</b> HRESIMS spectrum of compound <b>1d</b> .....                                                 | 48 |
| <b>Figure S47.</b> <sup>1</sup> H-NMR spectra of compound <b>1e</b> in CDCl <sub>3</sub> .....                  | 49 |
| <b>Figure S48.</b> <sup>13</sup> C-NMR spectra of compound <b>1e</b> in CDCl <sub>3</sub> .....                 | 50 |
| <b>Figure S49.</b> HRESIMS spectrum of compound <b>1e</b> .....                                                 | 51 |

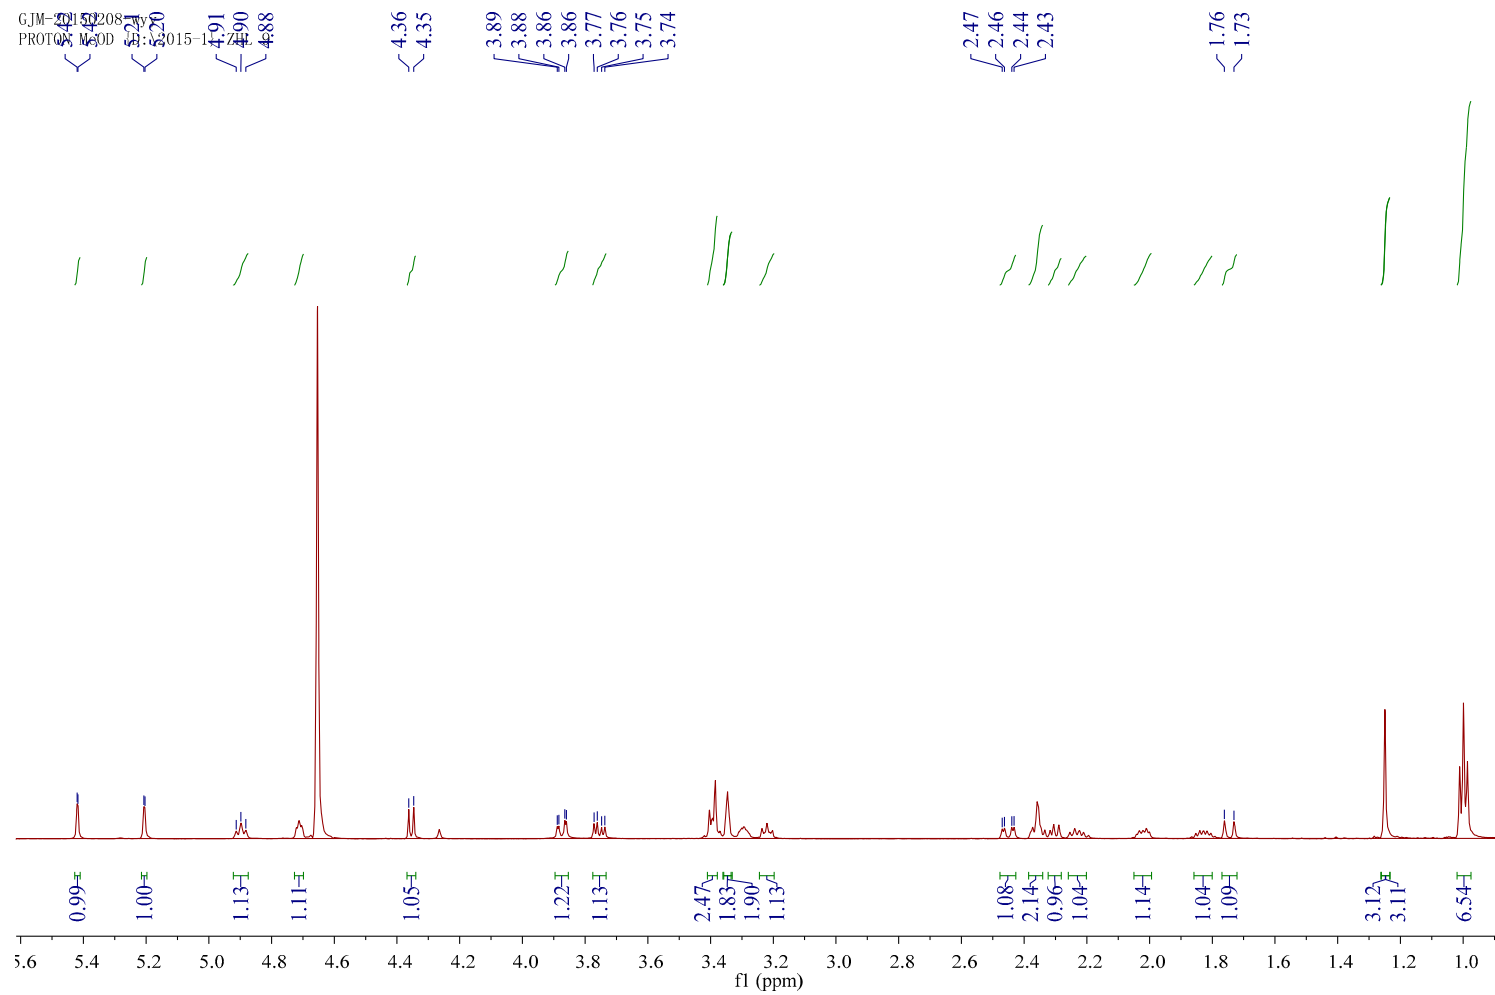

**Figure S1.**  $^1\text{H-NMR}$  spectra of compound **1** in  $\text{CD}_3\text{OD}$ .

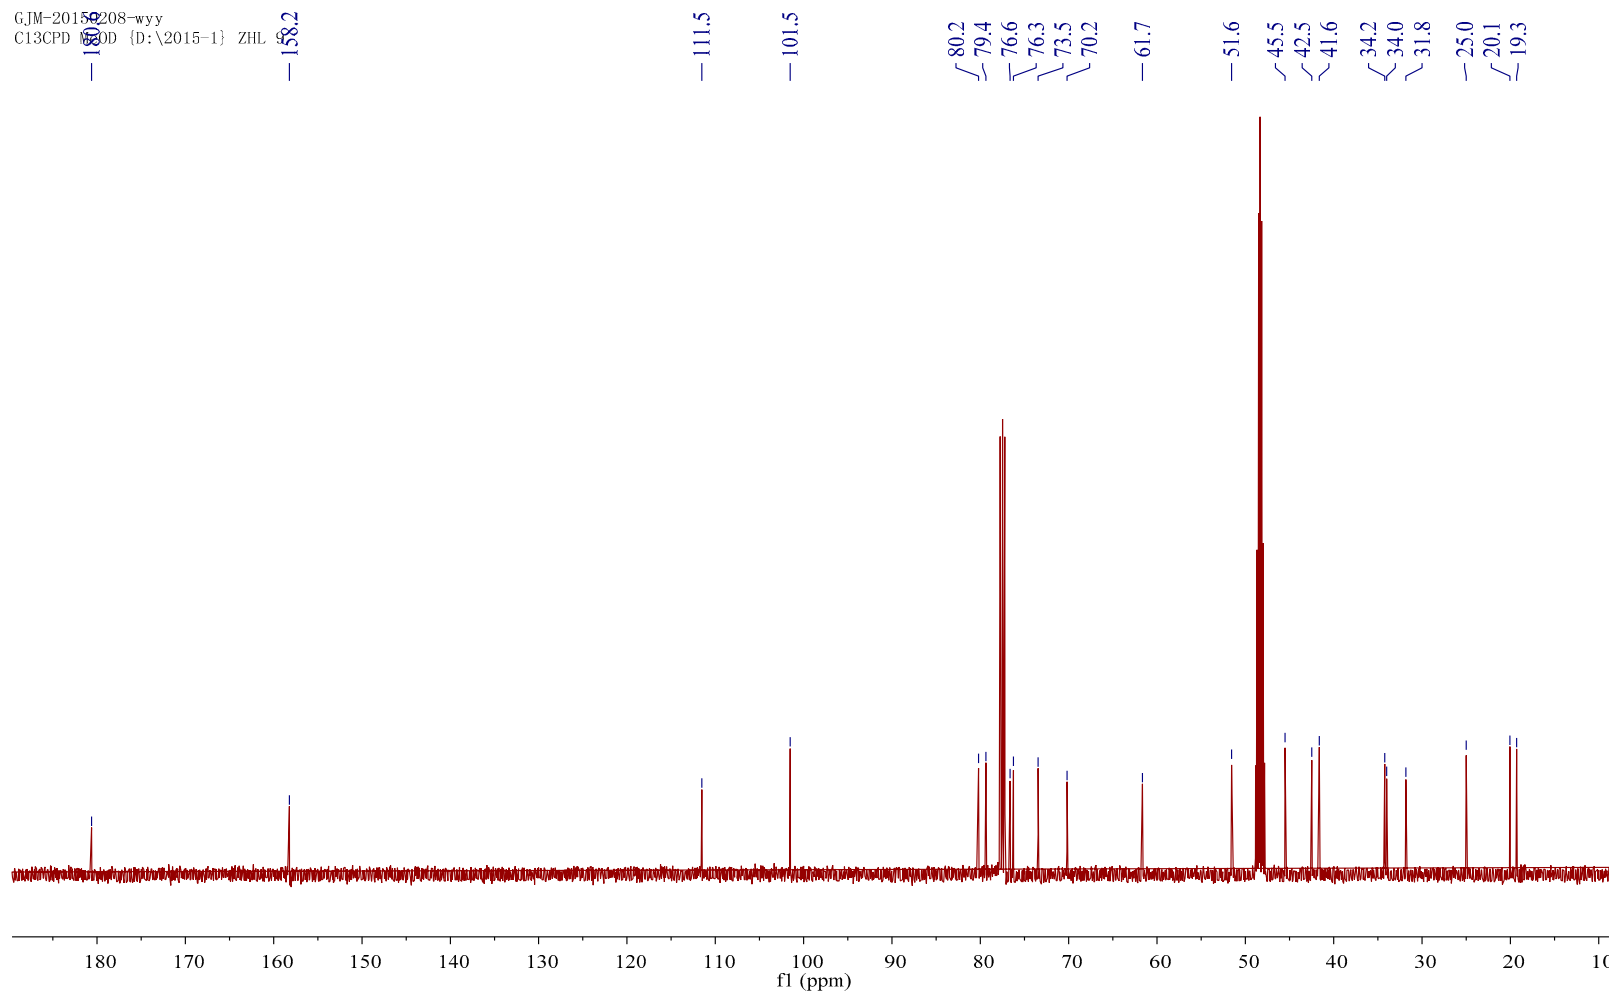

Figure S2.  $^{13}\text{C}$ -NMR spectra of compound **1** in  $\text{CD}_3\text{OD}$ .

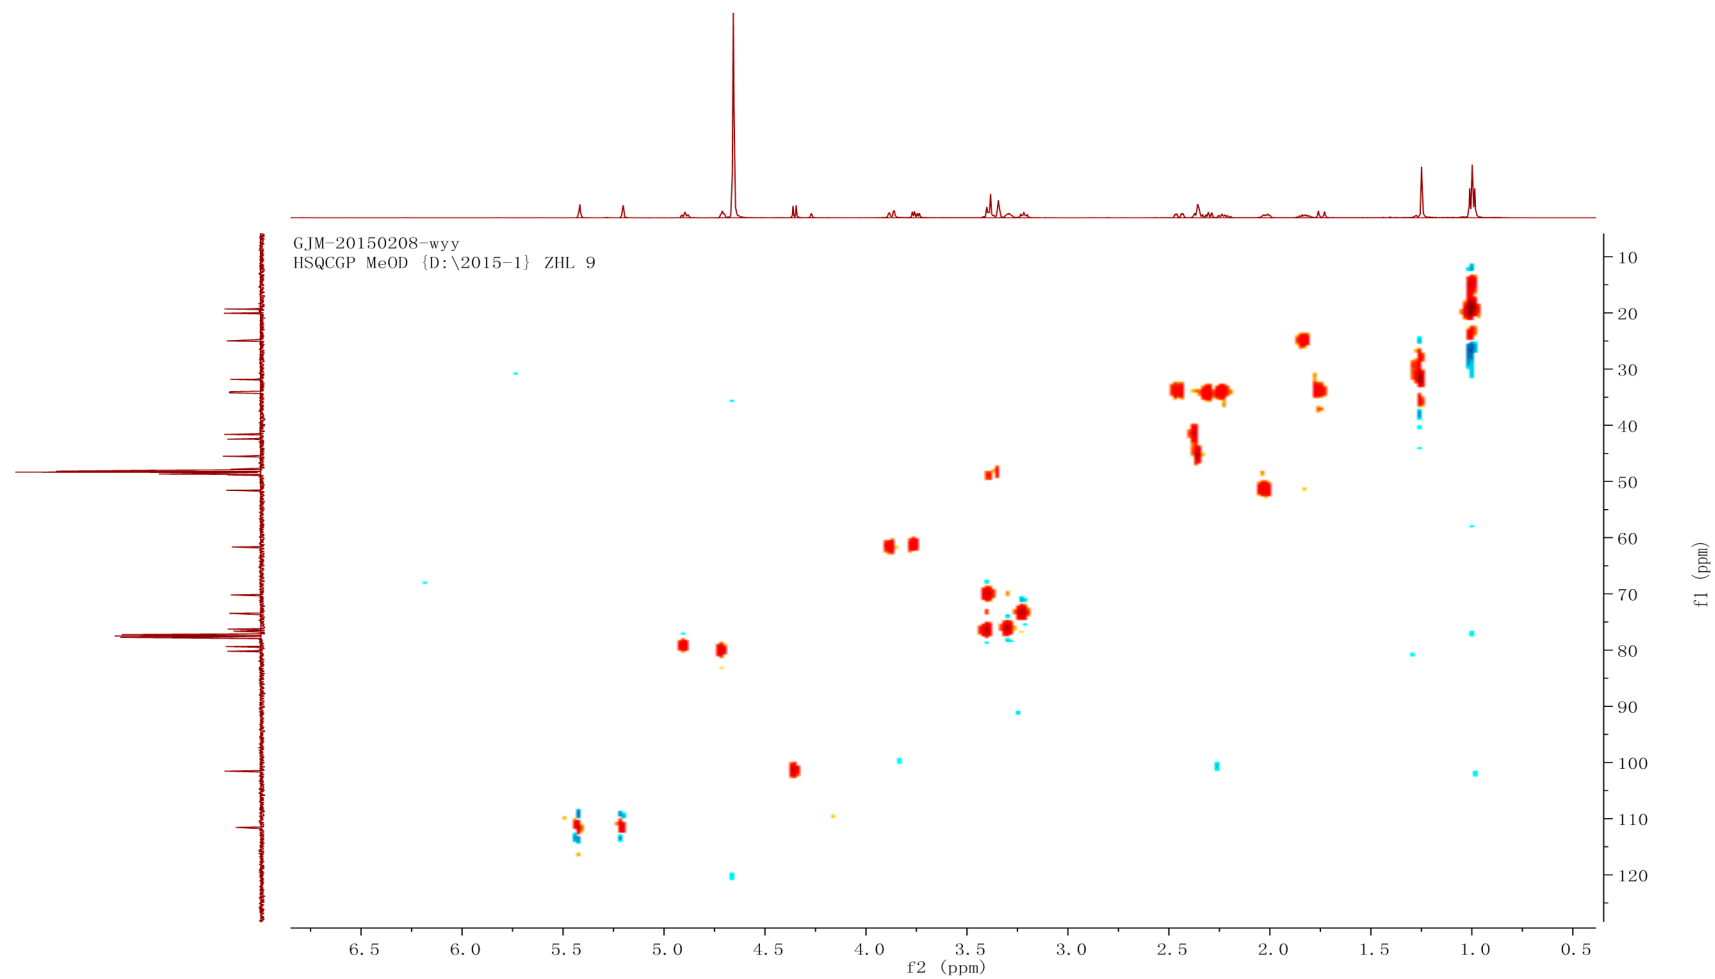

**Figure S3.** HSQC spectra of compound **1** in CD<sub>3</sub>OD.

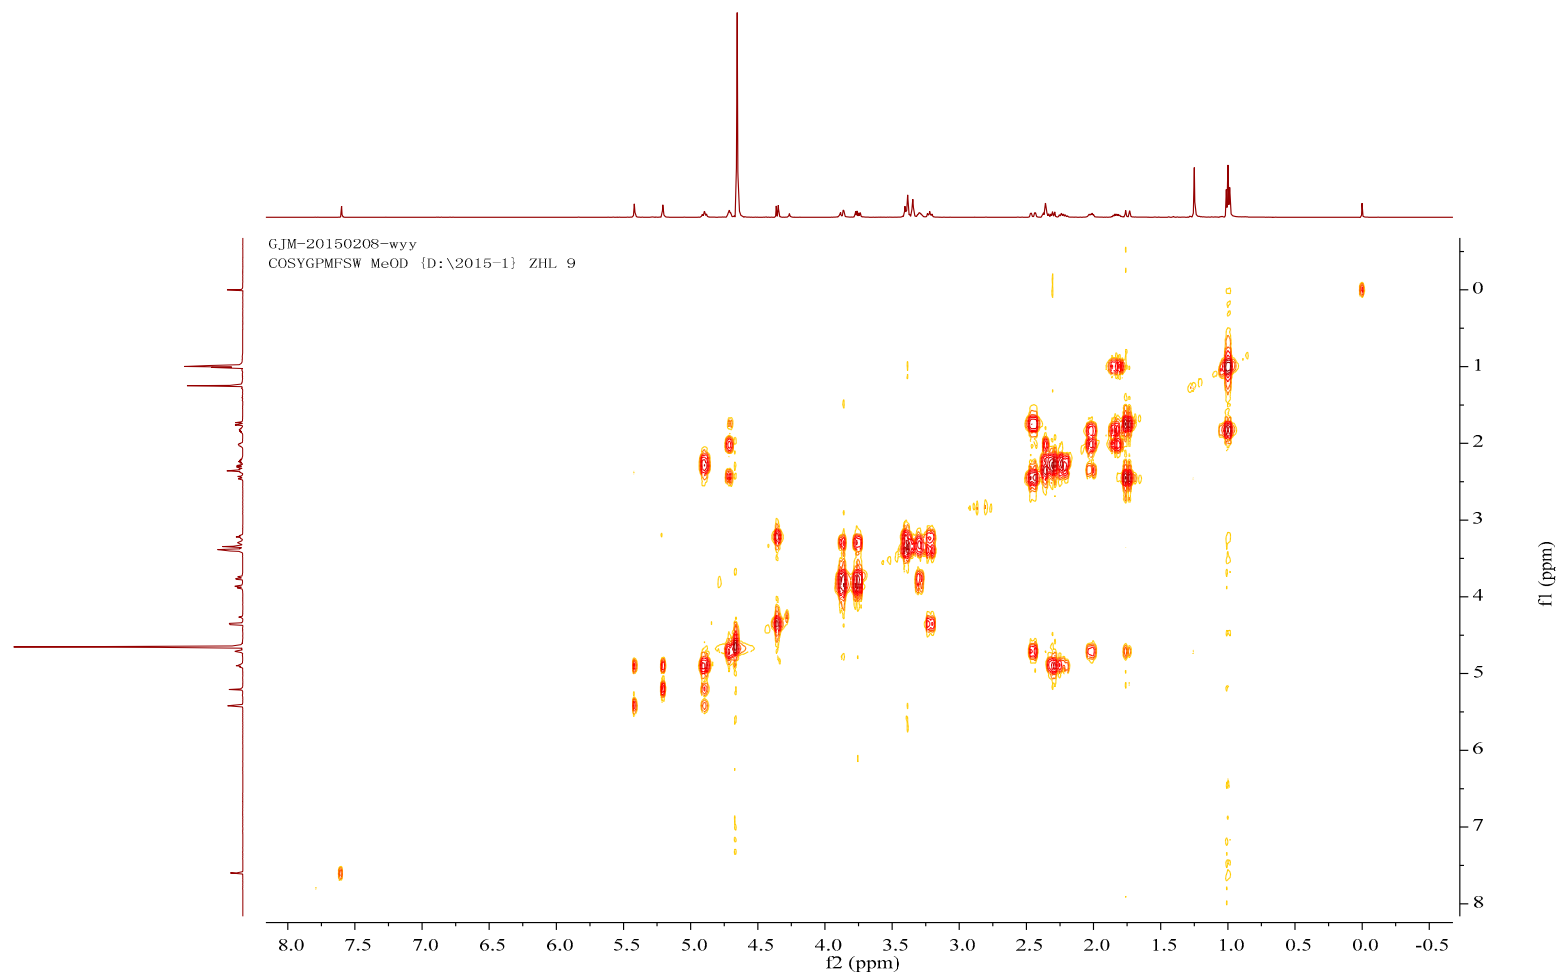

**Figure S4.**  $^1\text{H}$ - $^1\text{H}$  COSY spectra of compound 1 in  $\text{CD}_3\text{OD}$ .

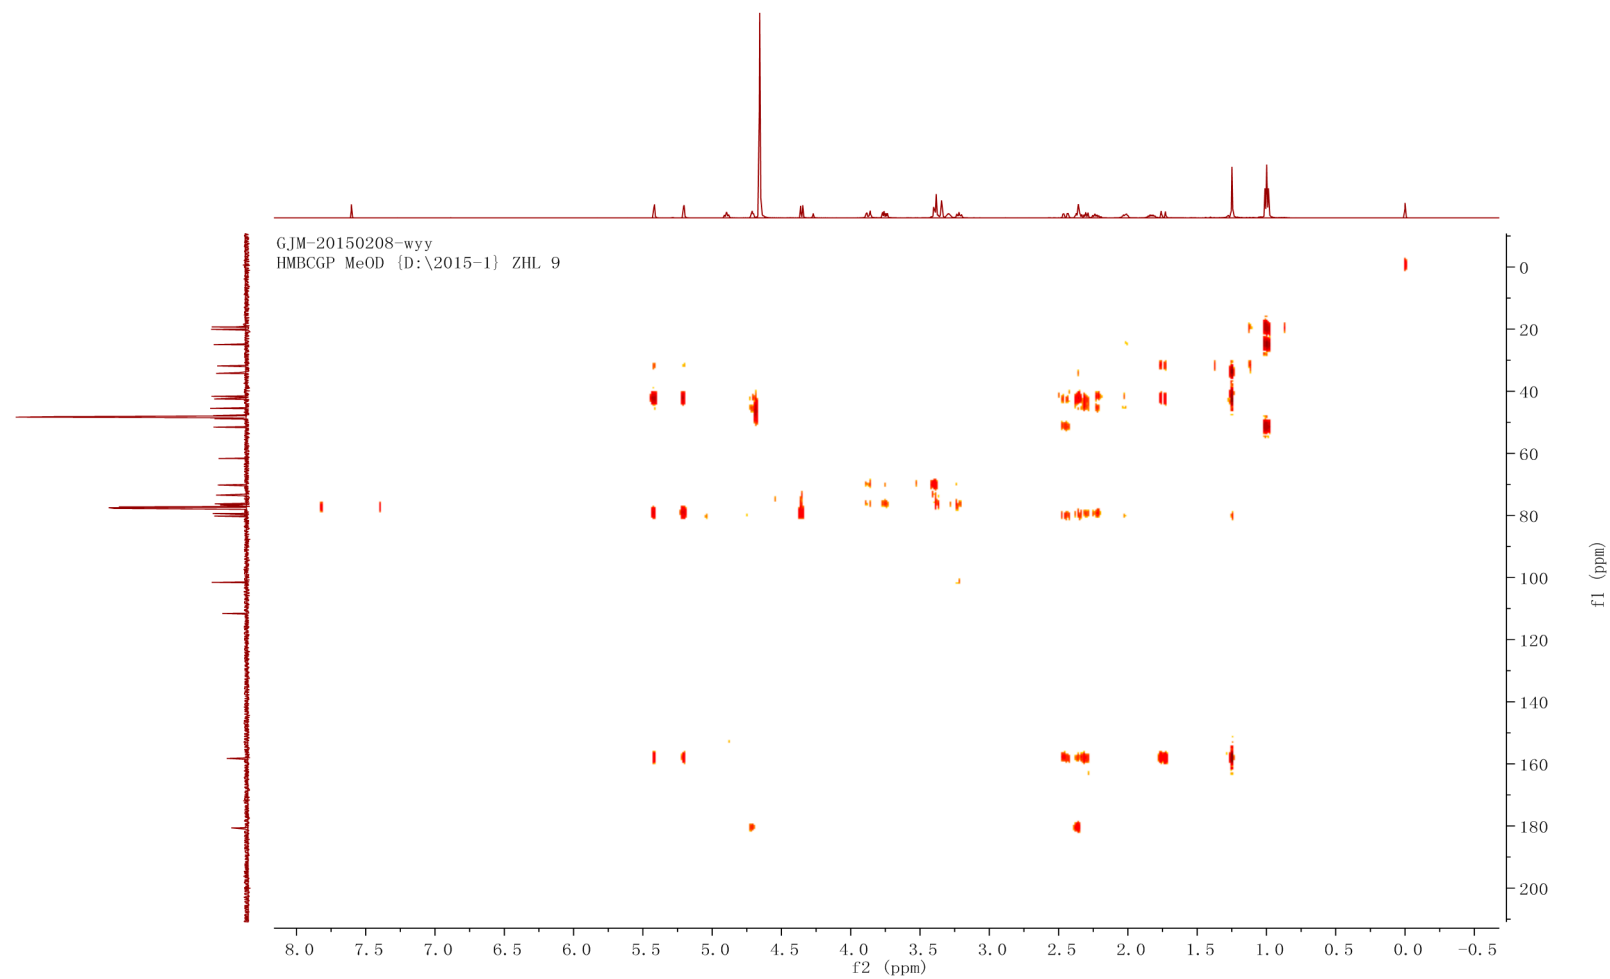

**Figure S5.** HMBC spectra of compound **1** in CD<sub>3</sub>OD.

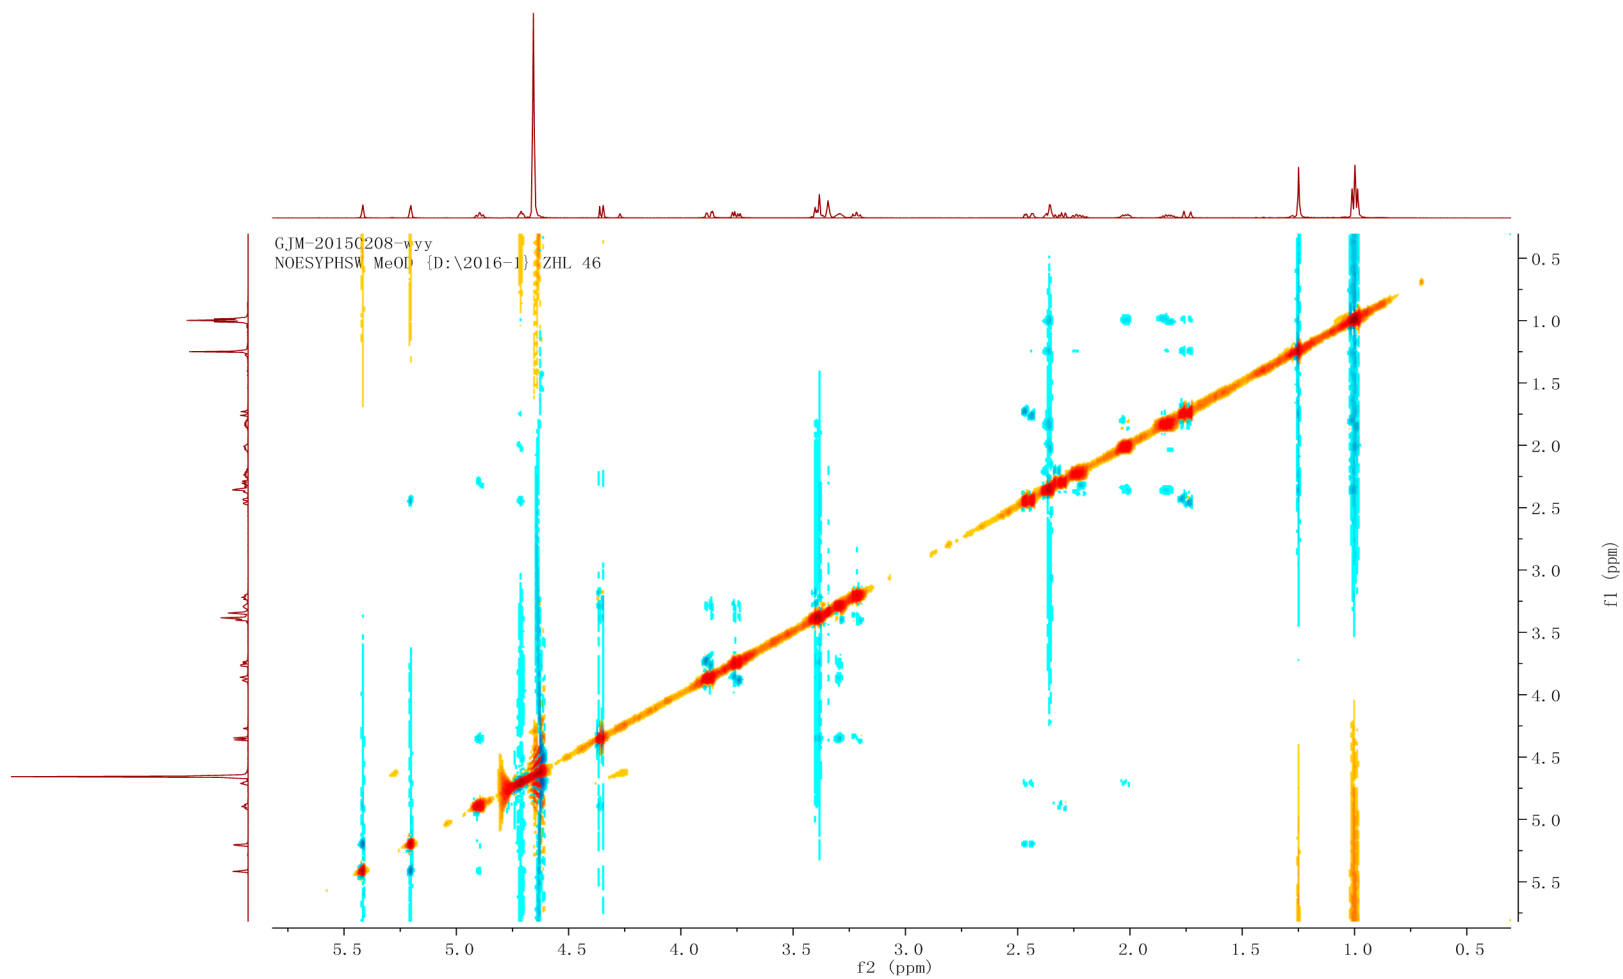

**Figure S6.** NOESY spectra of compound **1** in CD<sub>3</sub>OD.



## Elemental Composition Report

Page 1

## Single Mass Analysis

Tolerance = 5.0 PPM / DBE: min = -1.5, max = 50.0

Element prediction: Off

Number of isotope peaks used for i-FIT = 3

Monoisotopic Mass, Even Electron Ions

161 formula(e) evaluated with 1 results within limits (up to 50 closest results for each mass)

Elements Used:

C: 5-80 H: 2-120 O: 0-20 Na: 0-1

wyy-1

LCT PXE KE324

14-Oct-2015

13:39:31

1: TOF MS ES+

1.41e+004

wyy-1\_1014 27 (0.583) AM2 (Ar,13500.0,0.00,0.70); ABS; Cm (17:28)

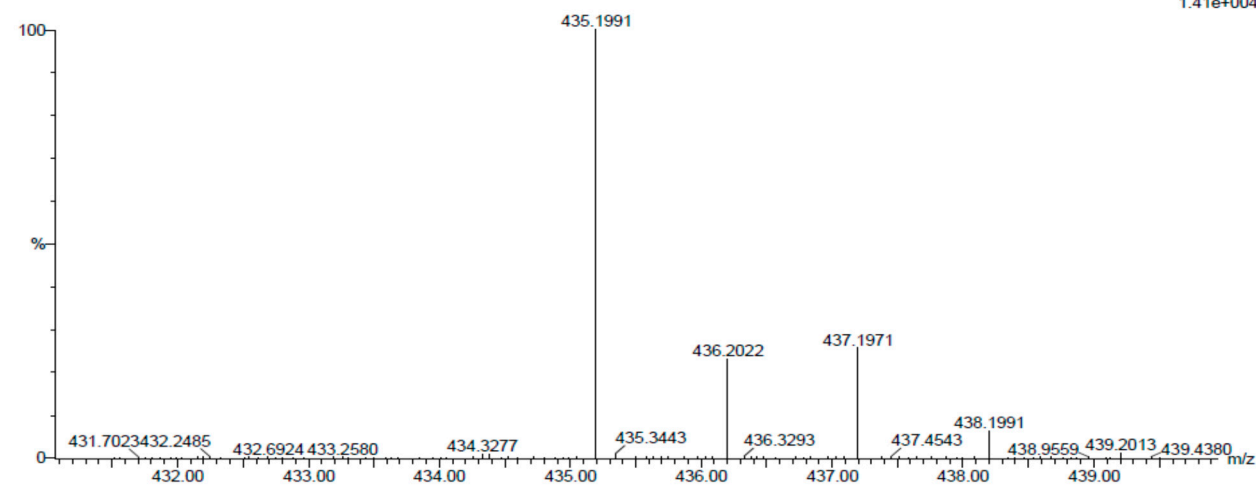

| Mass     | Calc. Mass | mDa  | PPM  | DBE | i-FIT | i-FIT (Norm) | Formula       |
|----------|------------|------|------|-----|-------|--------------|---------------|
| 435.1991 | 435.1995   | -0.4 | -0.9 | 5.5 | 172.3 | 0.0          | C21 H32 O8 Na |

Figure S7. HRESIMS spectrum of compound 1.

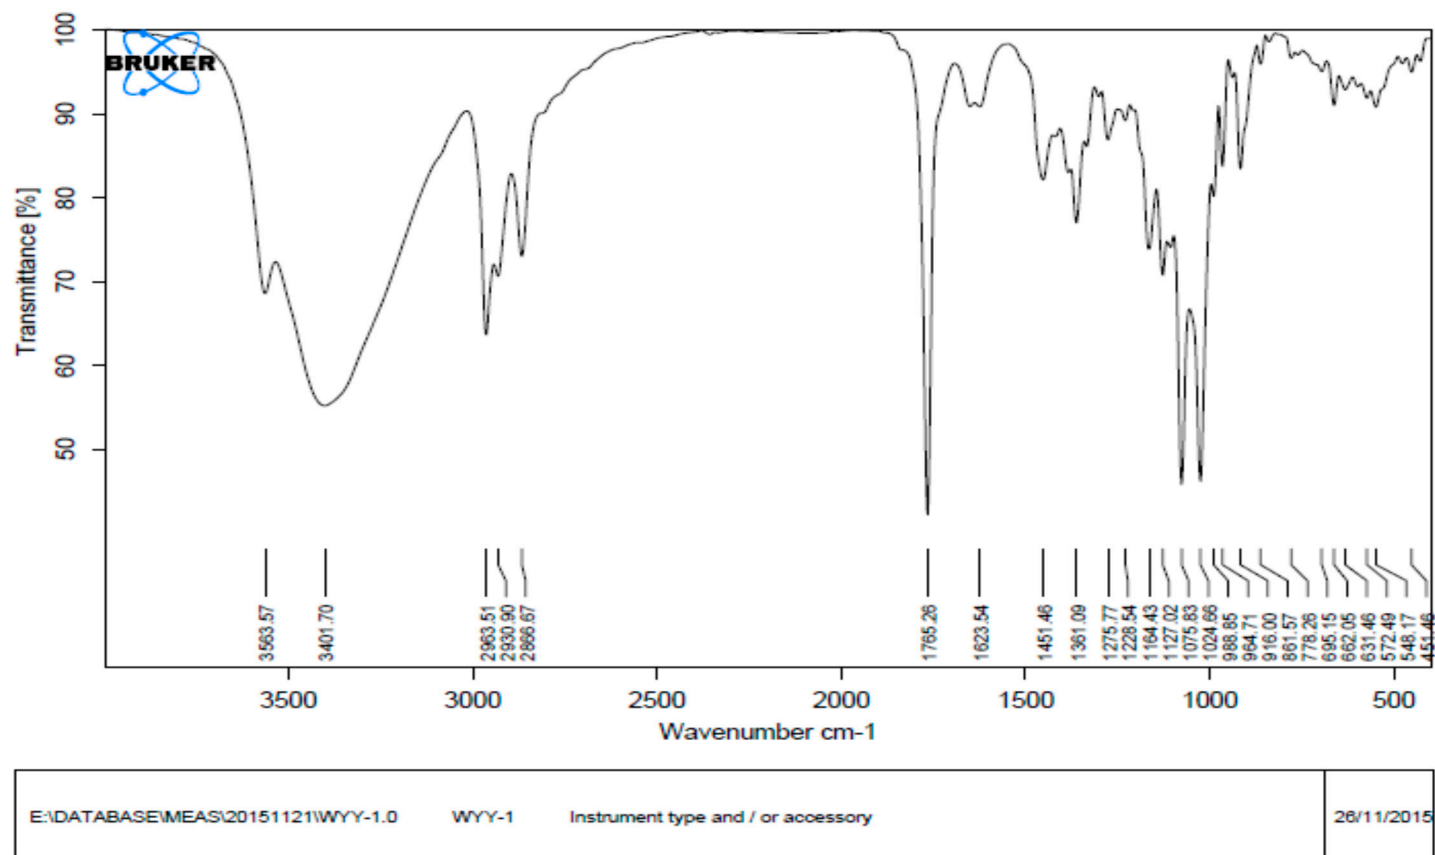

Figure S8. IR spectra of compound 1.

**THERMO ELECTRON ~ VISIONpro SOFTWARE V4.10**

Operator Name (None Entered)  
Department (None Entered)  
Organization (None Entered)  
Information (None Entered)

Date of Report 2015-9-16  
Time of Report 22:33:37下午

**Scan Graph**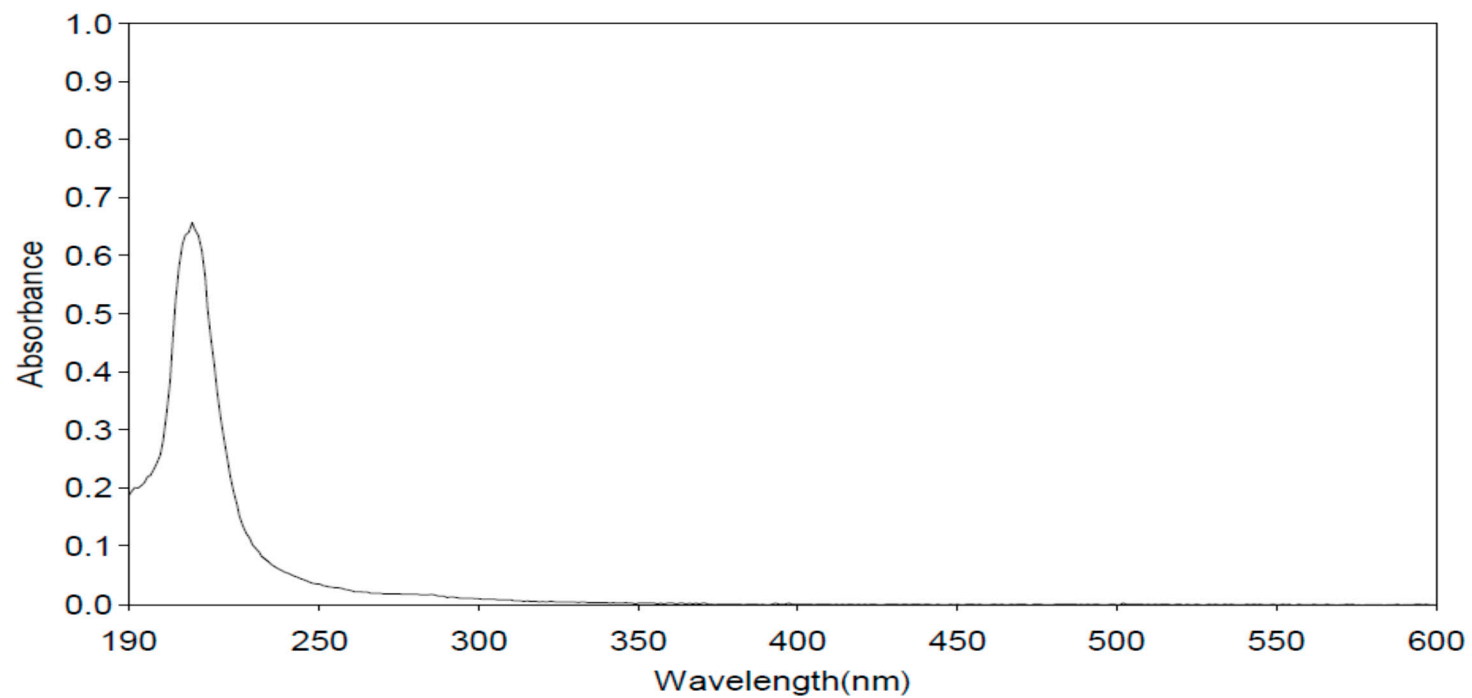

**Figure S9.** UV spectra of compound 1.

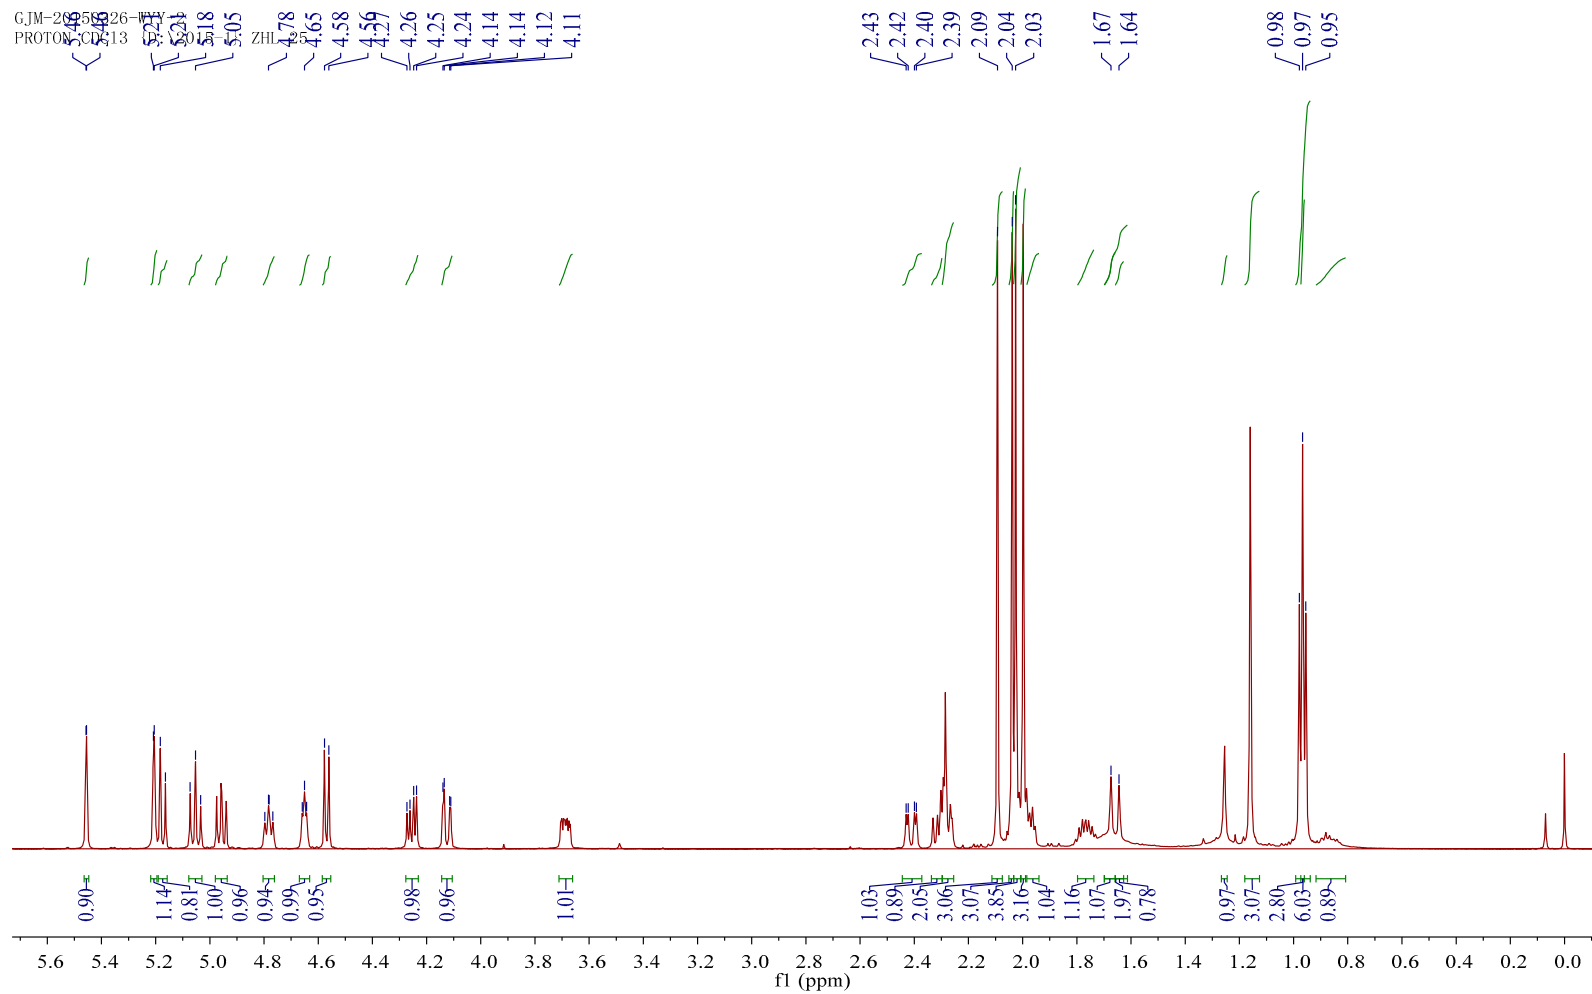

Figure S10. <sup>1</sup>H-NMR spectra of compound **1a** in CDCl<sub>3</sub>.

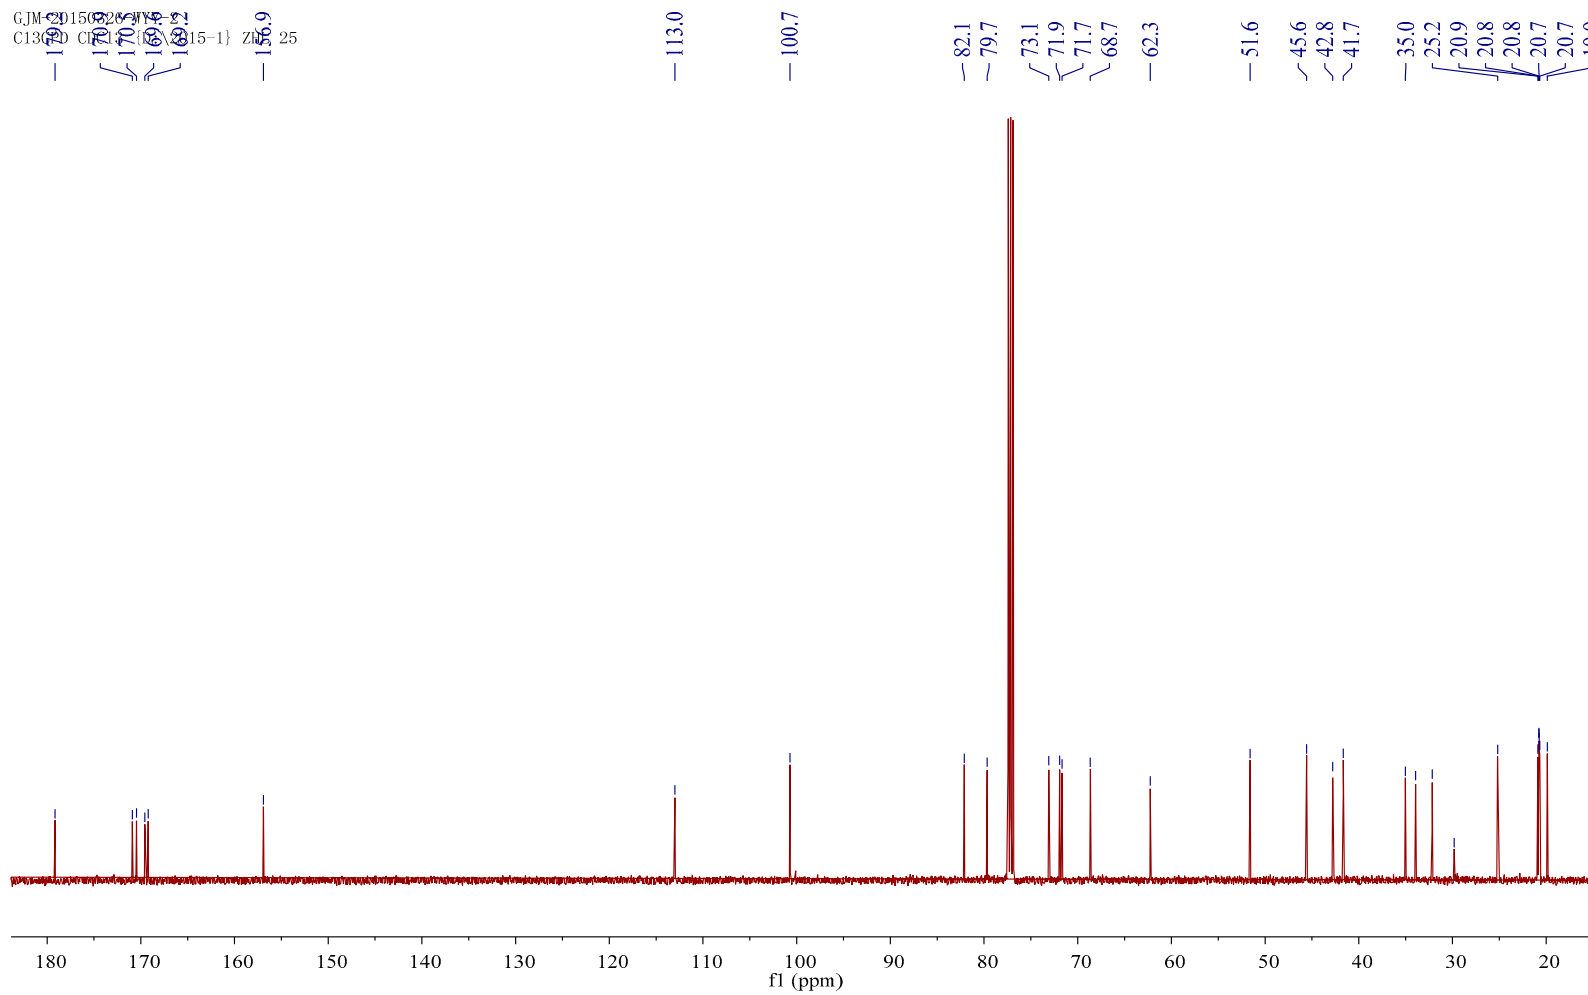

Figure S11. <sup>13</sup>C-NMR spectra of compound **1a** in CDCl<sub>3</sub>.

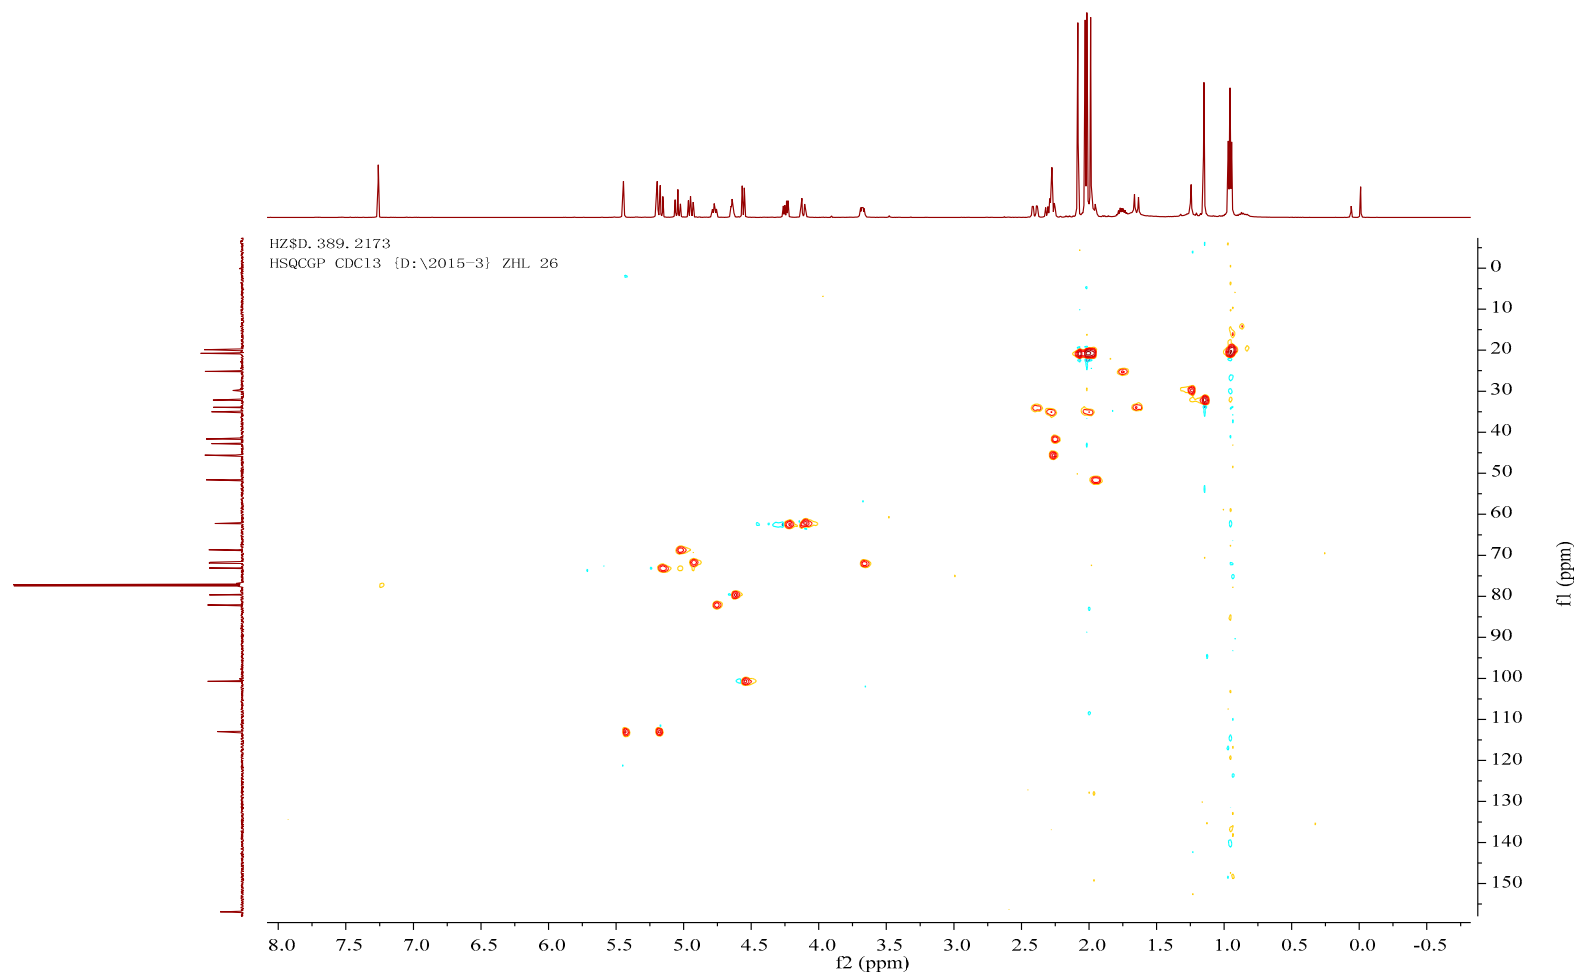

**Figure S12.** HSQC spectra of compound **1a** in CDCl<sub>3</sub>.

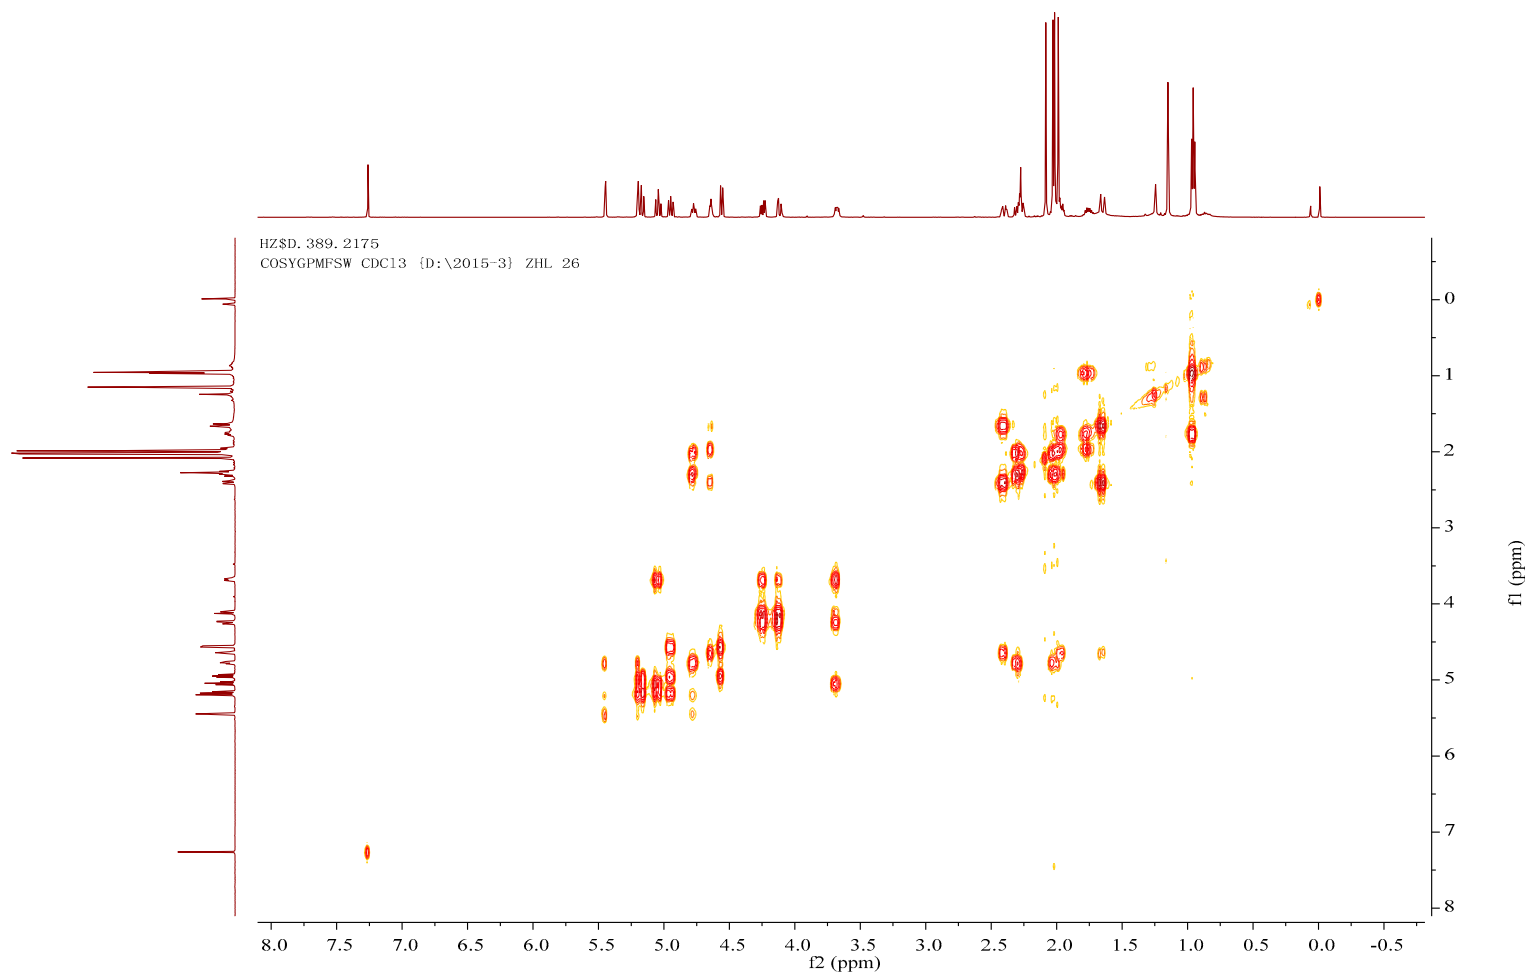

**Figure S13.**  $^1\text{H}$ - $^1\text{H}$  COSY spectra of compound **1a** in  $\text{CDCl}_3$ .

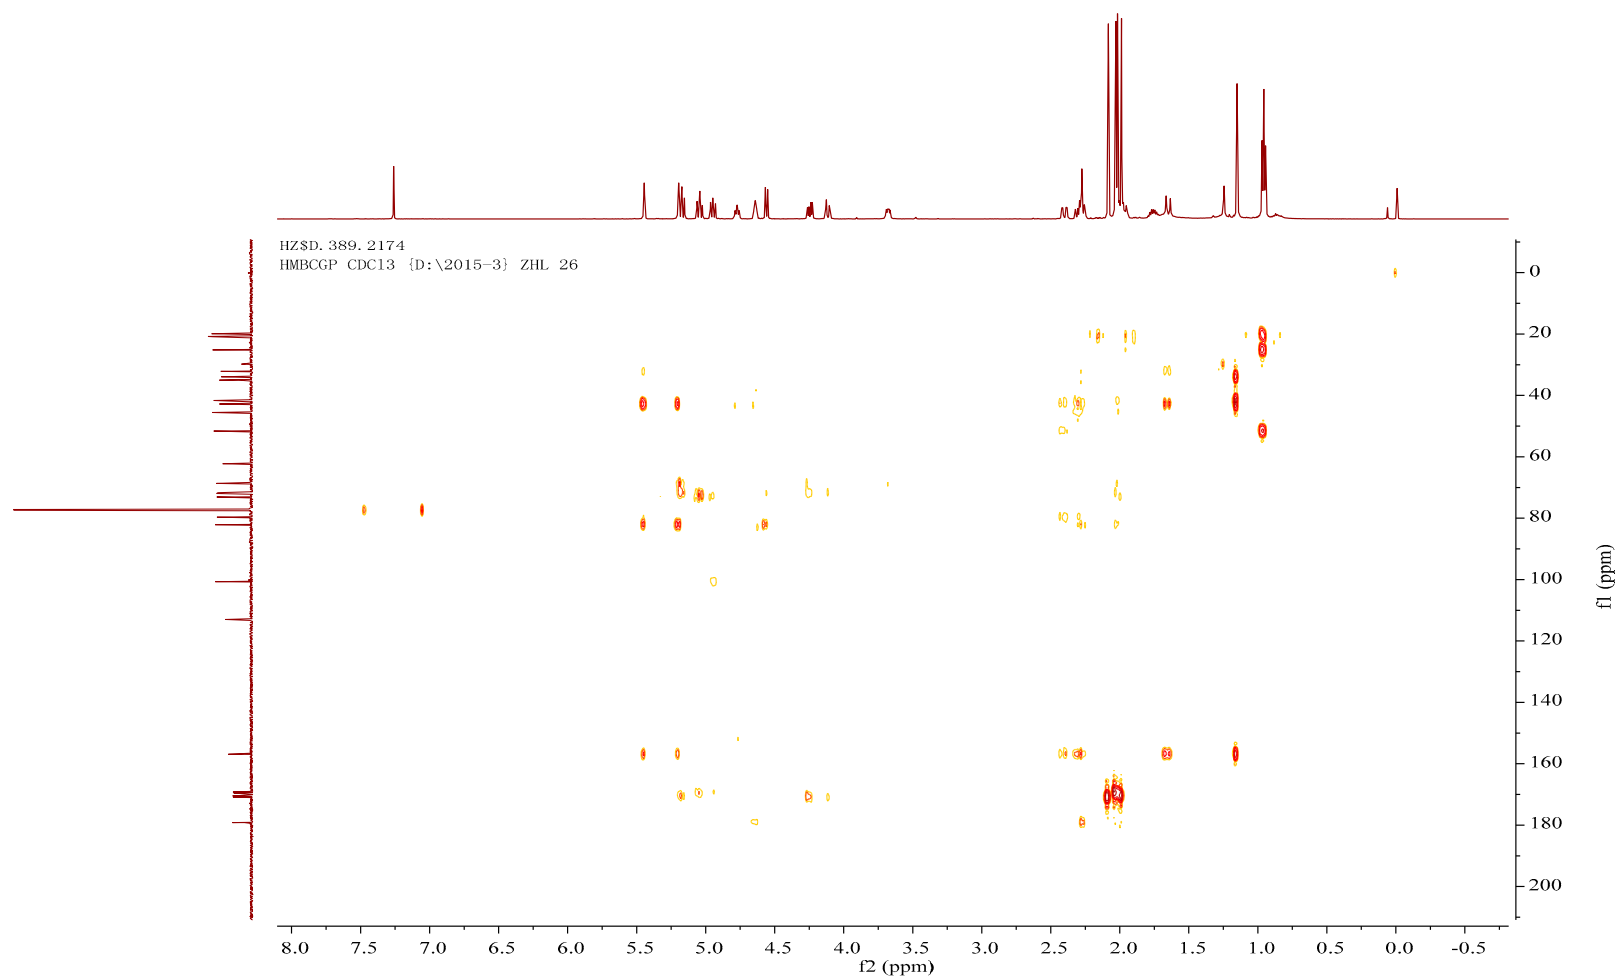

**Figure S14.** HMBC spectra of compound **1a** in CDCl<sub>3</sub>.



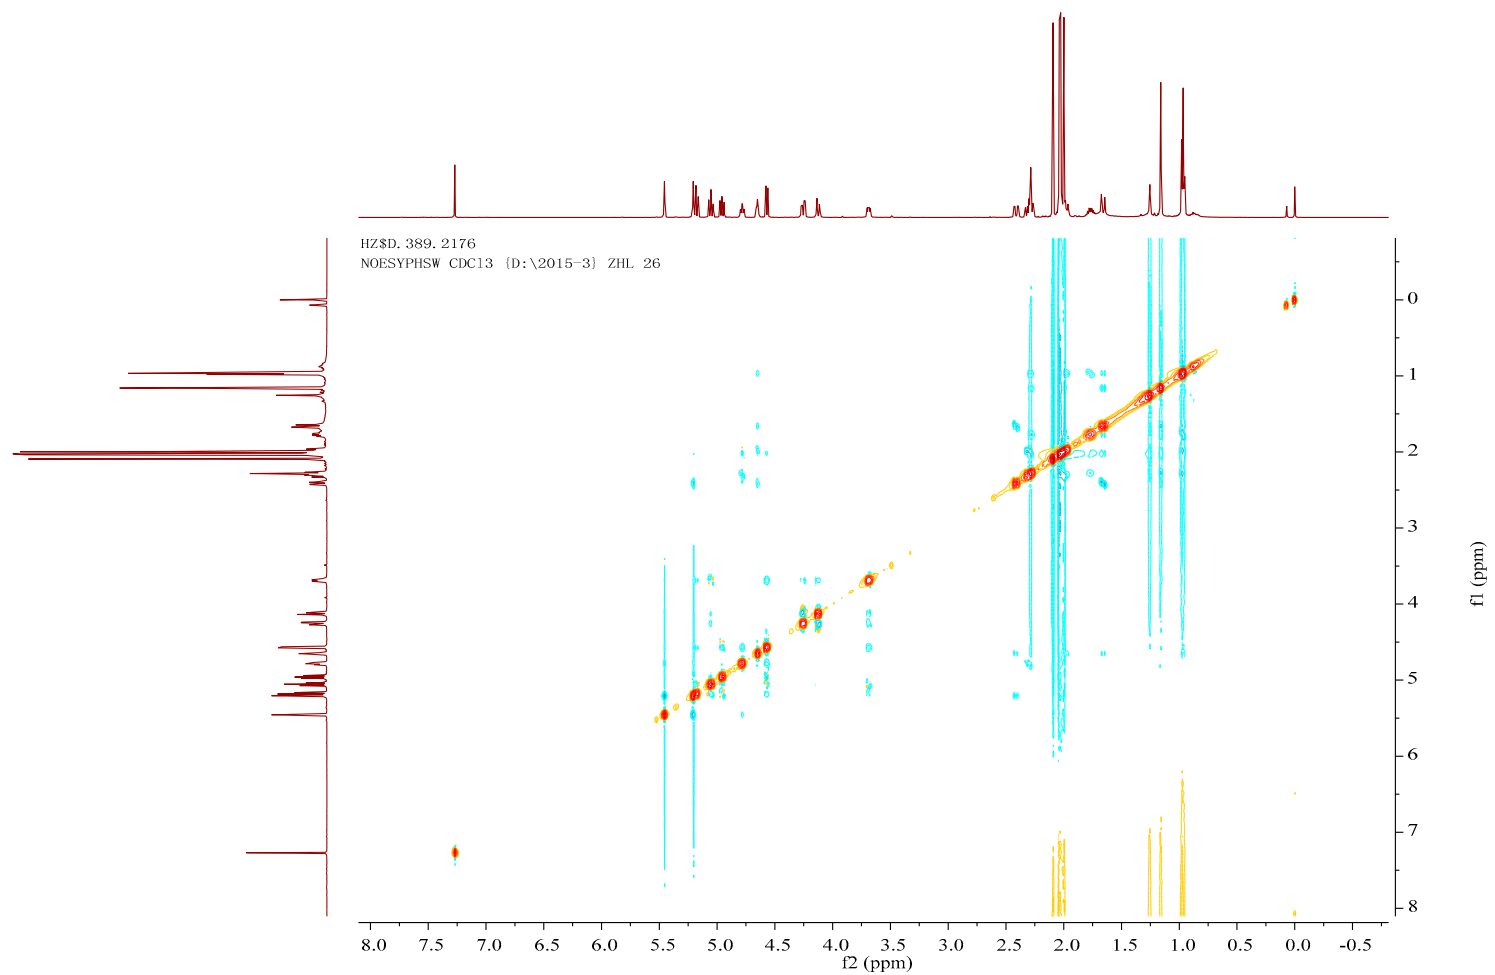

**Figure S15.** NOESY spectra of compound **1a** in CDCl<sub>3</sub>.

## Elemental Composition Report

Page 1

## Single Mass Analysis

Tolerance = 4.0 PPM / DBE: min = -1.5, max = 50.0

Element prediction: Off

Number of isotope peaks used for i-FIT = 3

Monoisotopic Mass, Even Electron Ions

245 formula(e) evaluated with 1 results within limits (up to 50 closest results for each mass)

Elements Used:

C: 5-80 H: 2-120 O: 0-20 Na: 0-1

wy-2

LCT PXE KE324

14-Oct-2015

13:45:16

1: TOF MS ES+

9.22e+003

wy-2\_1014 20 (0.424) AM2 (Ar,10000.0,0.00,1.00); ABS; Cm (9:23)

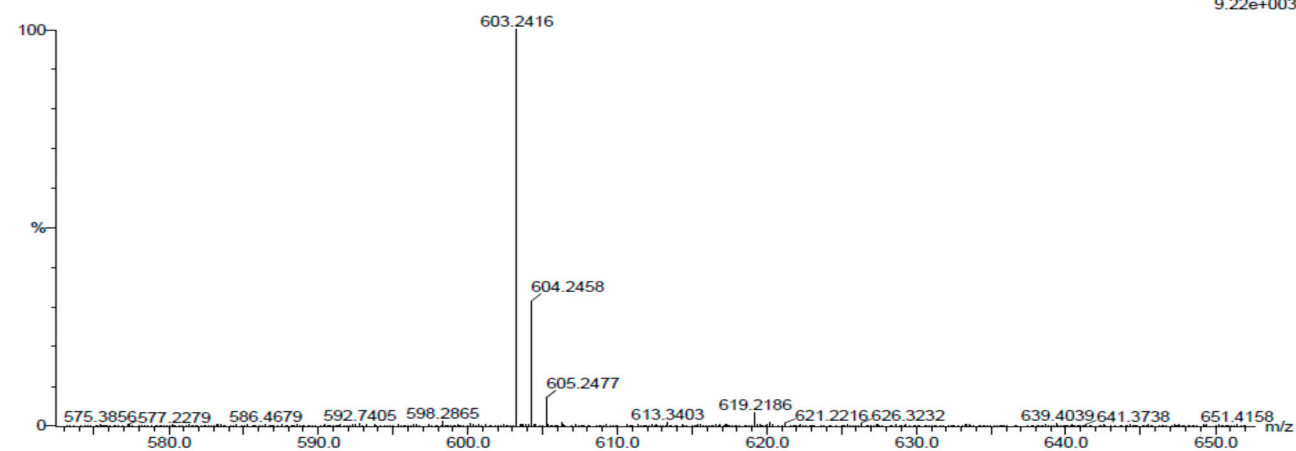

Minimum: -1.5  
Maximum: 50.0

| Mass     | Calc. Mass | mDa  | PPM  | DBE | i-FIT | i-FIT (Norm) | Formula        |
|----------|------------|------|------|-----|-------|--------------|----------------|
| 603.2416 | 603.2417   | -0.1 | -0.2 | 9.5 | 63.4  | 0.0          | C29 H40 O12 Na |

Figure S16. HRESIMS spectrum of compound 1a.

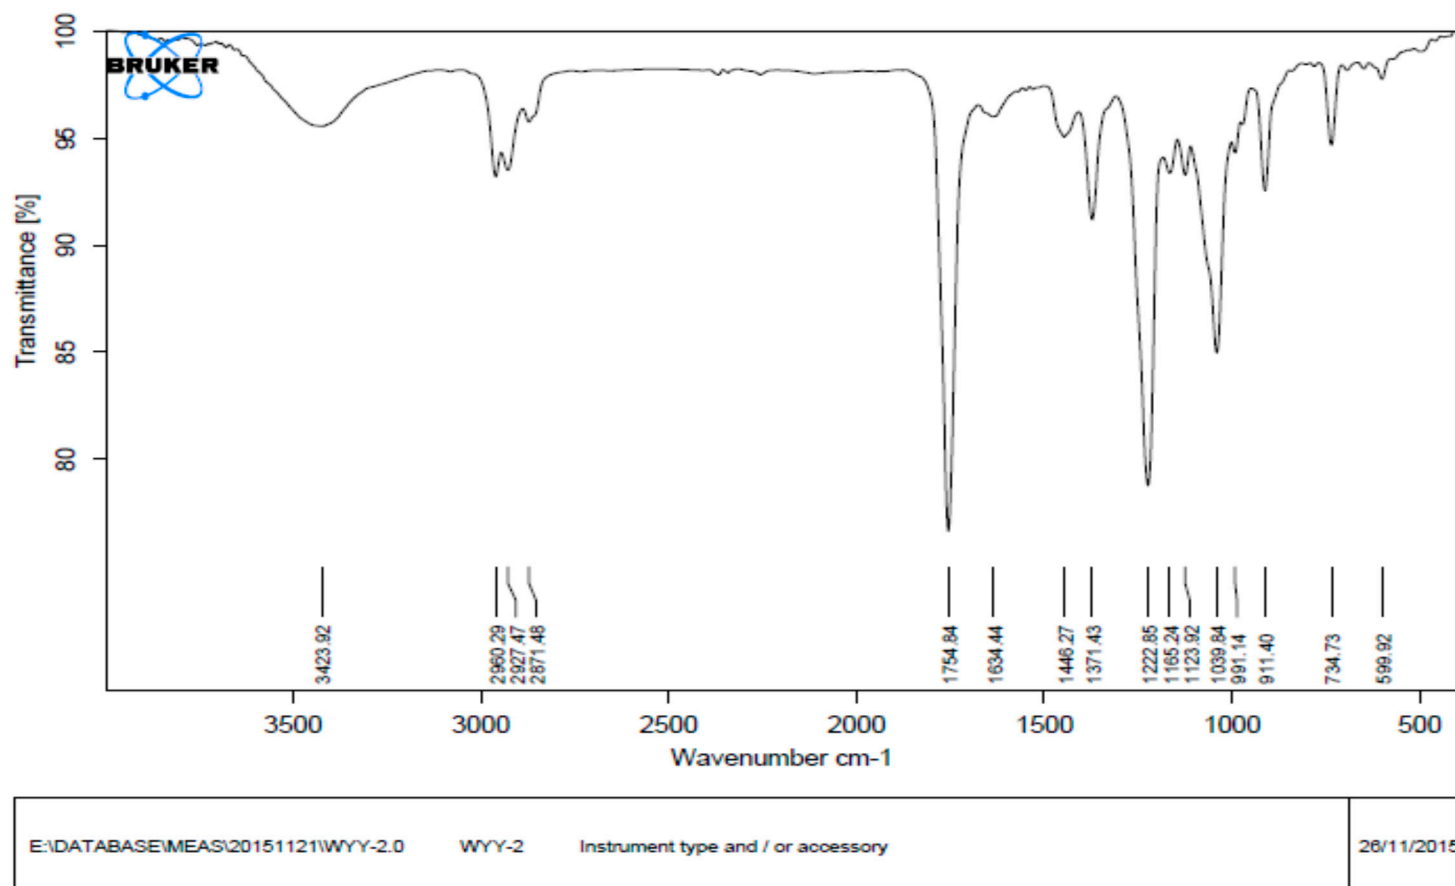

Figure S17. IR spectra of compound 1a.

**THERMO ELECTRON ~ VISIONpro SOFTWARE V4.10**

Operator Name (None Entered)  
Department (None Entered)  
Organization (None Entered)  
Information (None Entered)

Date of Report 2015-9-16  
Time of Report 22:39:59下午

**Scan Graph**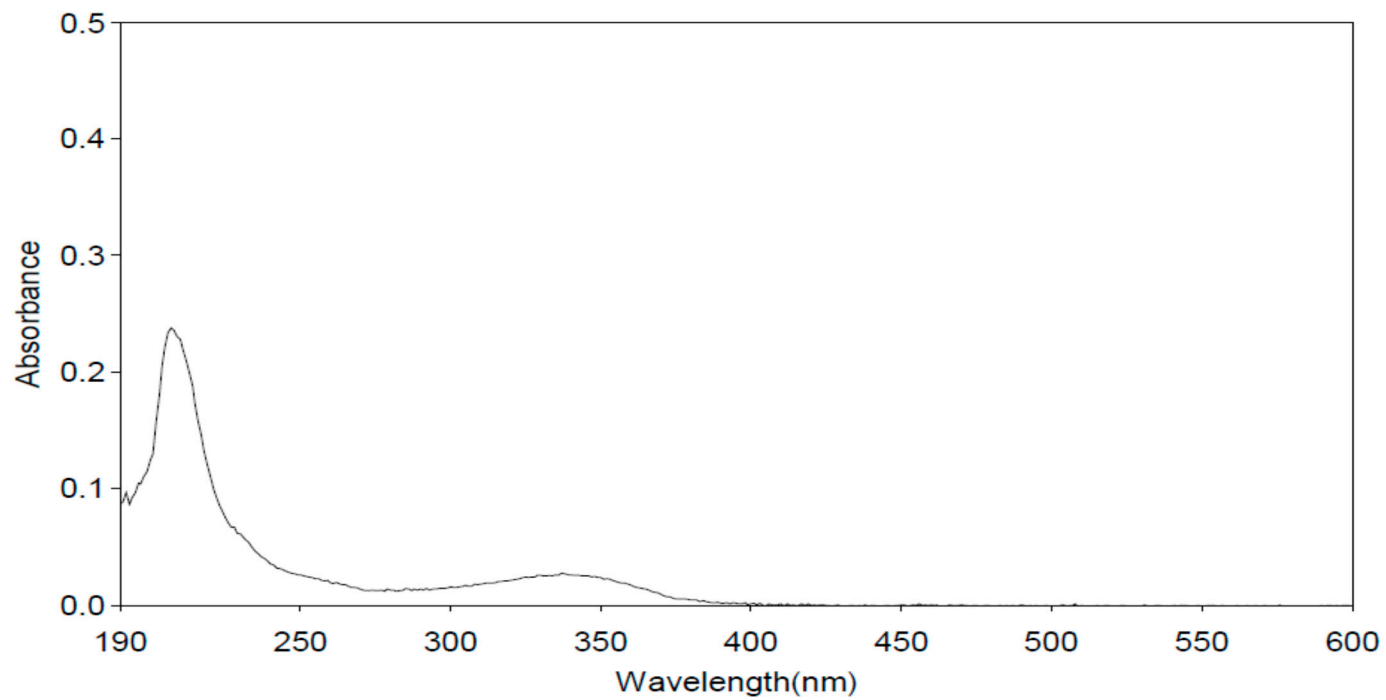

**Figure S18.** UV spectra of compound **1a**.

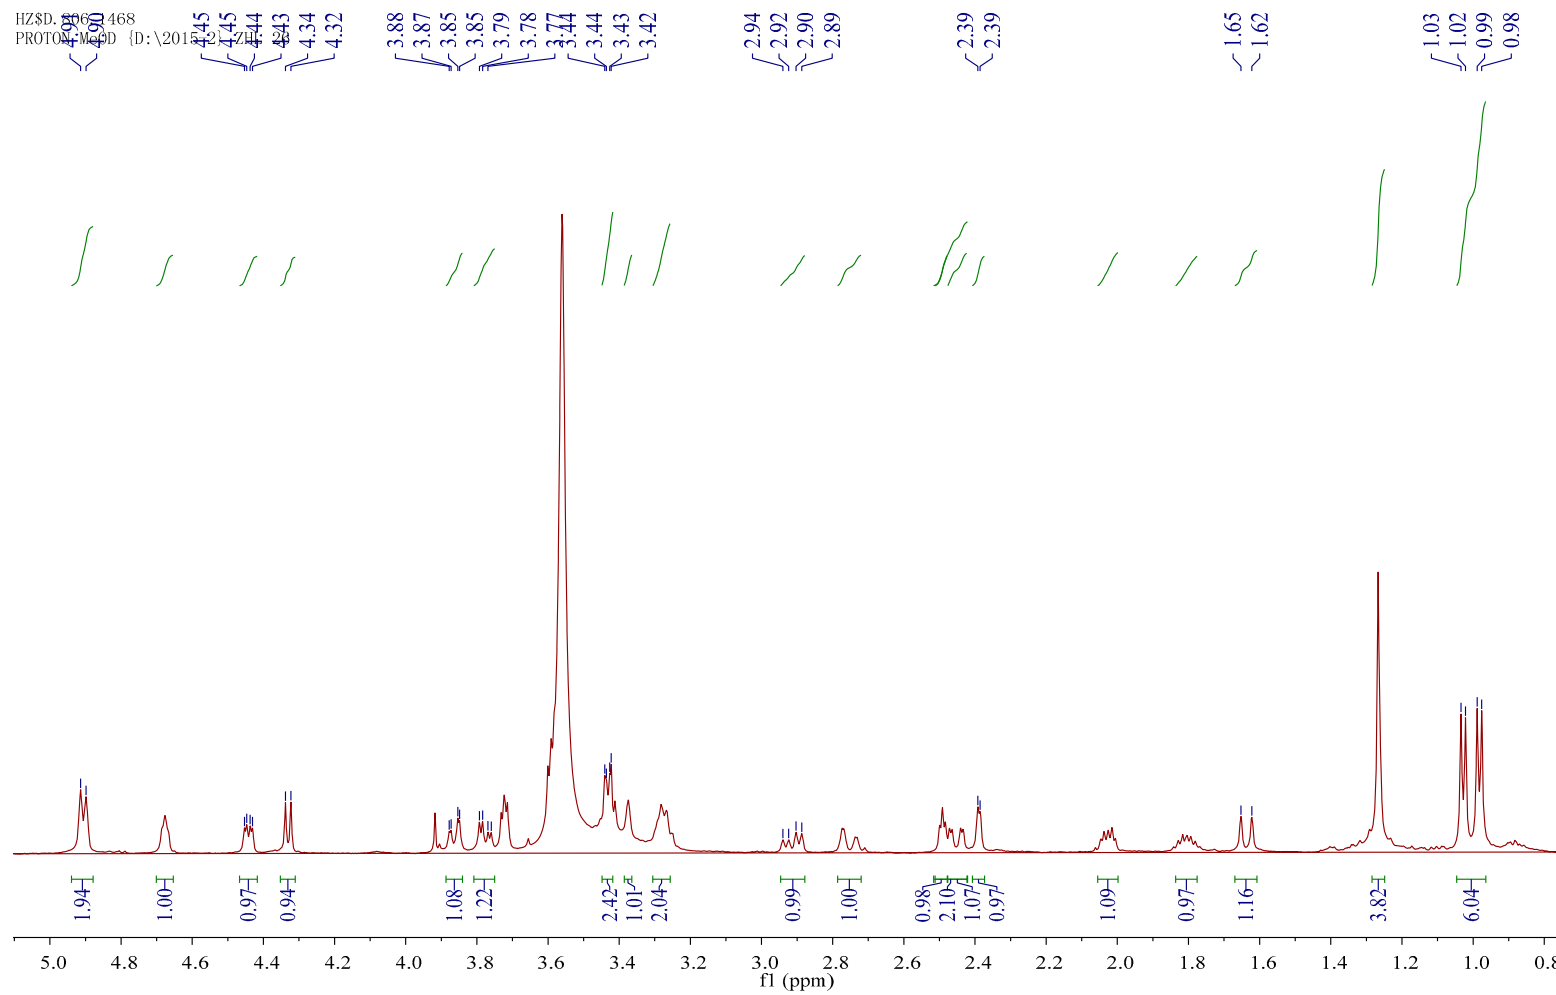

Figure S19.  $^1\text{H}$ -NMR spectra of compound 2 in  $\text{CD}_3\text{OD}$ .

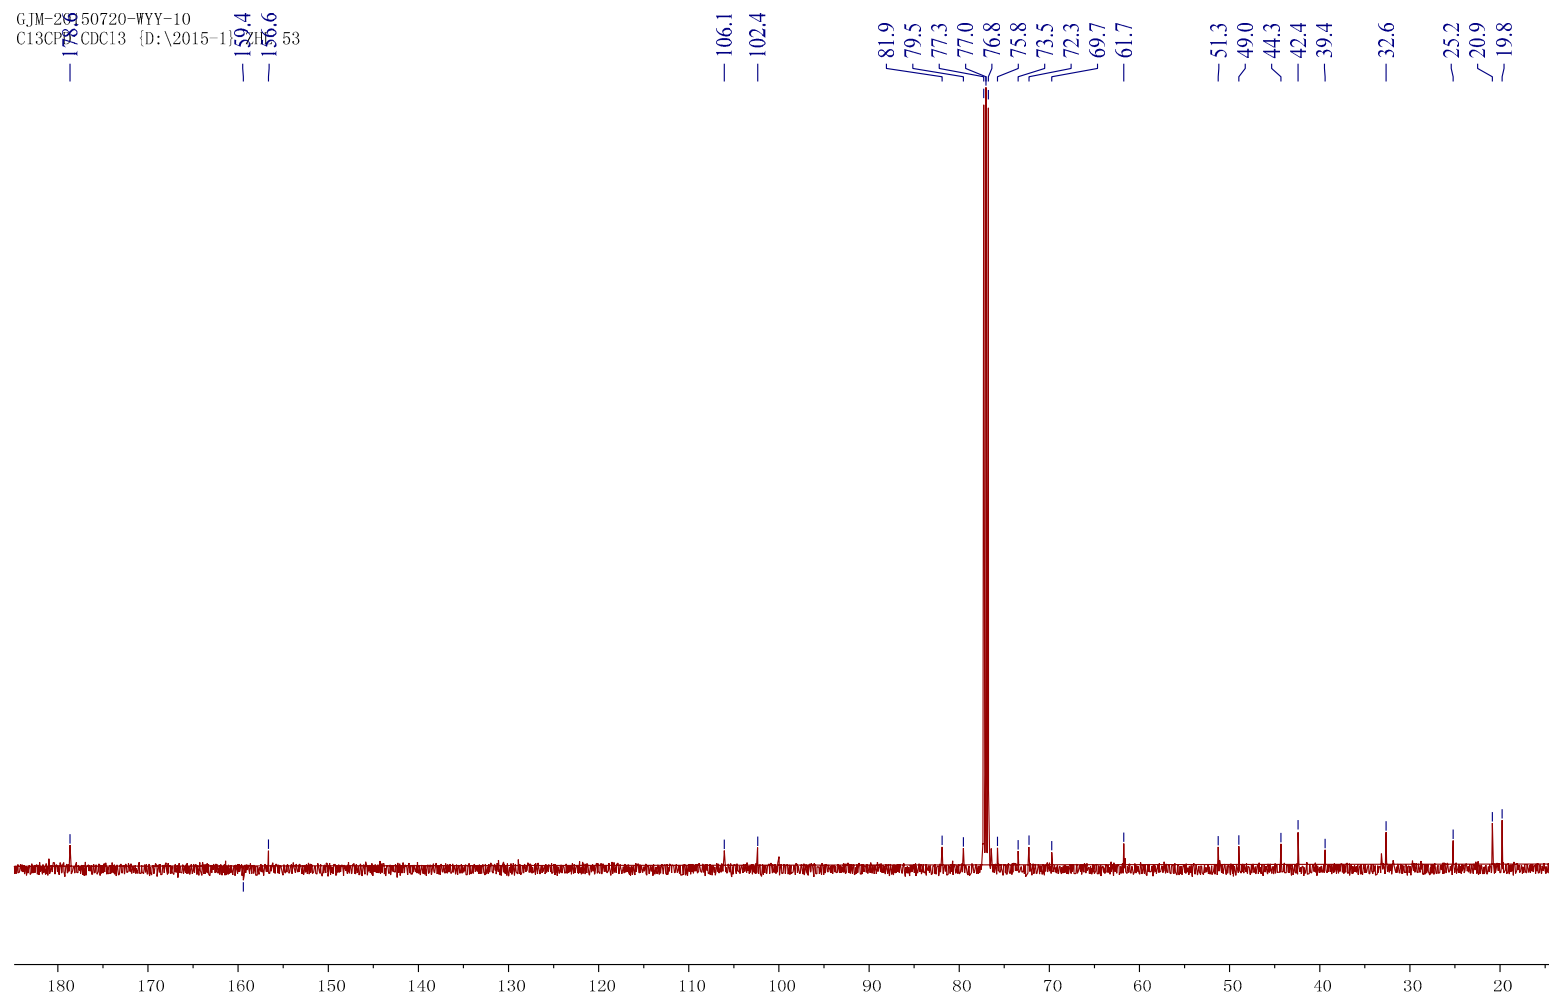

Figure S20.  $^{13}\text{C}$ -NMR spectra of compound 2 in  $\text{CD}_3\text{OD}$ .

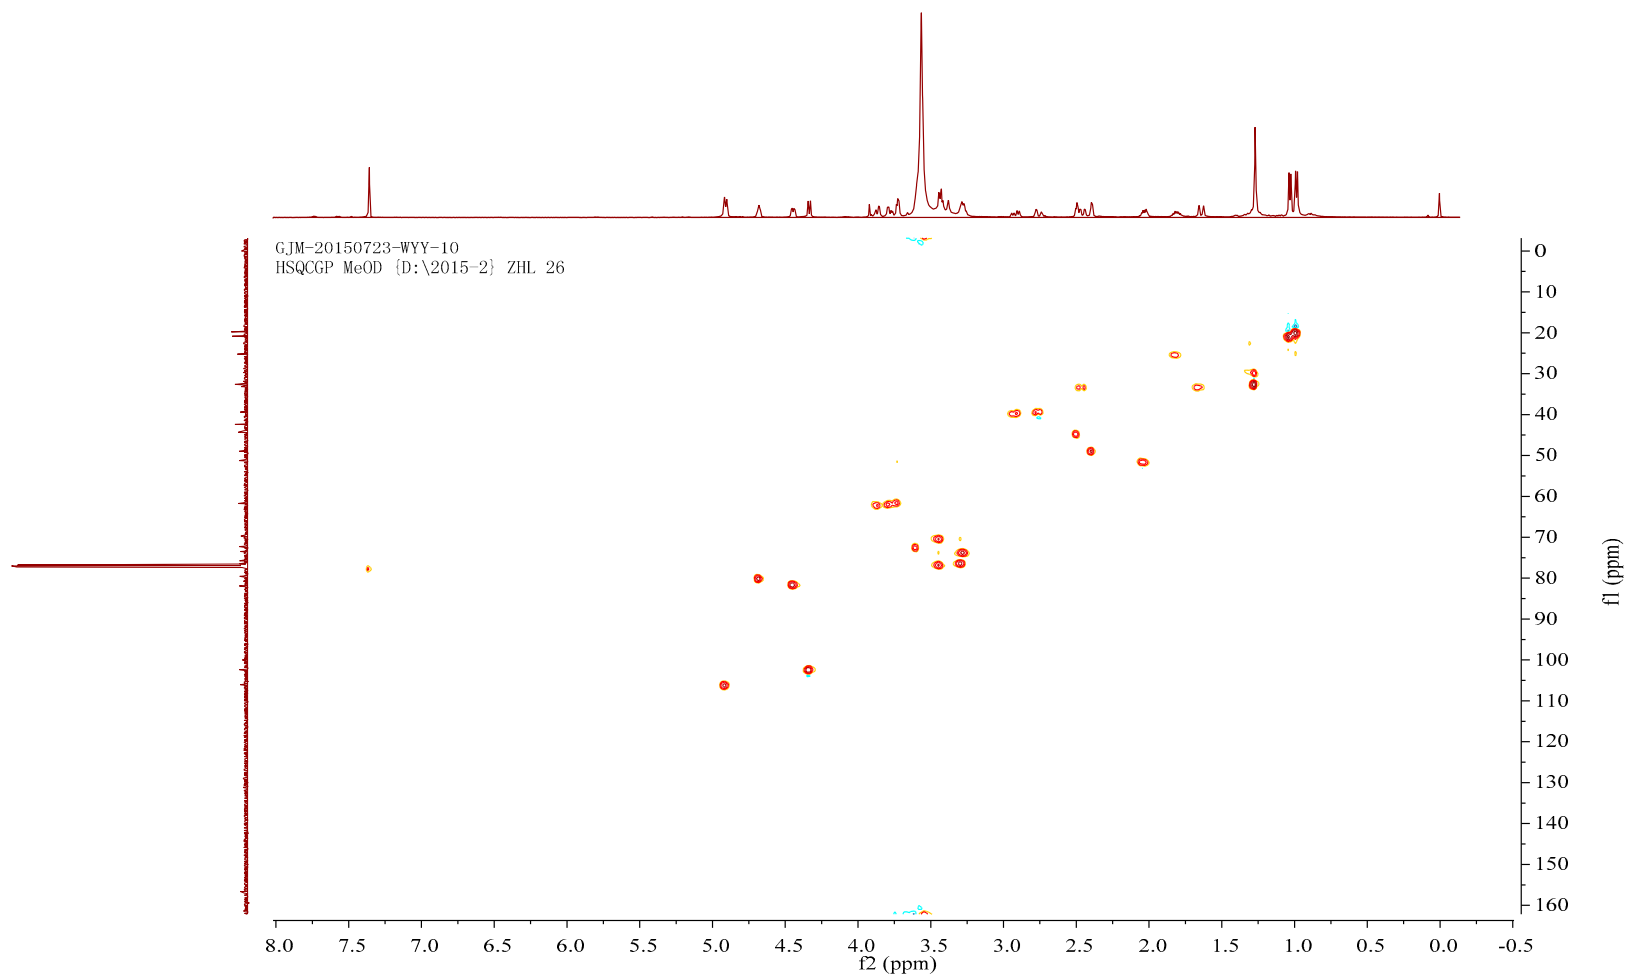

**Finger S21.** HSQC spectra of compound **2** in CD<sub>3</sub>OD.

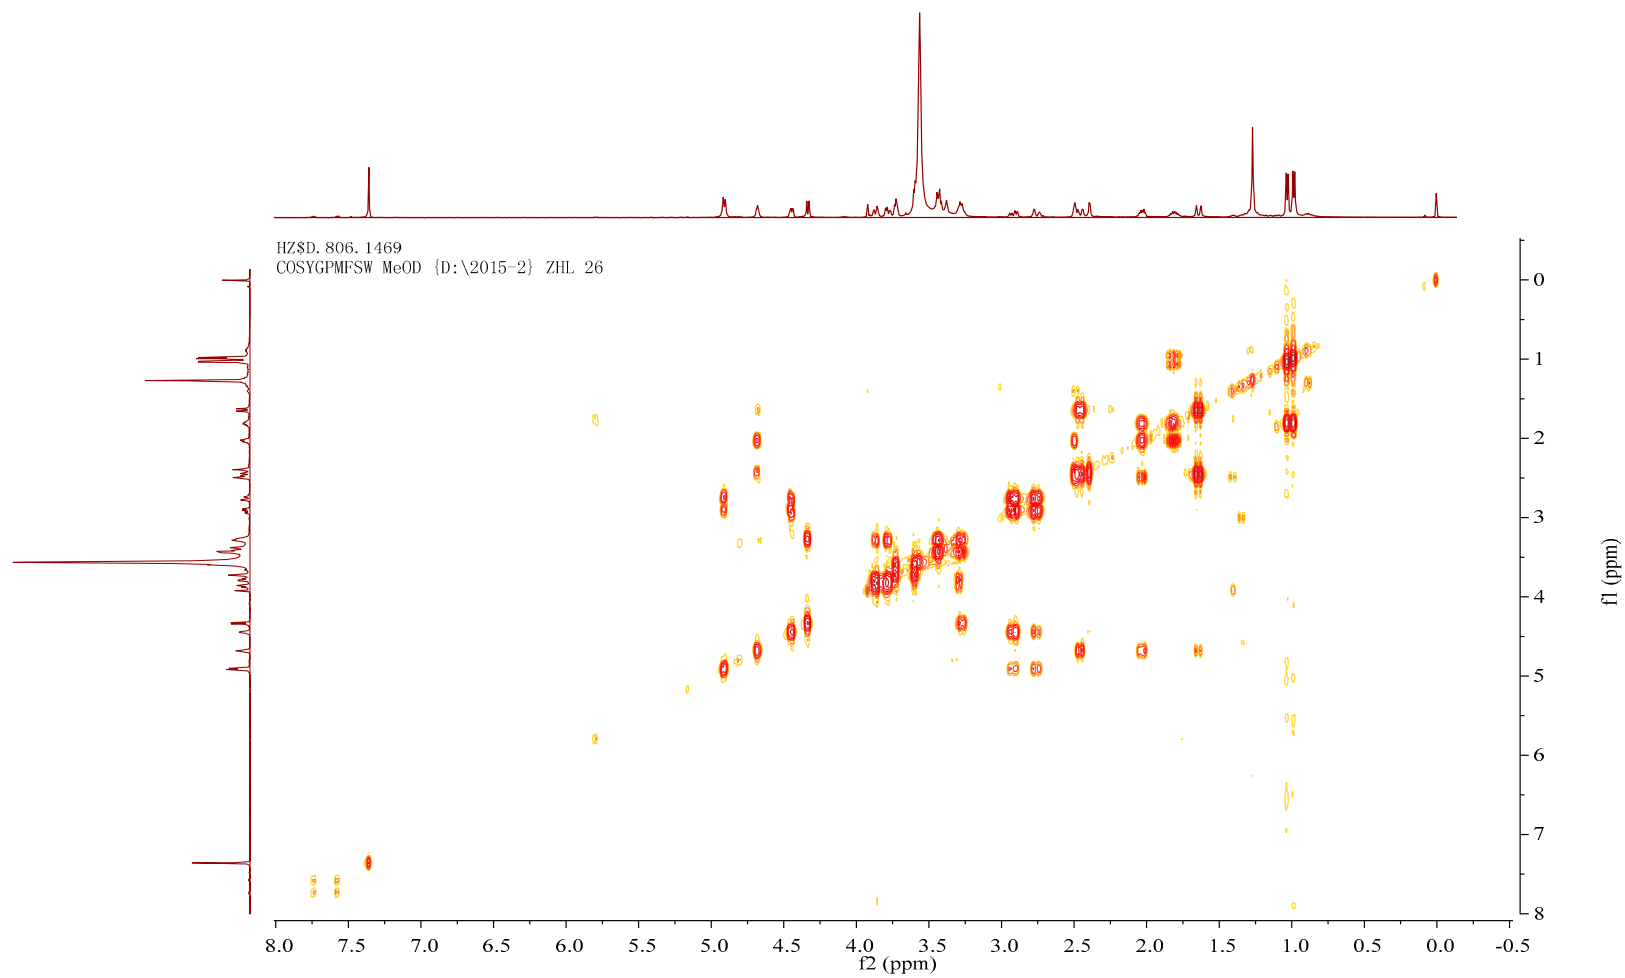

**Finger S22.**  $^1\text{H}$ - $^1\text{H}$  COSY spectra of compound **2** in  $\text{CD}_3\text{OD}$ .



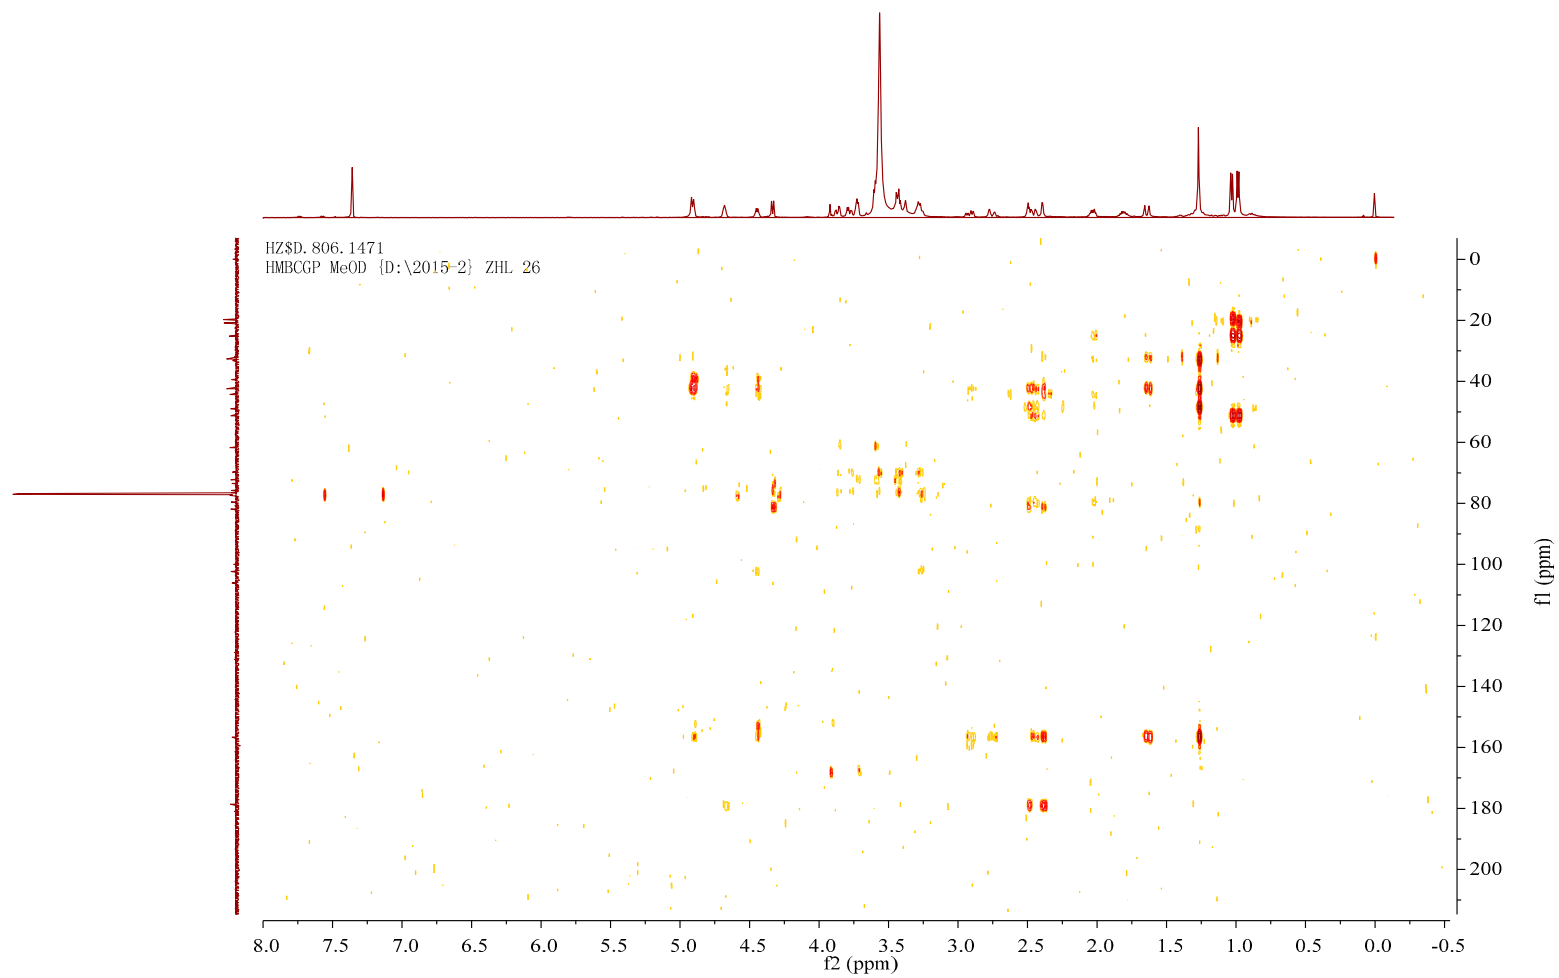

**Figure S23.** HMBC spectra of compound 2 in CD<sub>3</sub>OD.

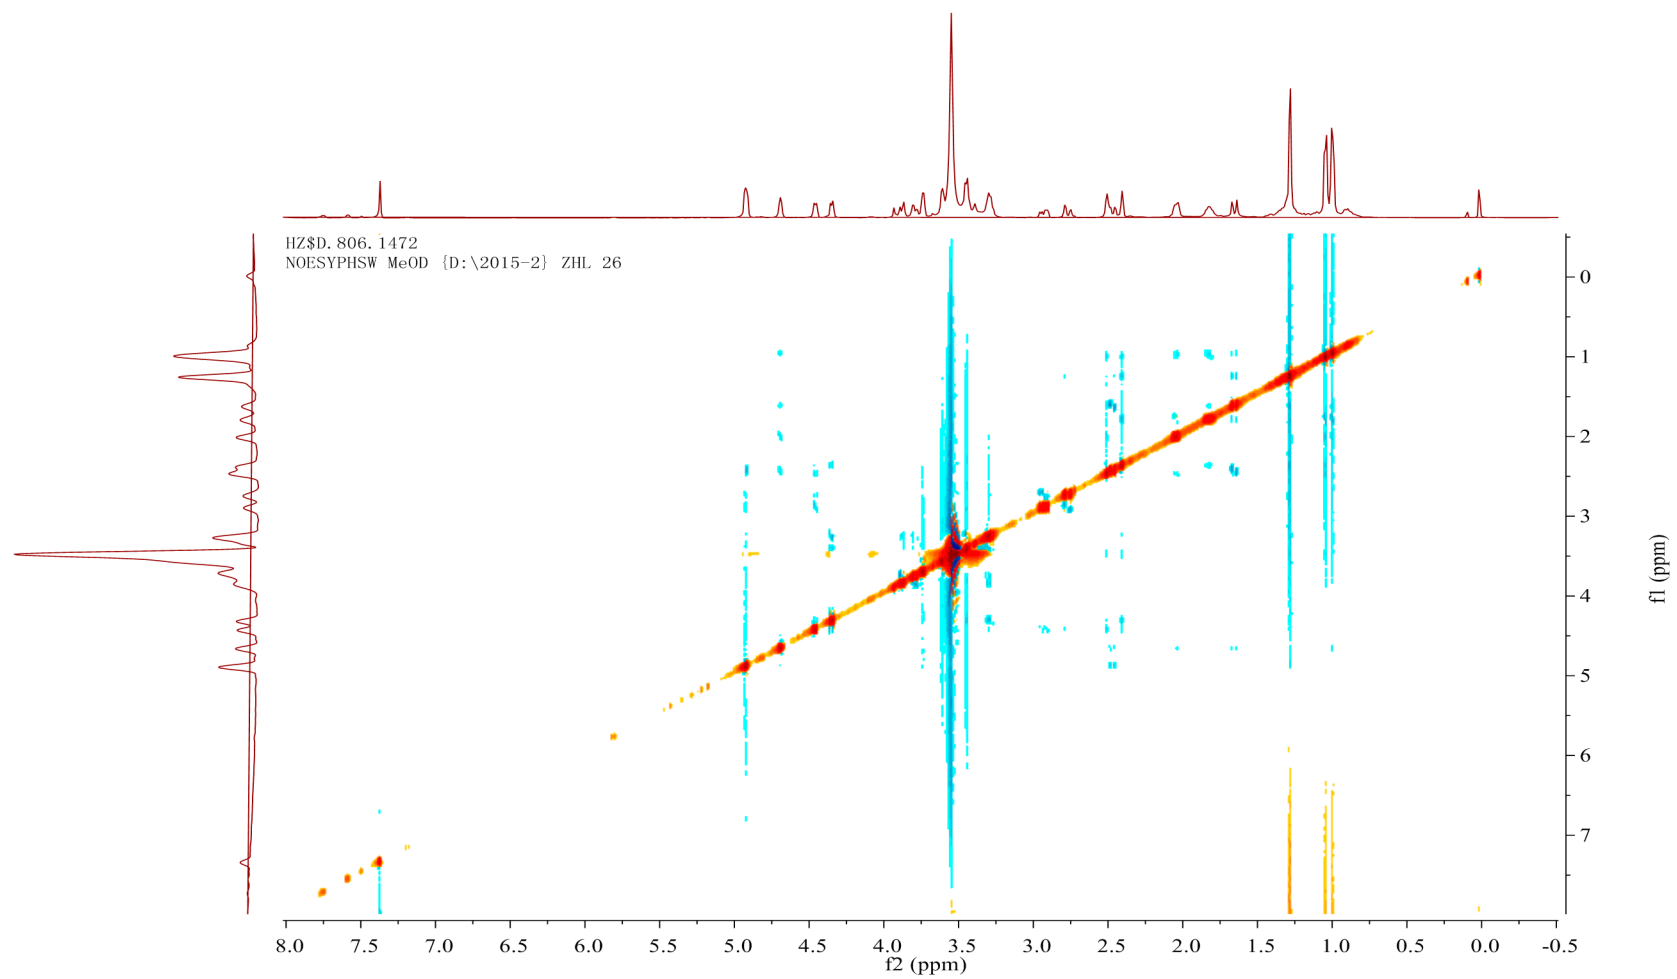

**Figure S24.** NOESY spectra of compound 2 in CD<sub>3</sub>OD.

## Elemental Composition Report

Page 1

## Single Mass Analysis

Tolerance = 5.0 PPM / DBE: min = -1.5, max = 50.0

Element prediction: Off

Number of isotope peaks used for i-FIT = 3

Monoisotopic Mass, Even Electron Ions

161 formula(e) evaluated with 1 results within limits (up to 50 closest results for each mass)

Elements Used:

C: 5-80 H: 2-120 O: 0-20 Na: 0-1

wyy-10

LCT PXE KE324

14-Oct-2015

14:02:31

1: TOF MS ES+

7.41e+003

wyy-10\_1014 40 (0.863) AM2 (Ar,10000.0,0.00,1.00); ABS; Cm (27:40)

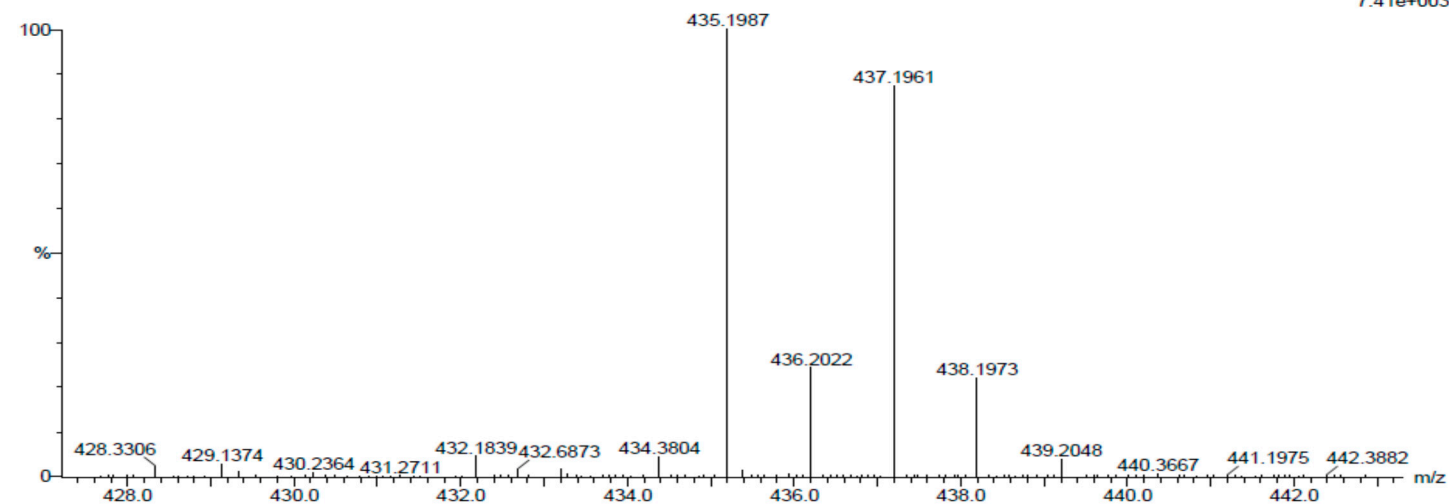

Minimum:

Maximum: 5.0 5.0 -1.5

5.0 50.0

| Mass     | Calc. Mass | mDa  | PPM  | DBE | i-FIT | i-FIT (Norm) | Formula       |
|----------|------------|------|------|-----|-------|--------------|---------------|
| 435.1987 | 435.1995   | -0.8 | -1.8 | 5.5 | 141.0 | 0.0          | C21 H32 O8 Na |

Figure S25. HRESIMS spectrum of compound 2.

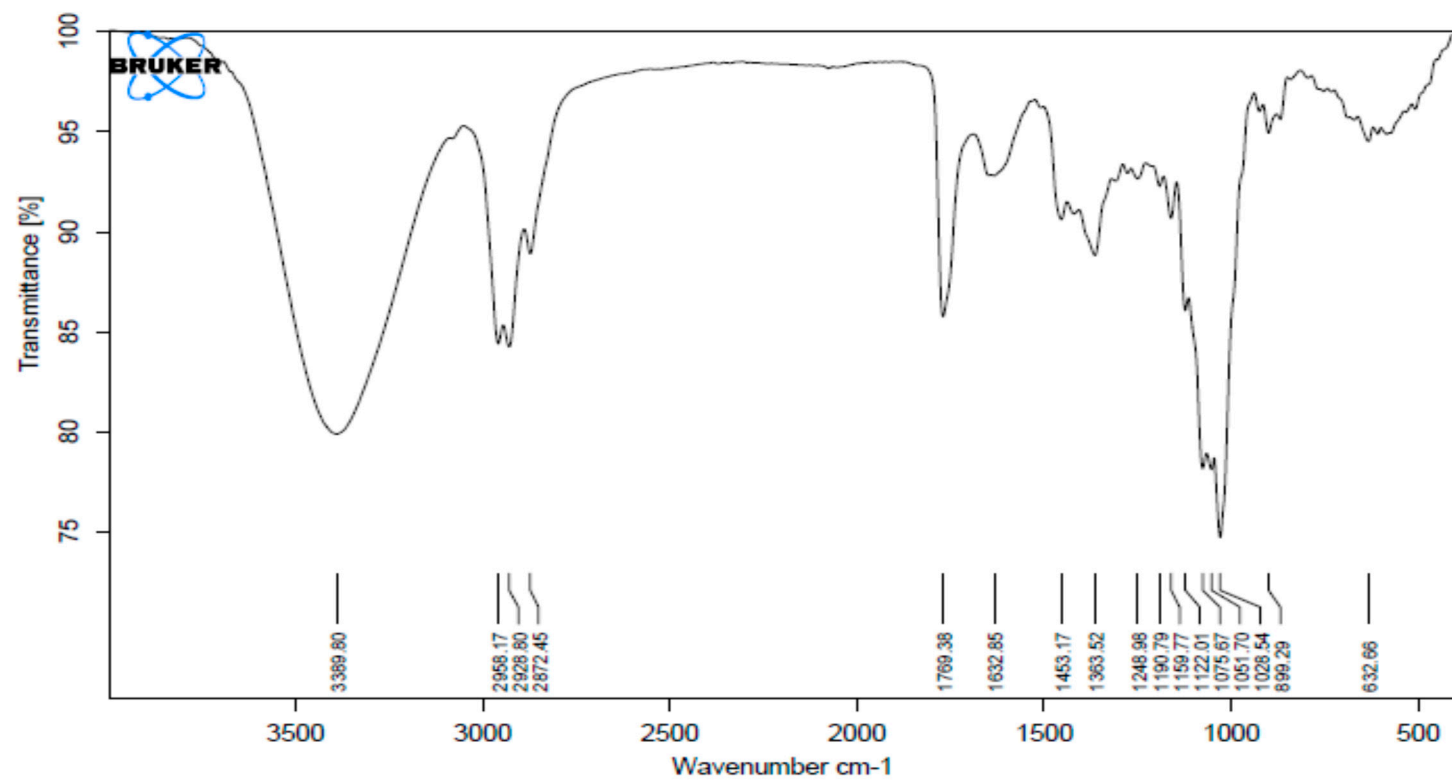

|                                    |        |                                    |            |
|------------------------------------|--------|------------------------------------|------------|
| E:\DATABASE\MEAS\20151121\WYY-10.0 | WYY-10 | Instrument type and / or accessory | 26/11/2015 |
|------------------------------------|--------|------------------------------------|------------|

Figure S26. IR spectra of compound 2.

**THERMO ELECTRON ~ VISIONpro SOFTWARE V4.10**

Operator Name (None Entered)  
Department (None Entered)  
Organization (None Entered)  
Information (None Entered)

Date of Report 2015-9-16  
Time of Report 23:11:36下午

**Scan Graph**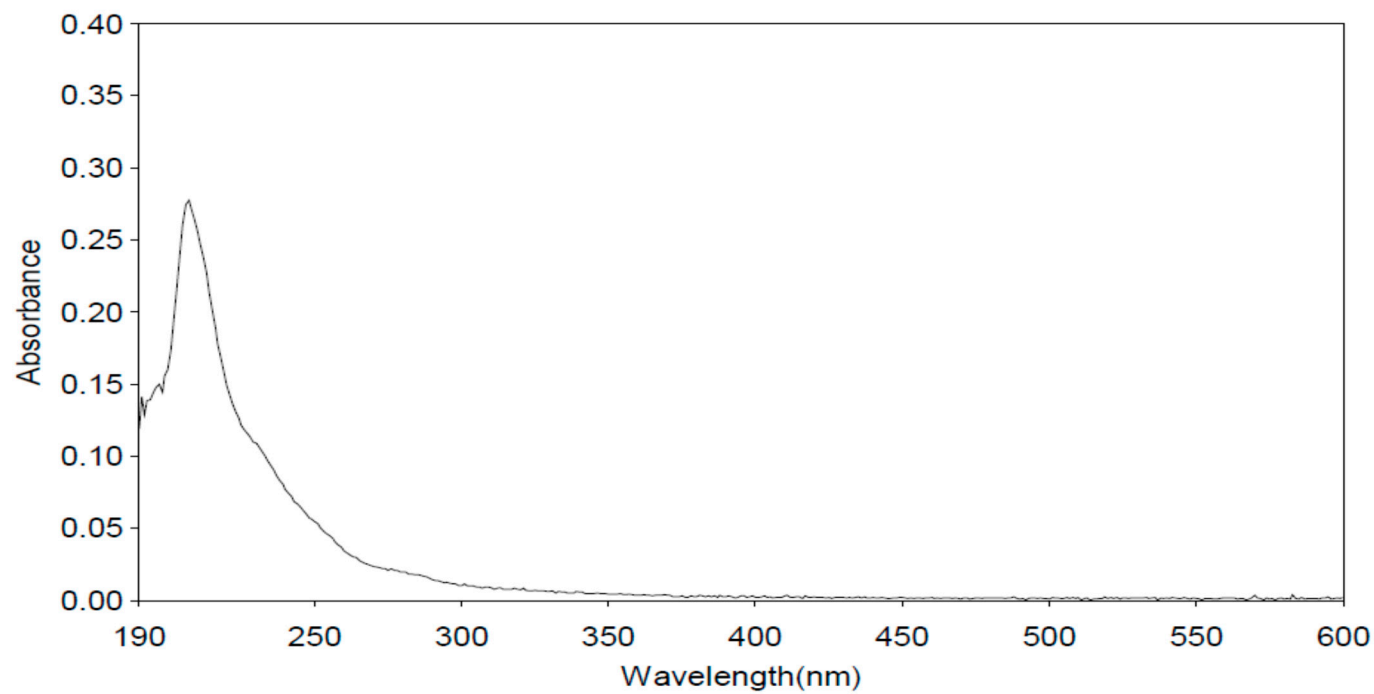

**Figure S27.** UV spectra of compound 2.

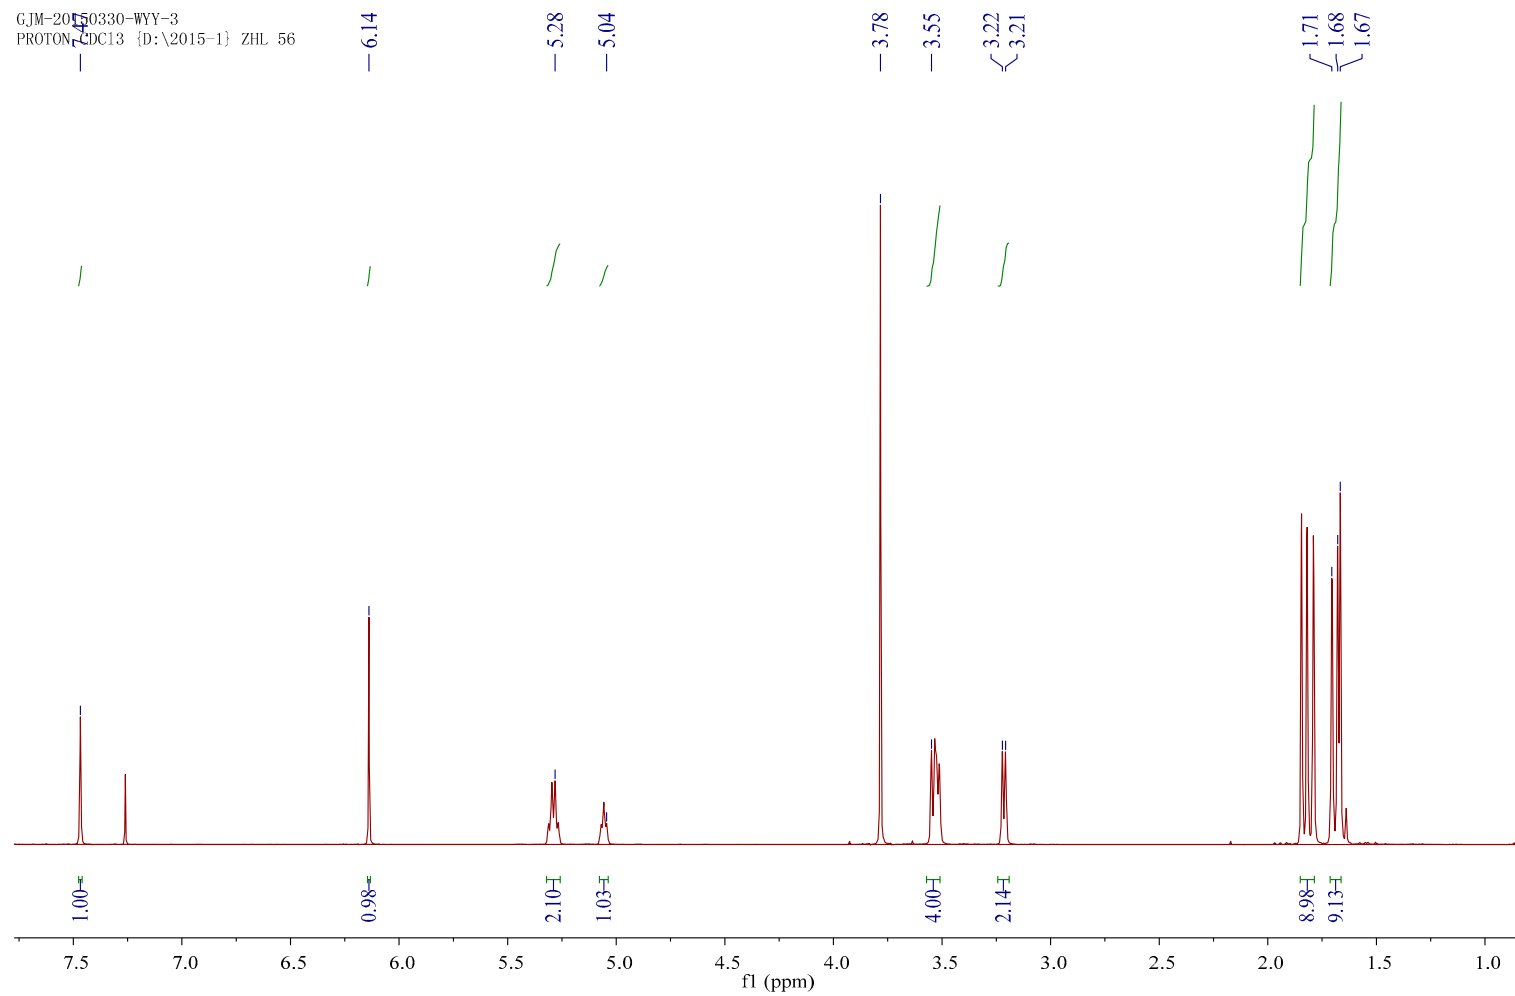

Figure S28.  $^1\text{H-NMR}$  spectra of compound **3** in  $\text{CDCl}_3$ .

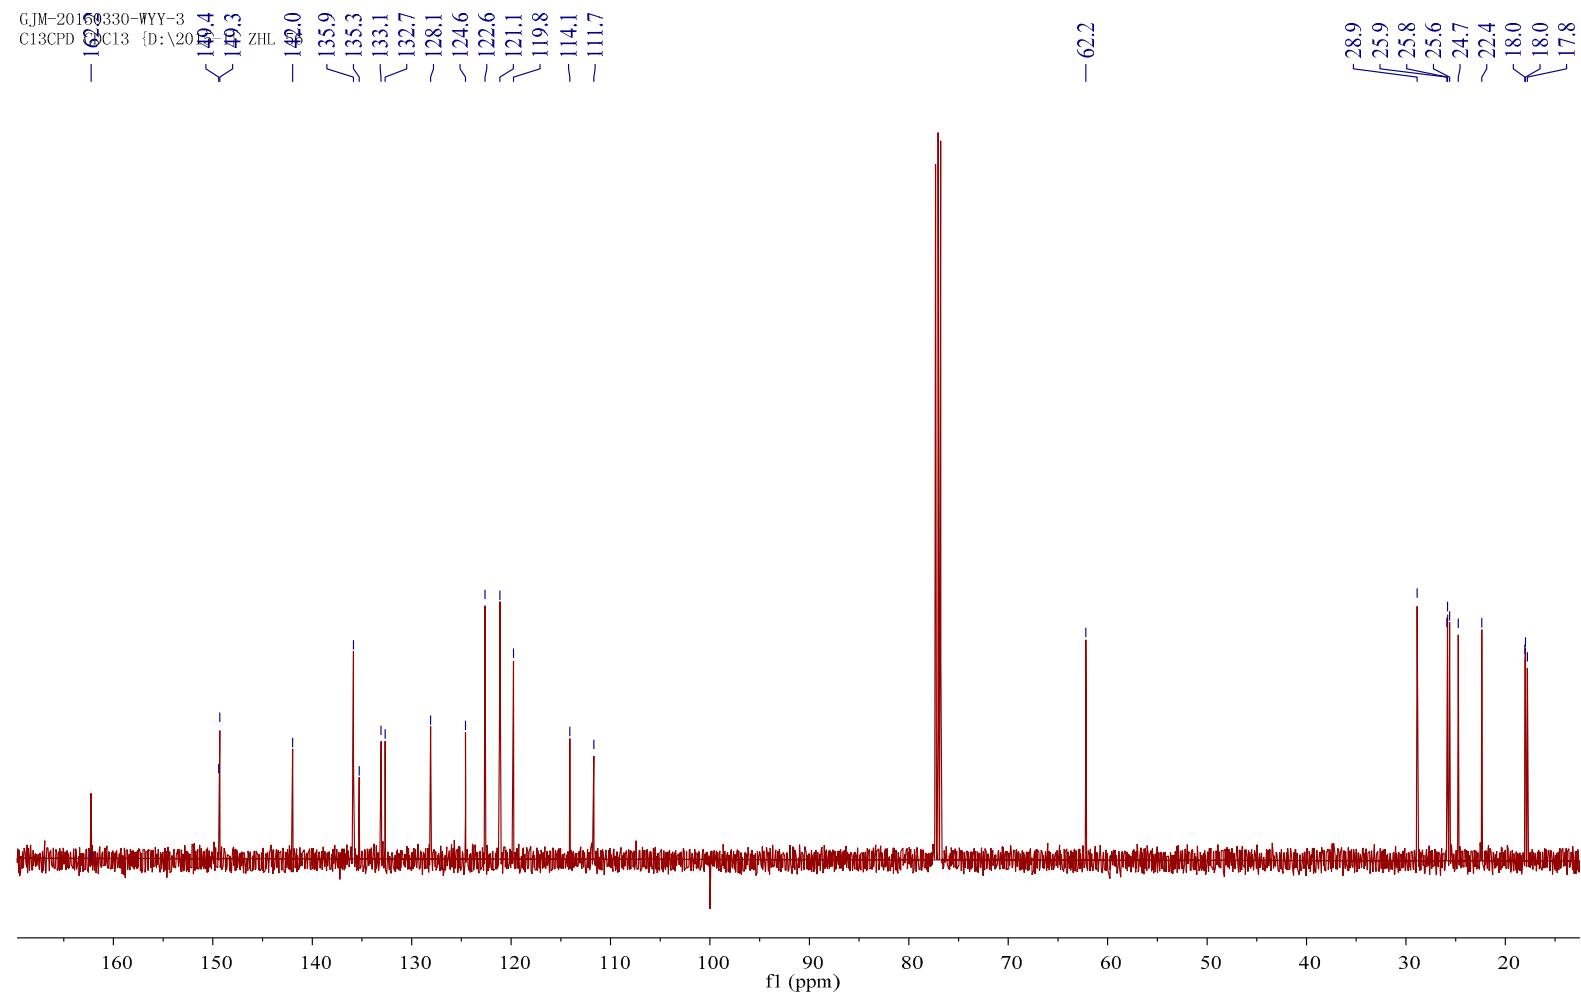

Figure S29.  $^{13}\text{C}$ -NMR spectra of compound 3 in  $\text{CDCl}_3$ .

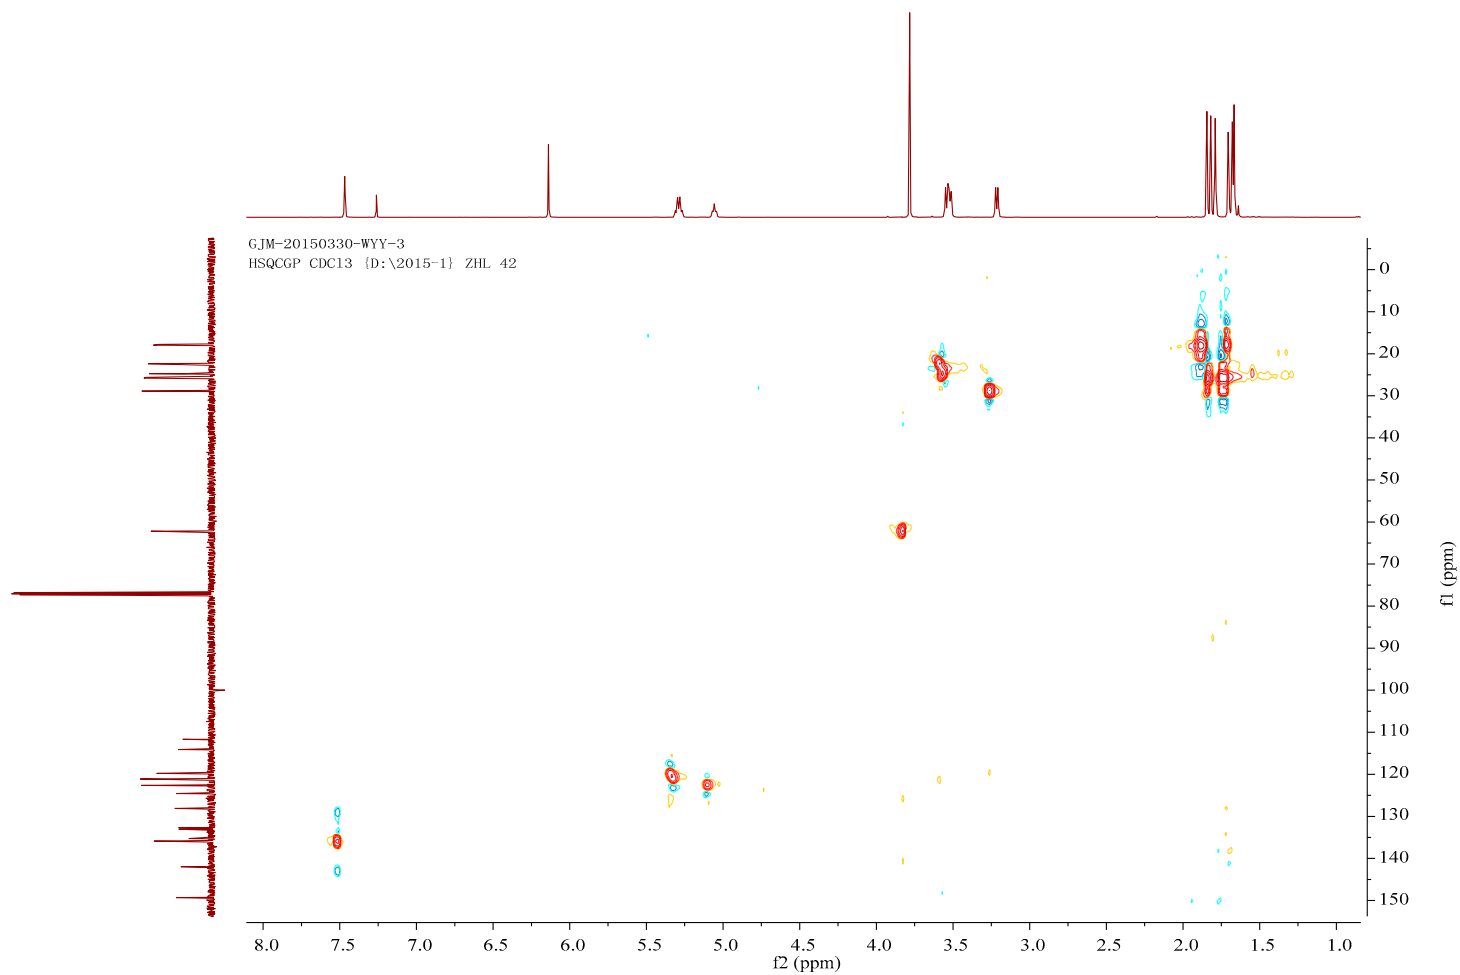

**Finger S30.** HSQC spectra of compound **3** in  $\text{CDCl}_3$ .



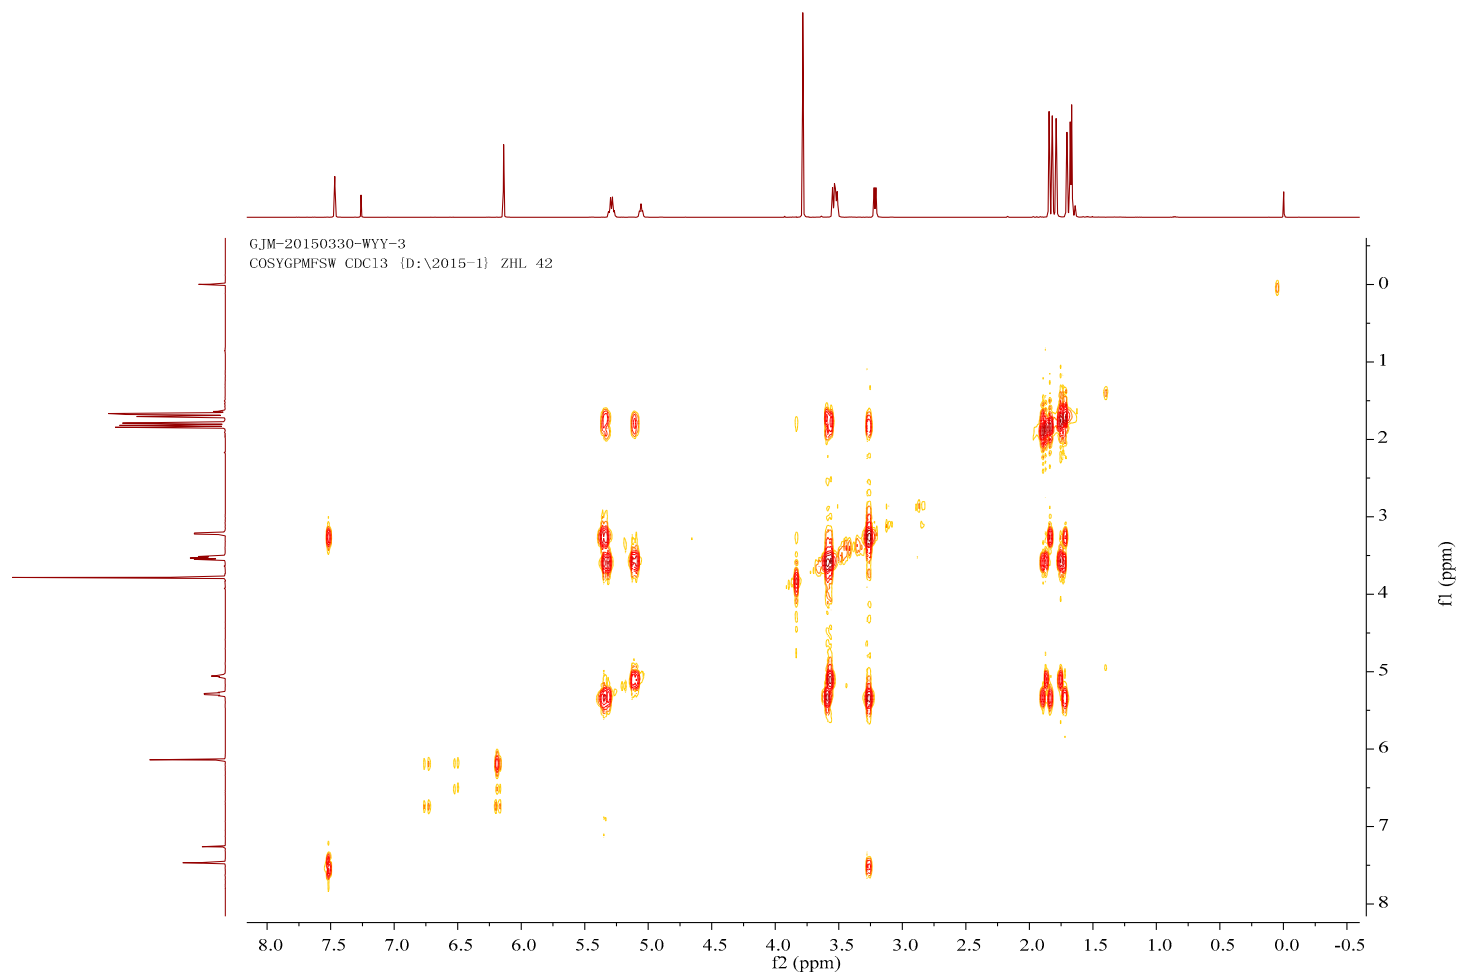

**Finger S31.**  $^1\text{H}$ - $^1\text{H}$  COSY spectra of compound **3** in  $\text{CDCl}_3$ .

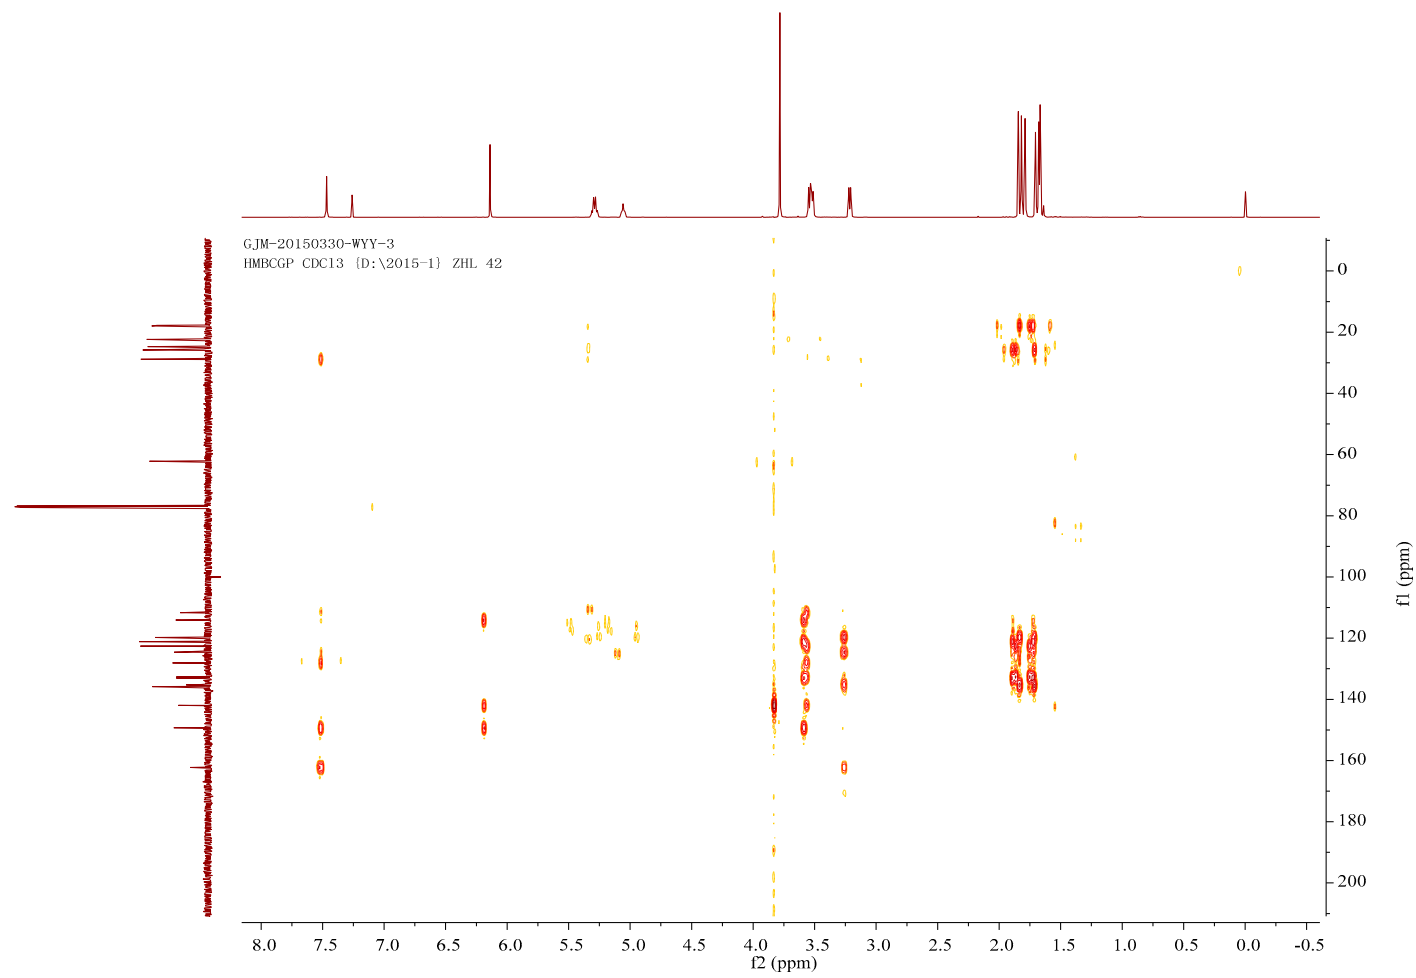

**Finger S32.** HMBC spectra of compound **3** in CDCl<sub>3</sub>.

## Elemental Composition Report

Page 1

## Single Mass Analysis

Tolerance = 5.0 PPM / DBE: min = -1.5, max = 50.0

Element prediction: Off

Number of isotope peaks used for i-FIT = 3

Monoisotopic Mass, Even Electron Ions

140 formula(e) evaluated with 1 results within limits (up to 50 closest results for each mass)

Elements Used:

C: 5-80 H: 2-120 O: 0-20 Na: 0-1

wyy-3n

LCT PXE KE324

14-Oct-2015

13:55:10

1: TOF MS ES-

7.84e+003

wyy-3n\_10104 23 (0.495) AM2 (Ar,10000.0,0.00,1.00); ABS; Cm (10:23)

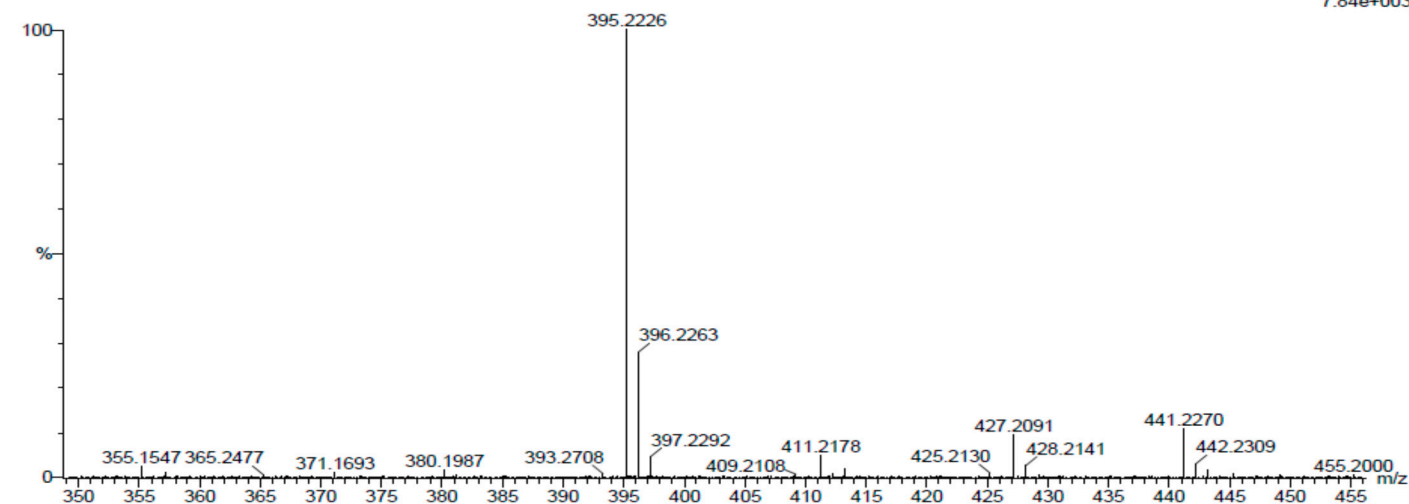

Minimum:

Maximum: 5.0 5.0 -1.5

| Mass     | Calc. Mass | mDa | PPM | DBE  | i-FIT | i-FIT (Norm) | Formula    |
|----------|------------|-----|-----|------|-------|--------------|------------|
| 395.2226 | 395.2222   | 0.4 | 1.0 | 10.5 | 79.5  | 0.0          | C25 H31 O4 |

Figure S33. HRESTM of compound 3 in CD<sub>3</sub>OD.

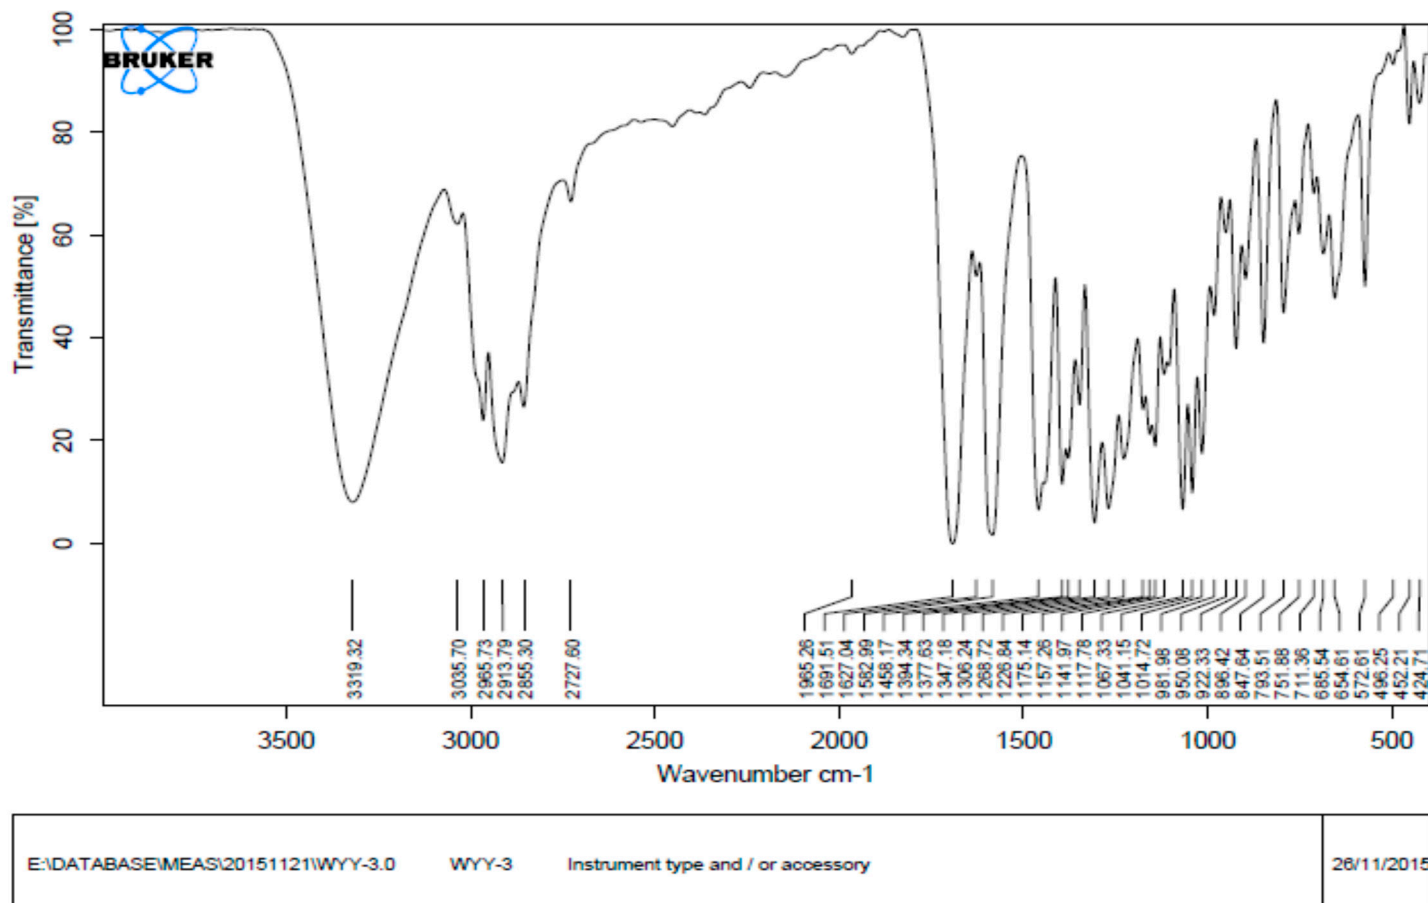

Figure S34. IR spectra of compound 3.

**THERMO ELECTRON ~ VISIONpro SOFTWARE V4.10**

Operator Name (None Entered)  
Department (None Entered)  
Organization (None Entered)  
Information (None Entered)

Date of Report 2015-9-23  
Time of Report 12:36:01下午

**Scan Graph**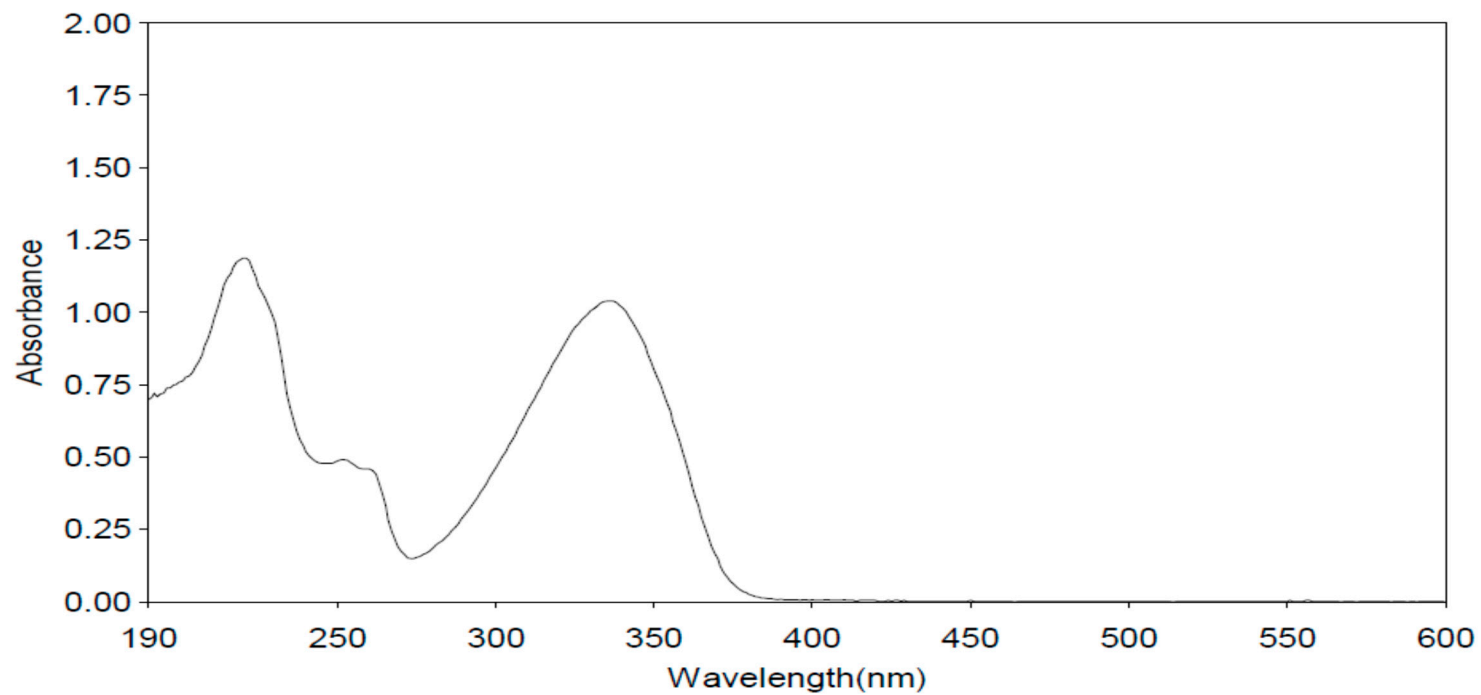

**Figure S35.** UV spectra of compound 3.

PROTON CDC13 {D:\2016-1} ZHL 16

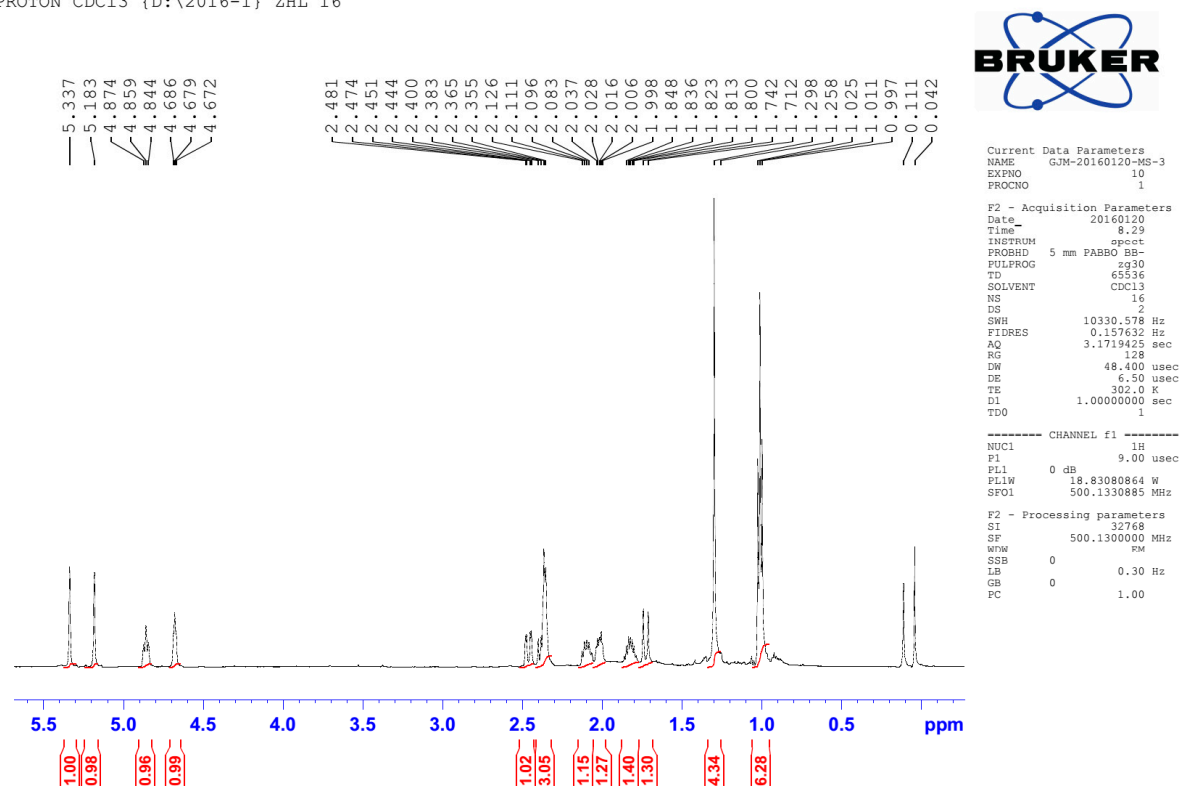Figure S36. <sup>1</sup>H-NMR spectra of compound **1b** in CDCl<sub>3</sub>.

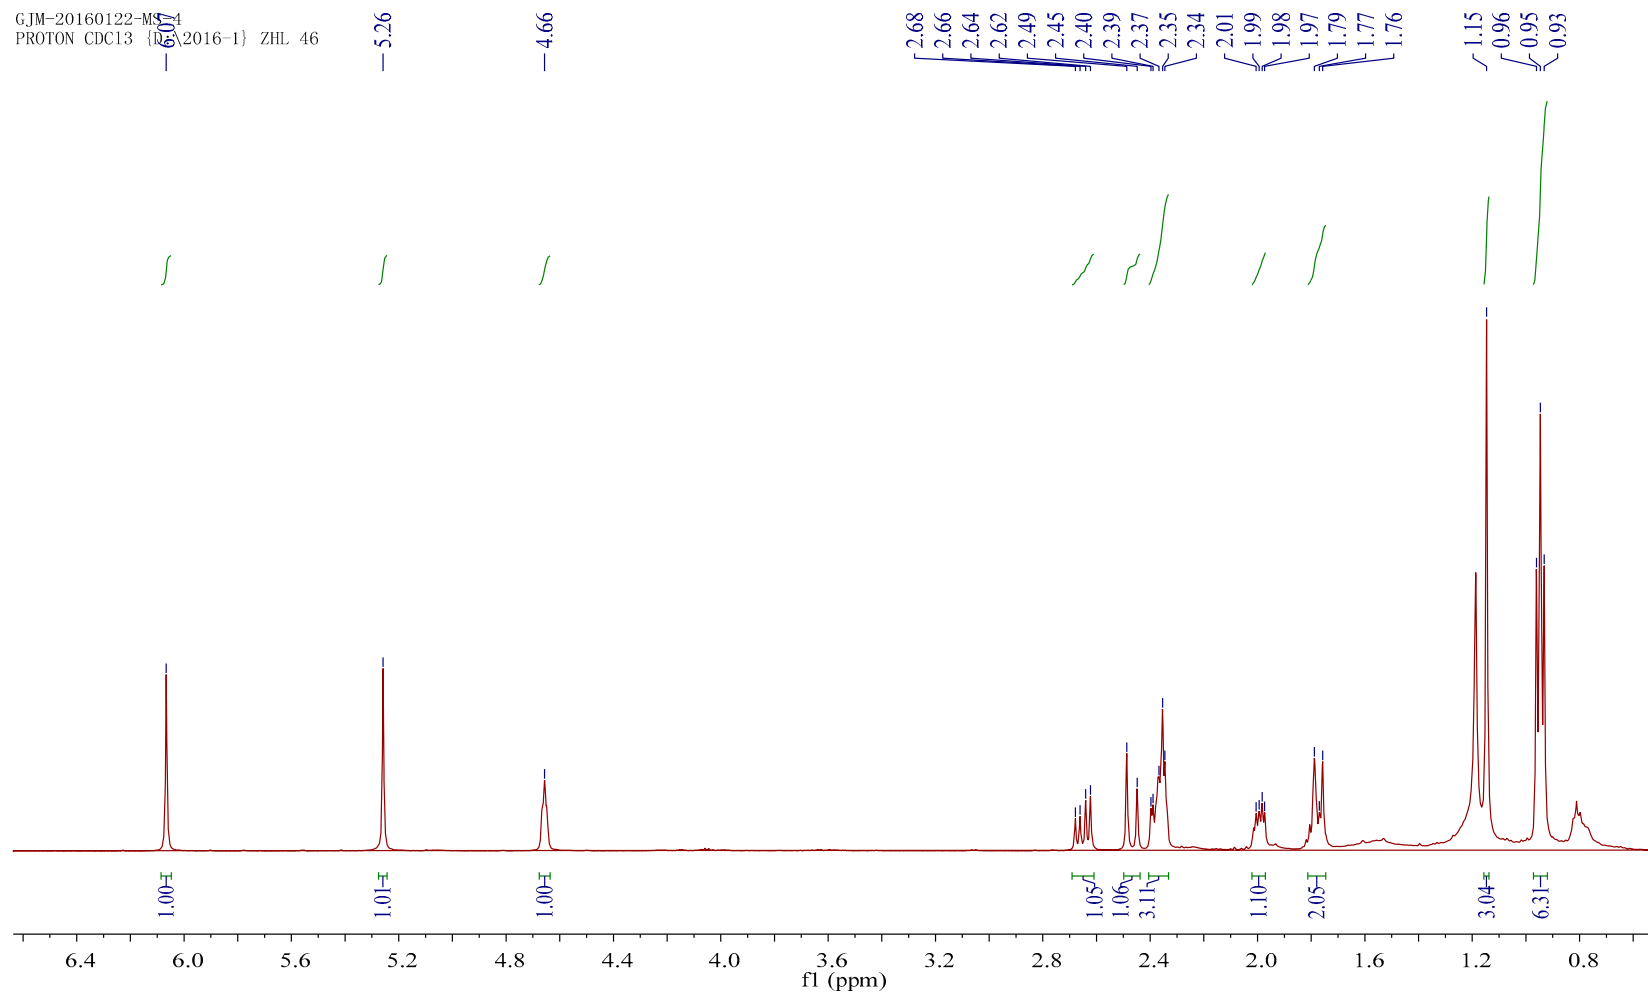

Figure S37.  $^1\text{H}$ -NMR spectra of compound **1c** in  $\text{CDCl}_3$ .

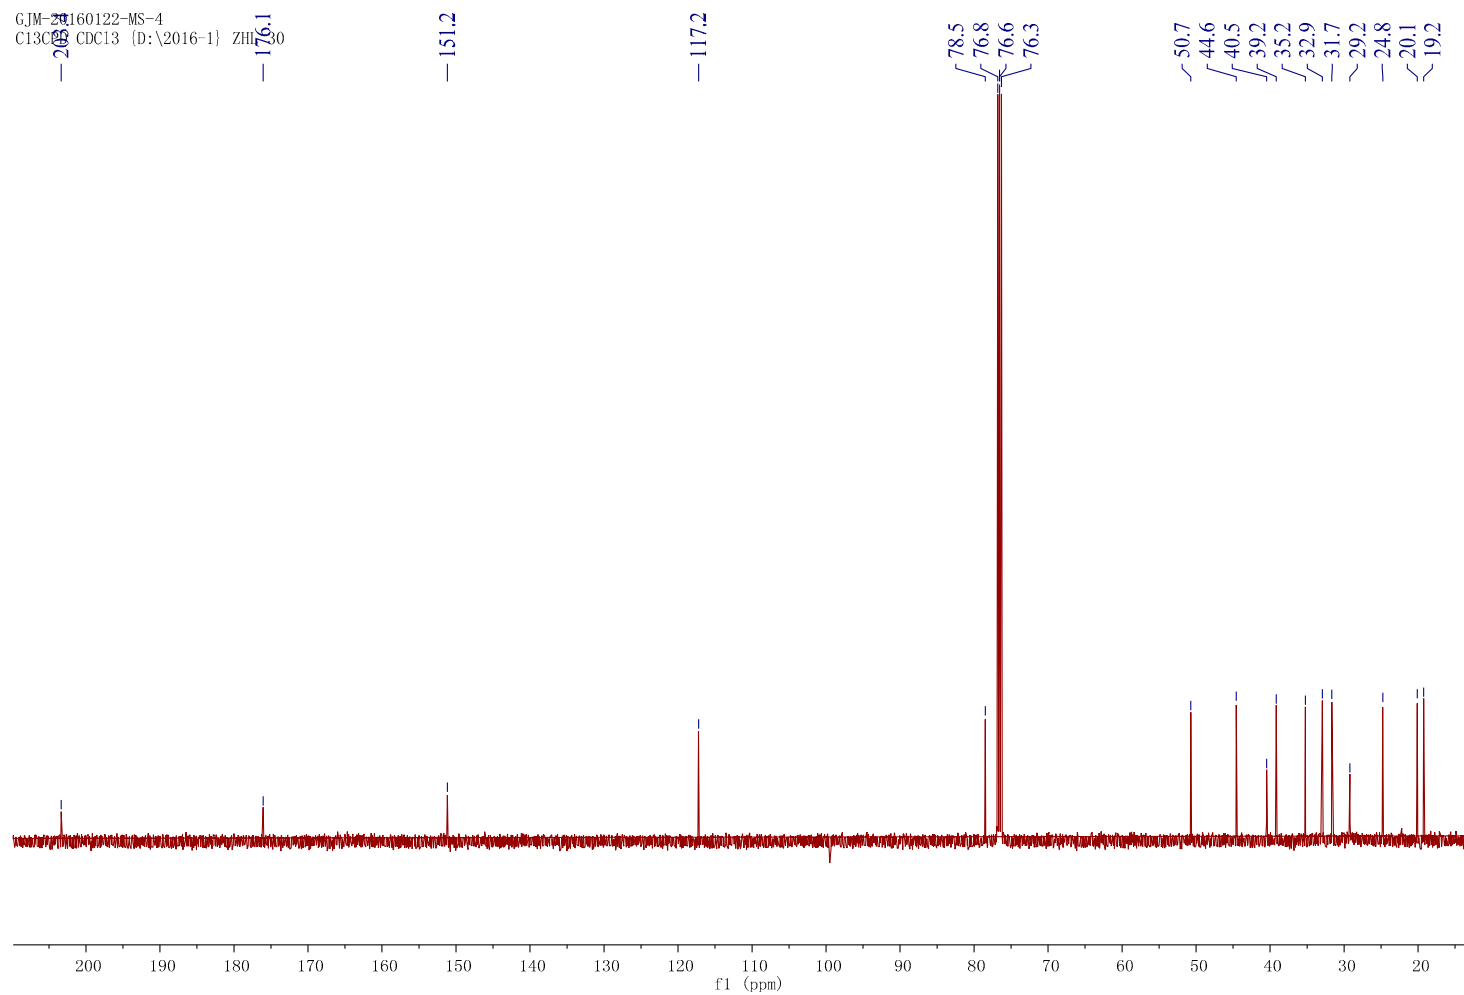

Figure S38.  $^{13}\text{C}$ -NMR spectra of compound **1c** in  $\text{CDCl}_3$ .



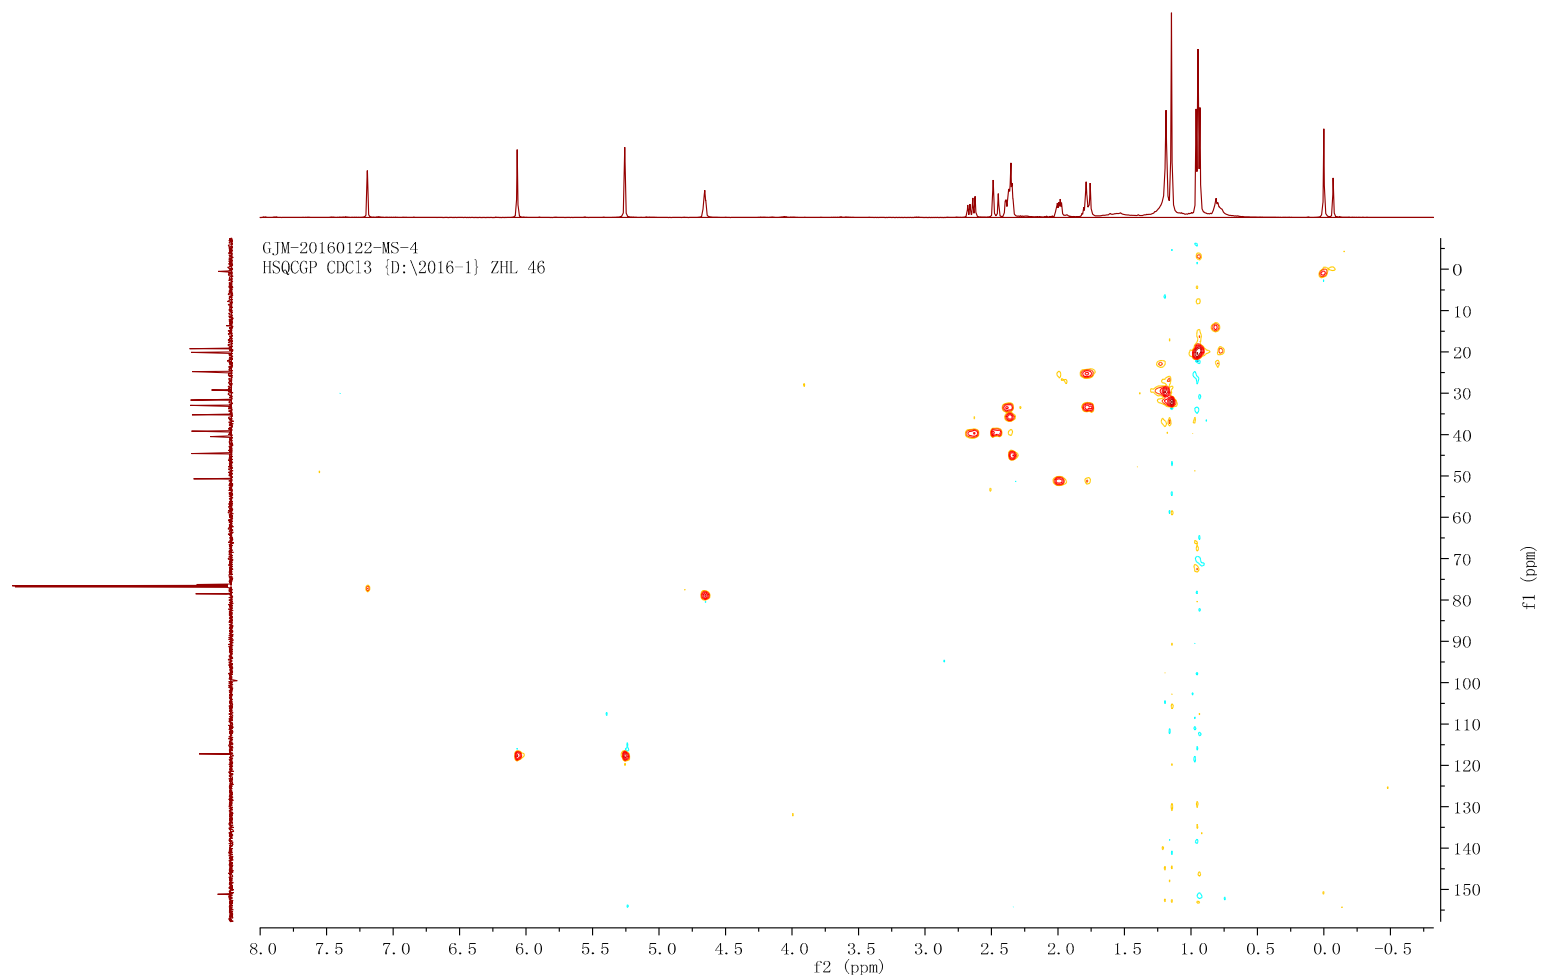

**Finger S39.** HSQC spectra of compound **1c** in CDCl<sub>3</sub>.

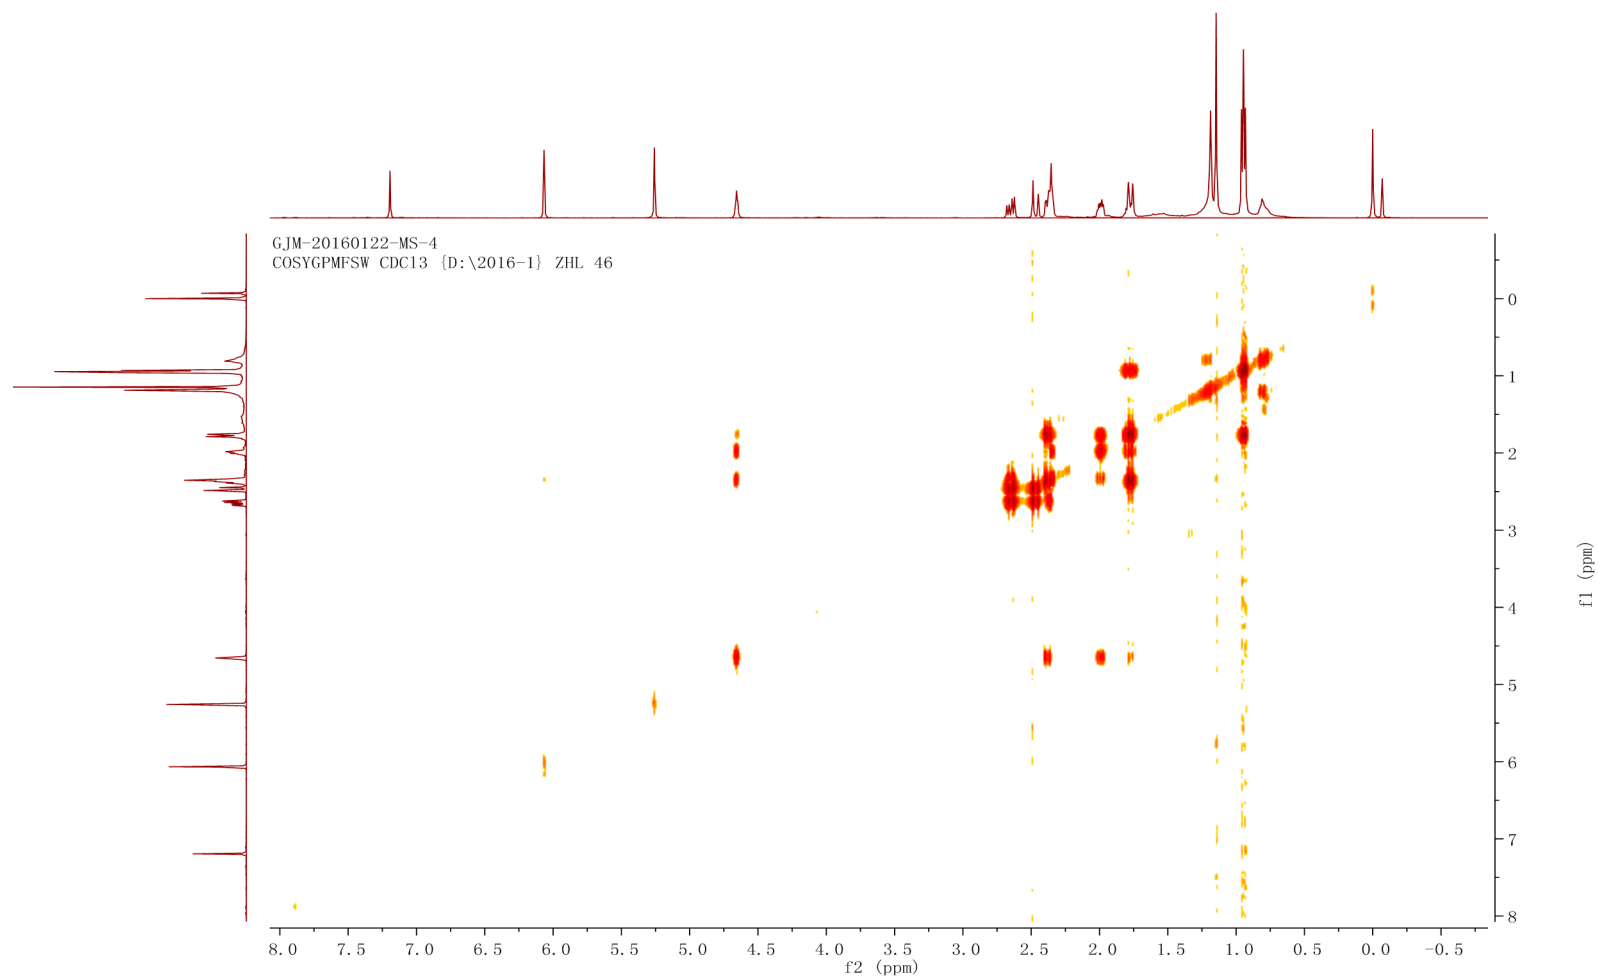

**Finger S40.**  $^1\text{H}$ - $^1\text{H}$  COSY spectra of compound **1c** in  $\text{CDCl}_3$ .

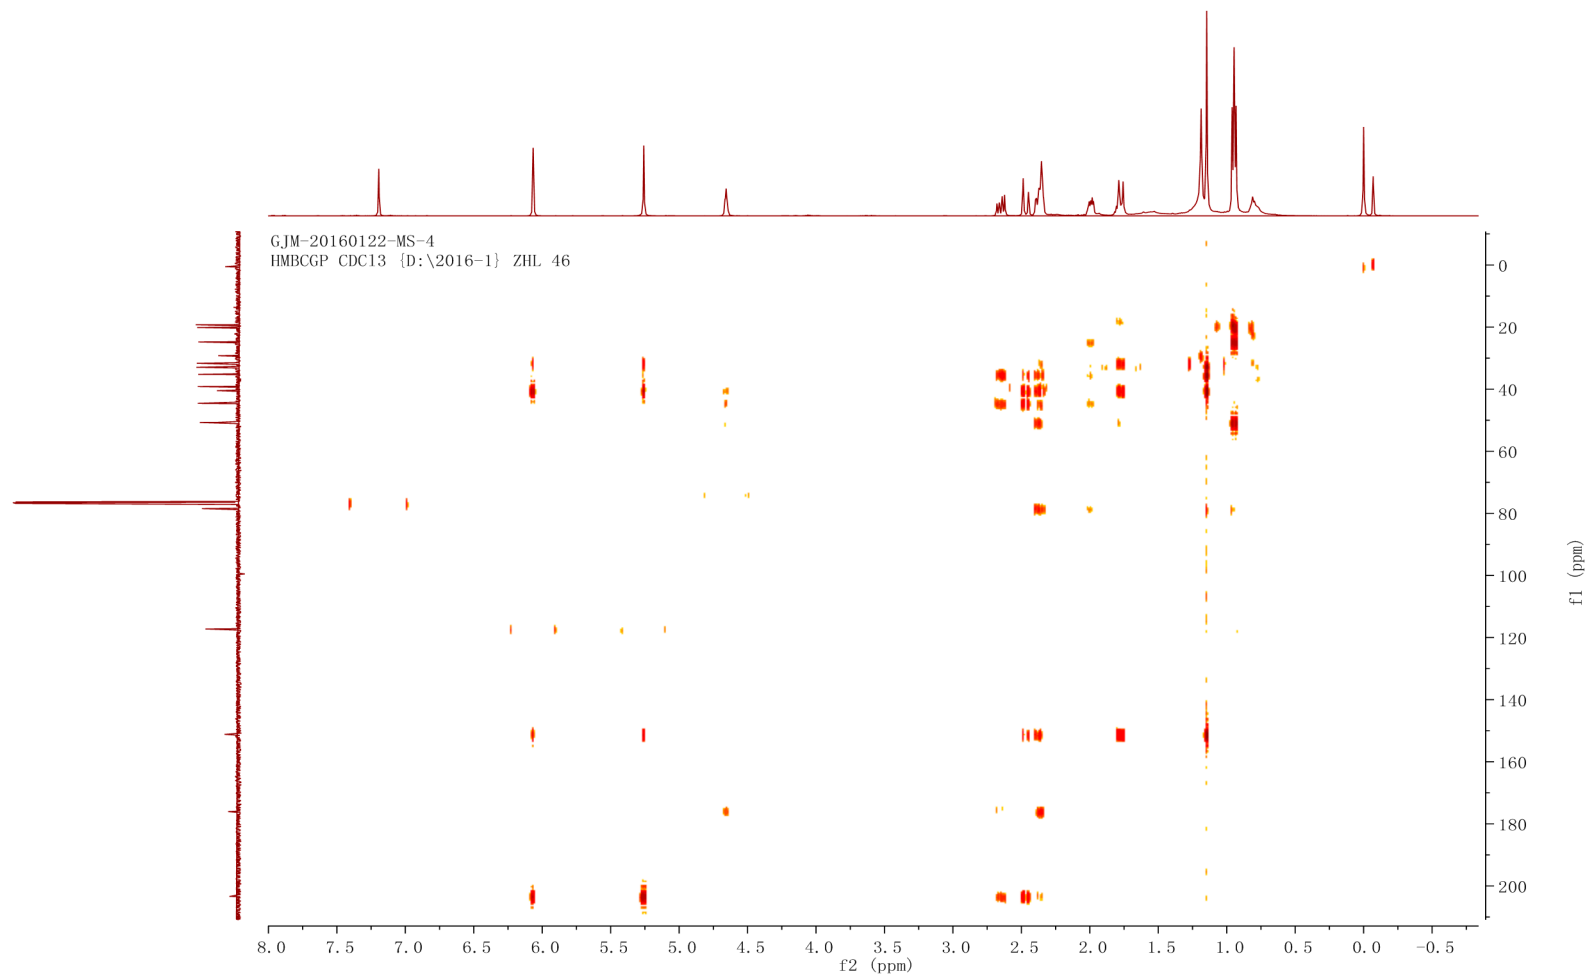

**Figure S41.** HMBC spectra of compound **1c** in  $\text{CDCl}_3$ .

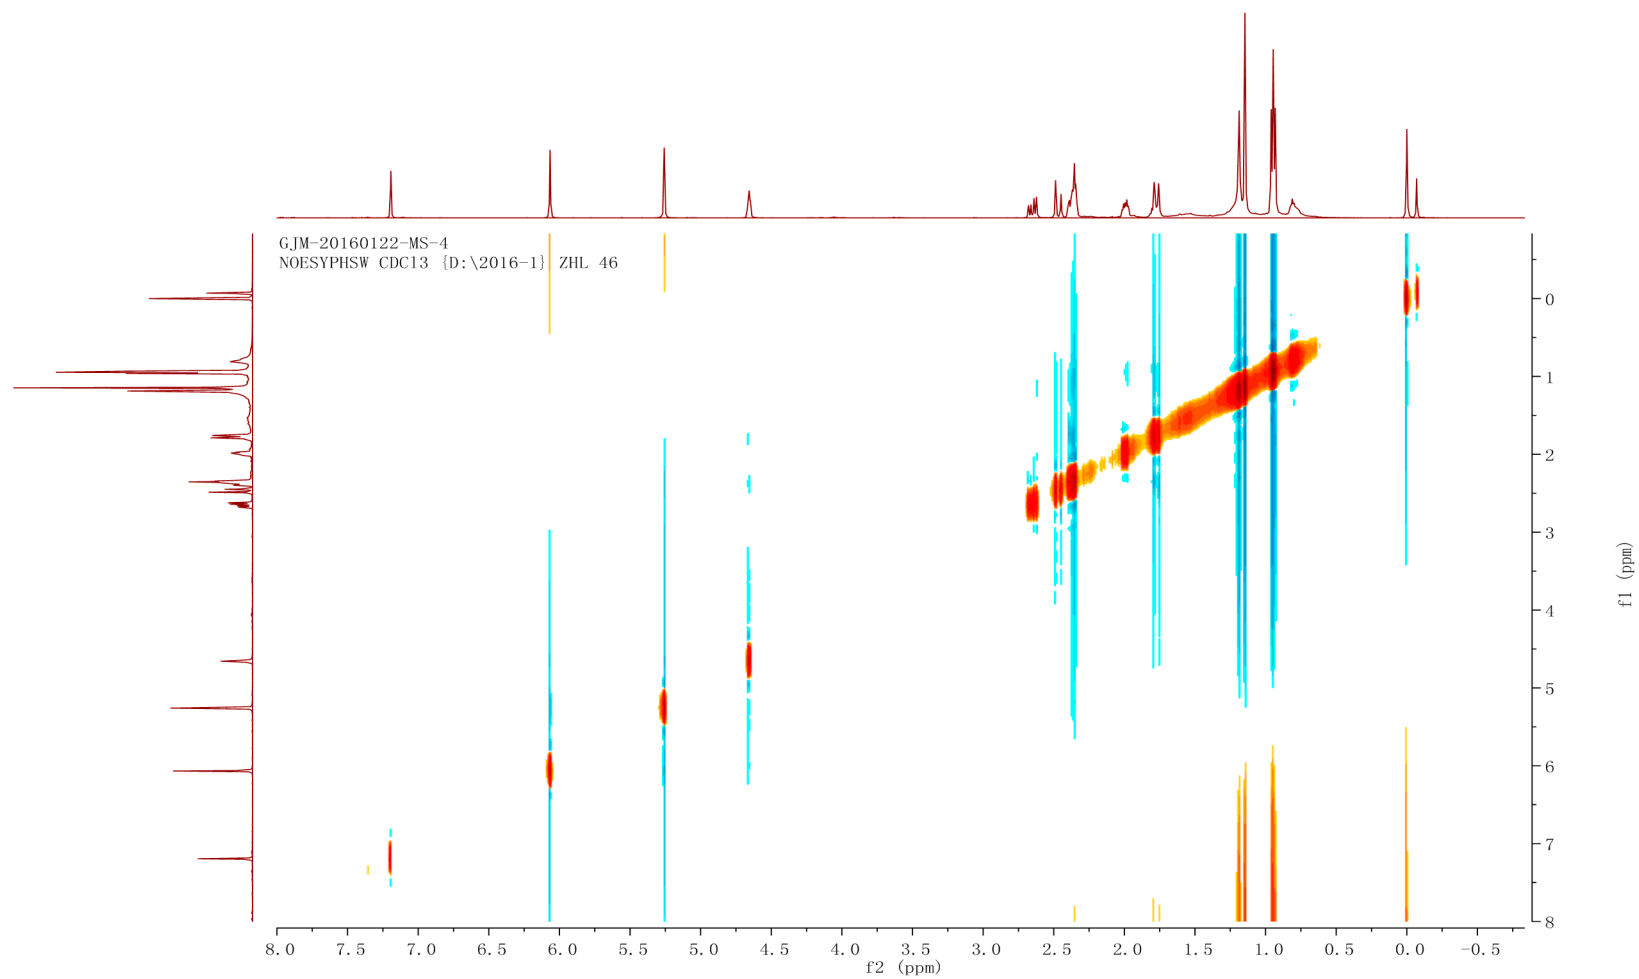

**Figure S42.** NOESY spectra of compound **1c** in CDCl<sub>3</sub>.

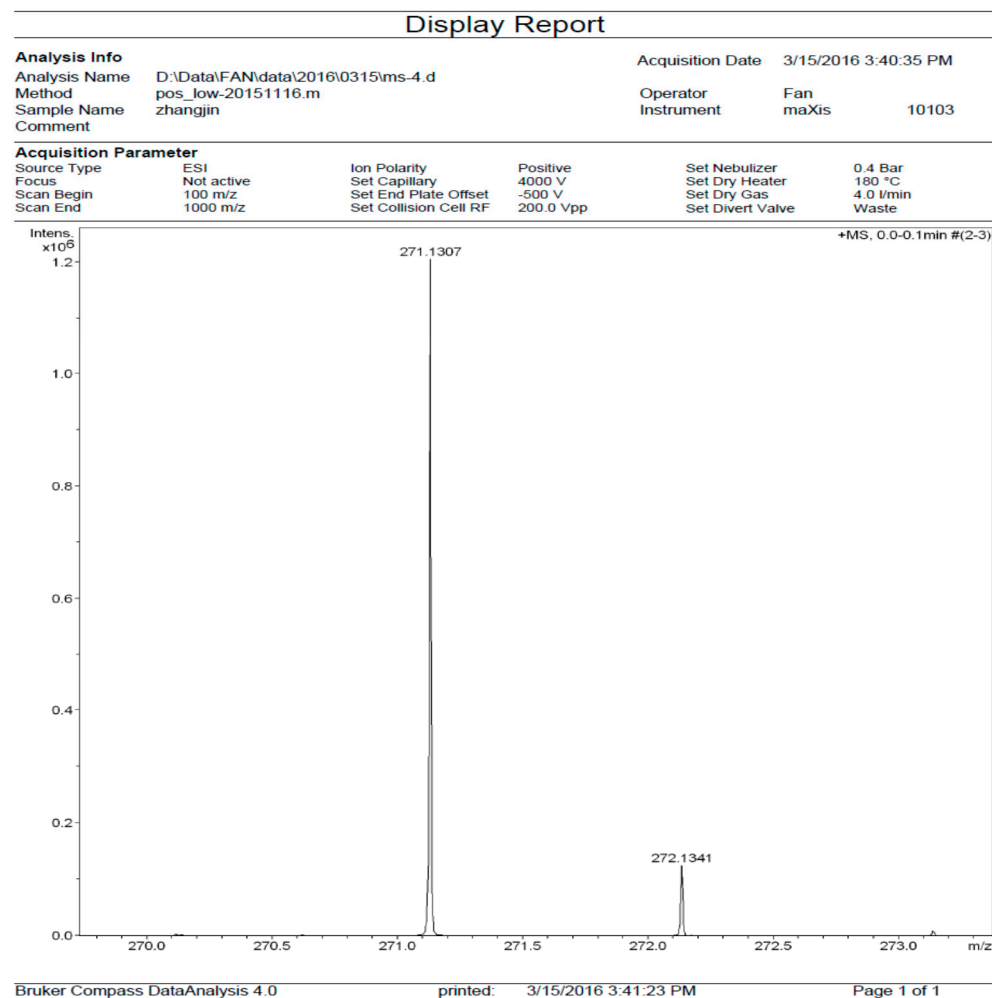

**Figure S43.** HRESIMS spectrum of compound **1c**.

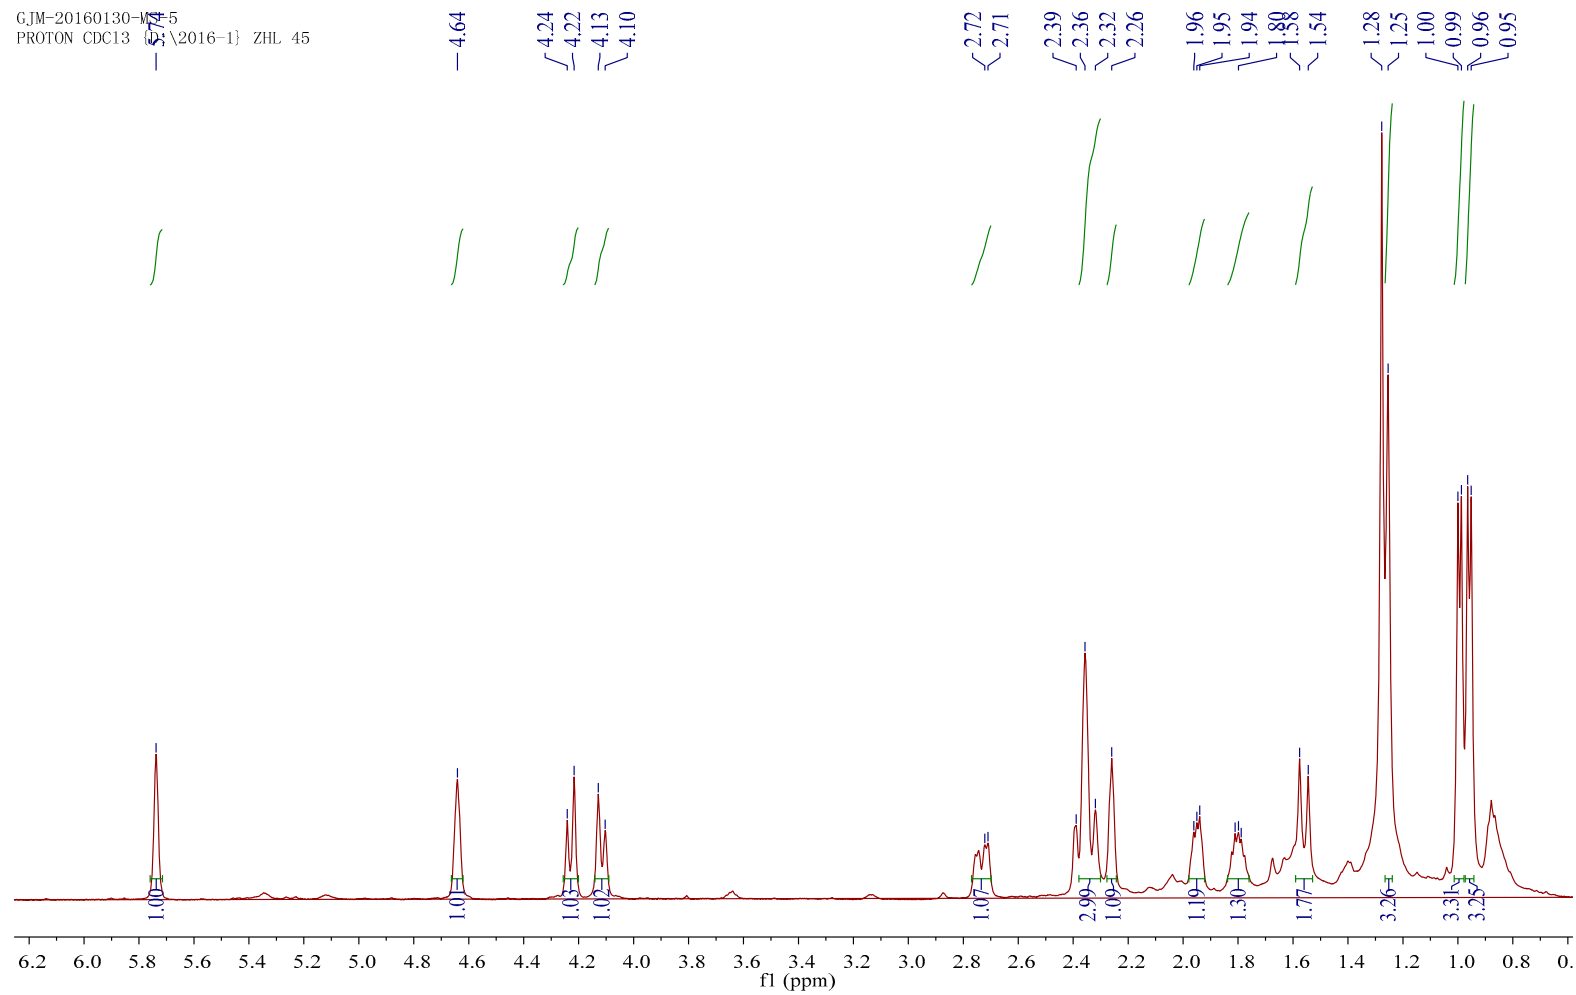

Figure S44.  $^1\text{H-NMR}$  spectra of compound **1d** in  $\text{CDCl}_3$ .

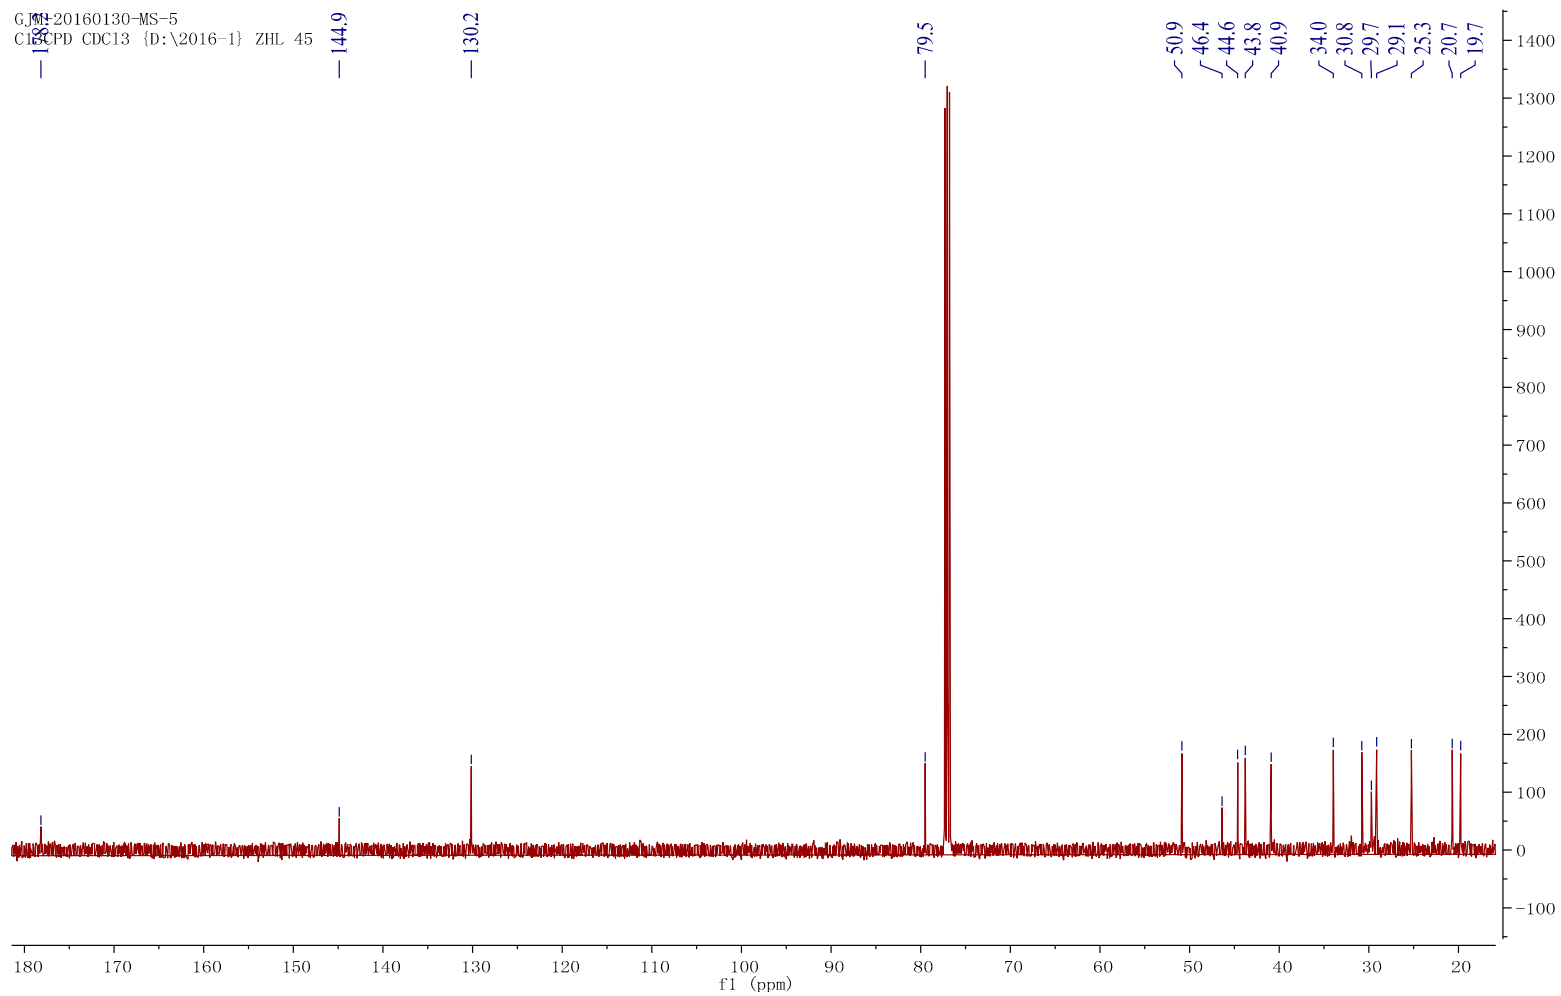

Figure S45. <sup>13</sup>C-NMR spectra of compound **1d** in CDCl<sub>3</sub>.

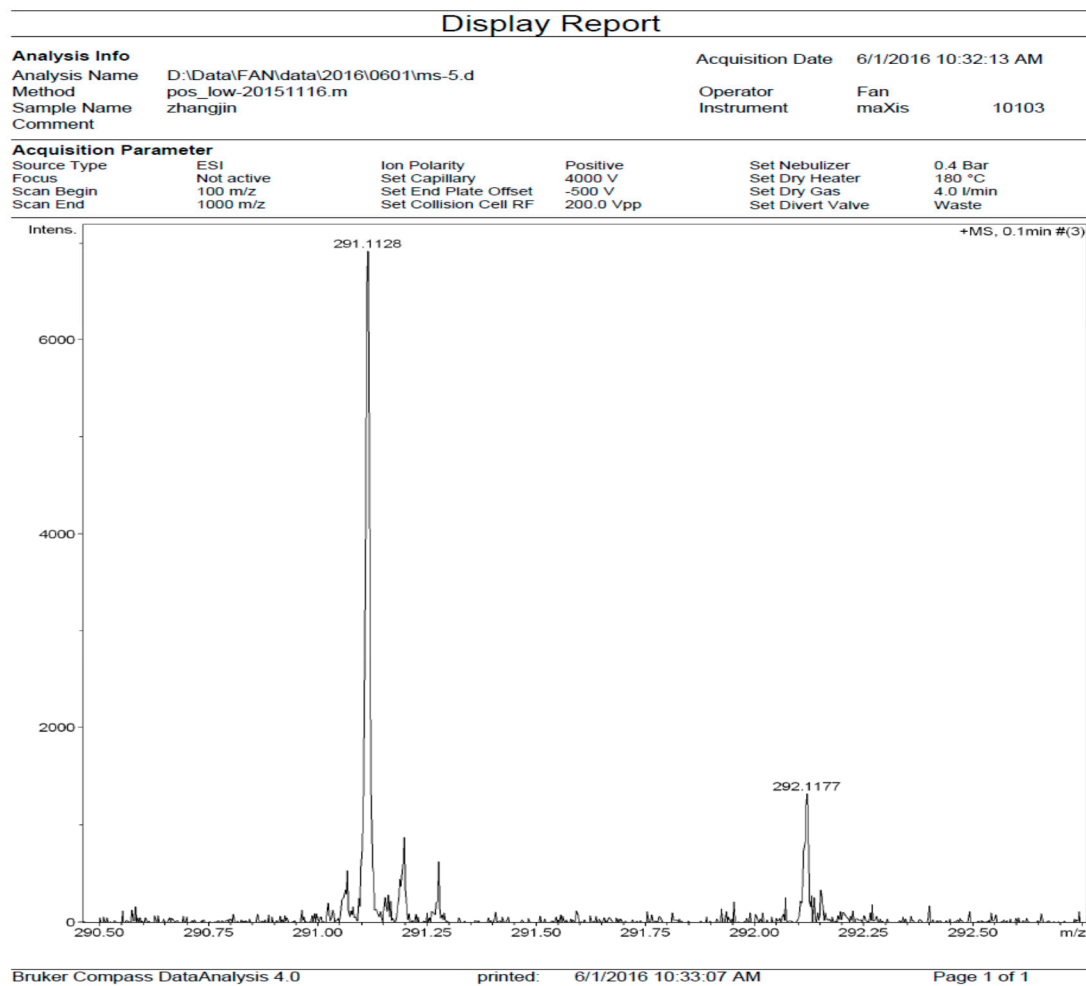

**Figure S46.** HRESIMS spectrum of compound **1d**.



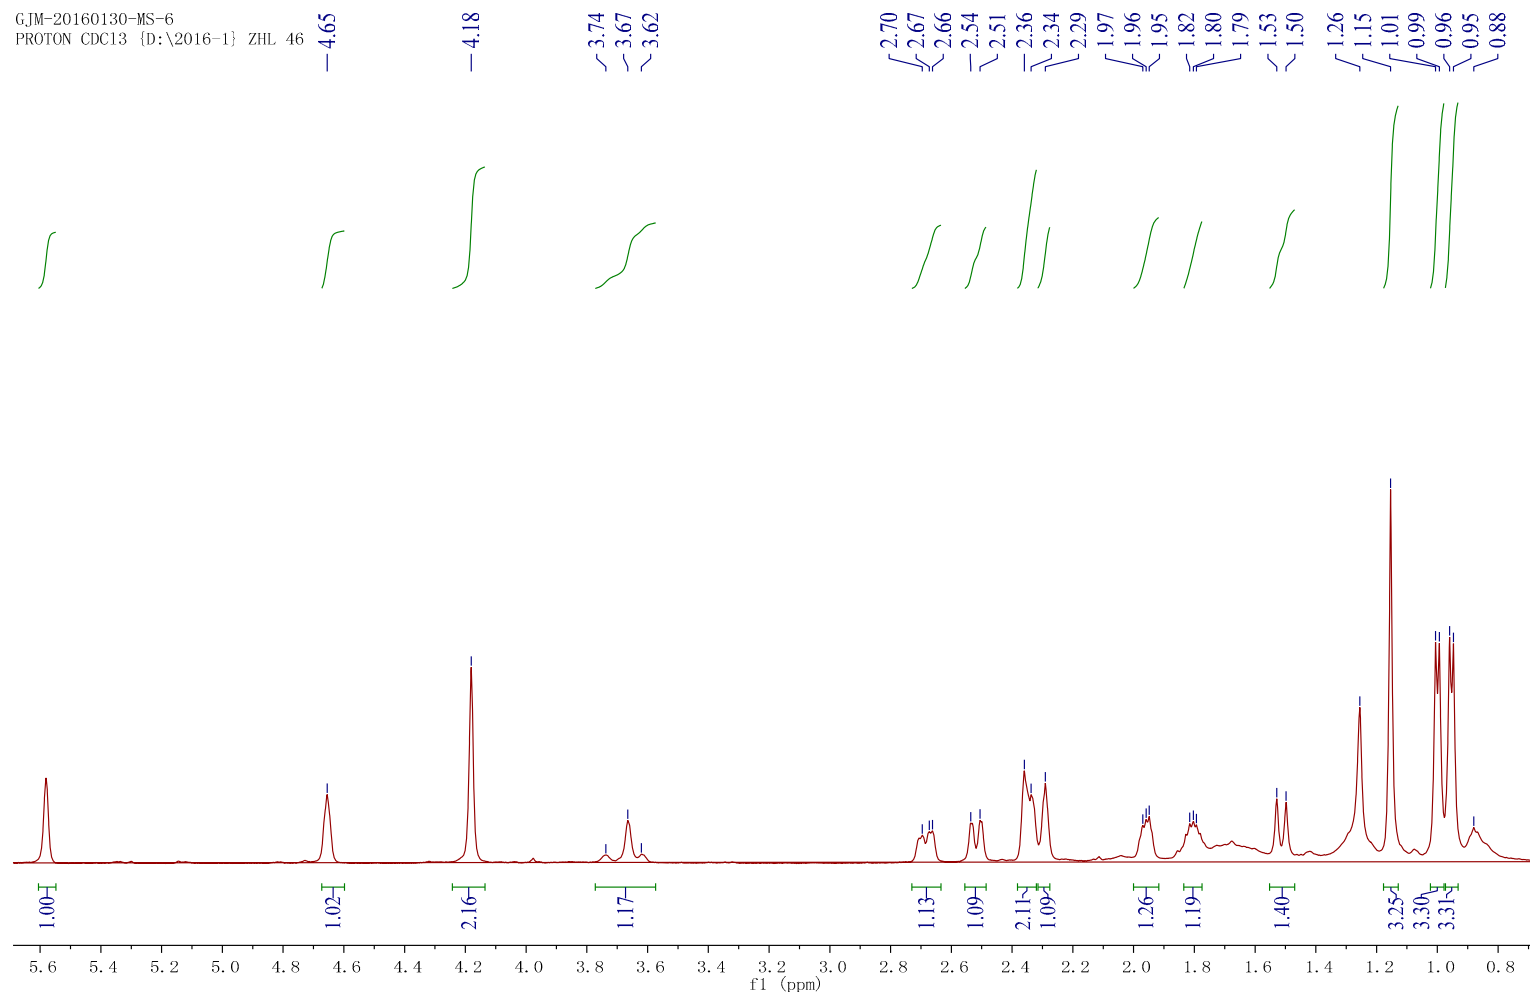

Figure S47.  $^1\text{H}$ -NMR spectra of compound **1e** in  $\text{CDCl}_3$ .

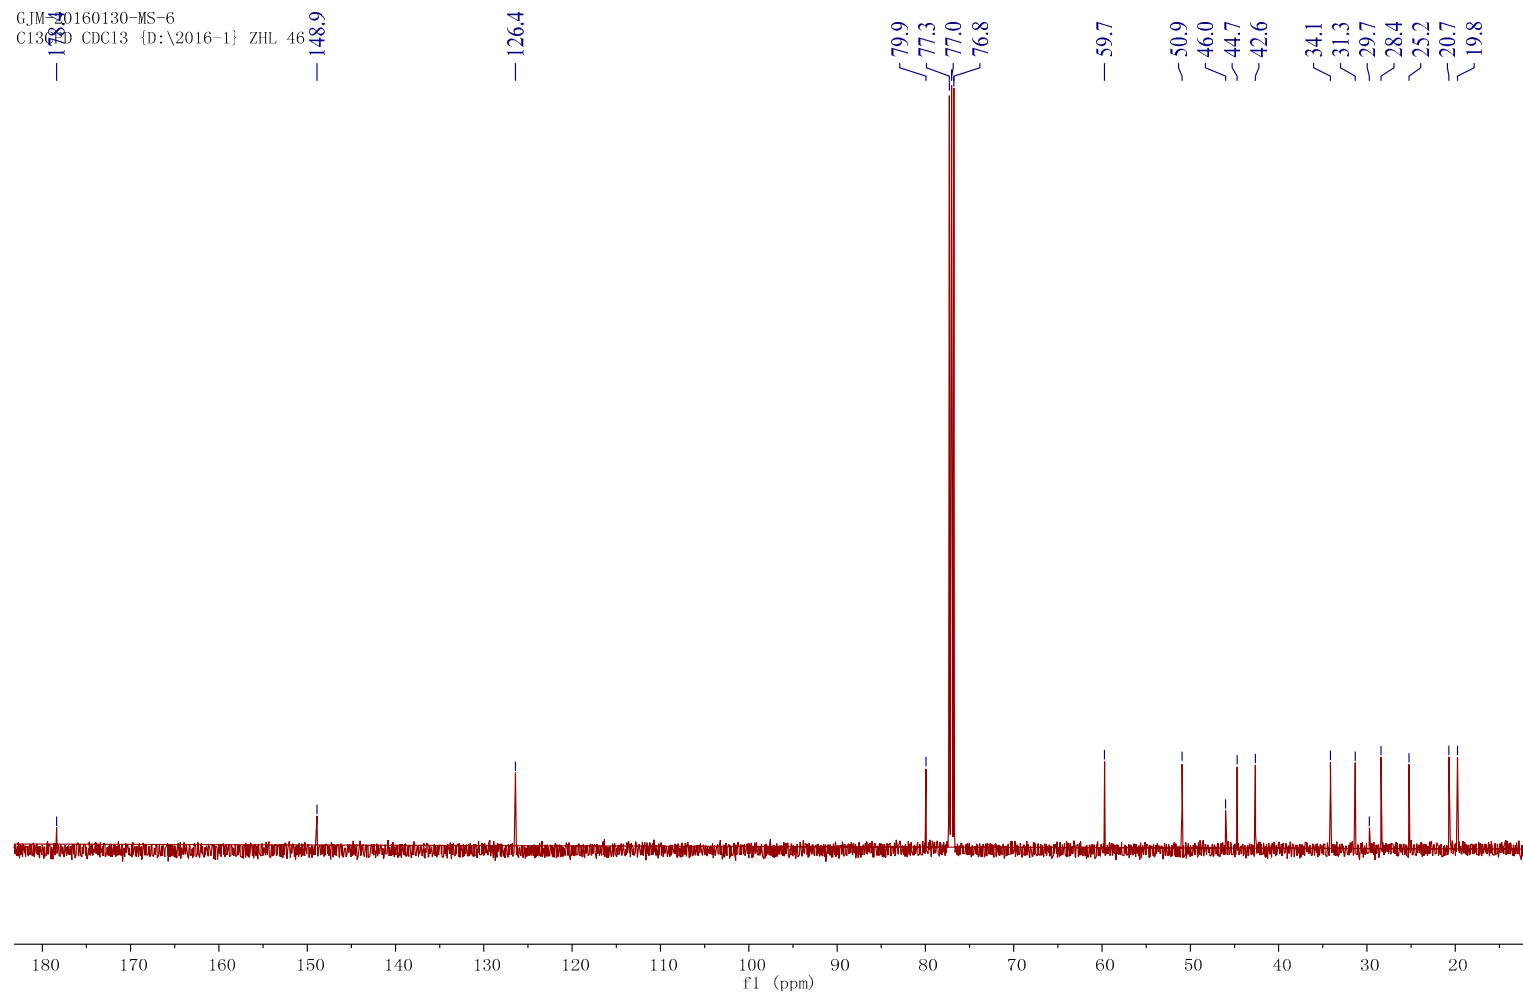

Figure S48.  $^{13}\text{C}$ -NMR spectra of compound **1e** in  $\text{CDCl}_3$ .

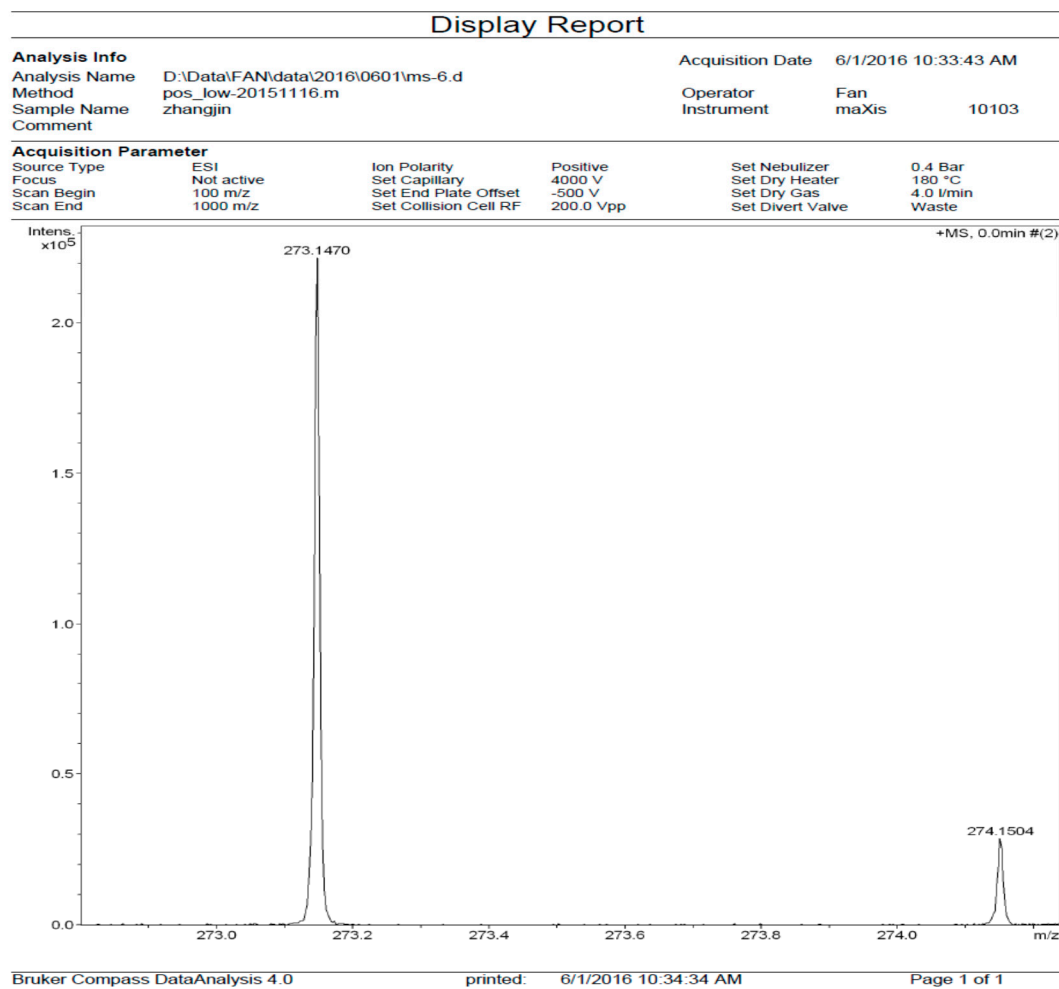

**Figure S49.** HRESIMS spectrum of compound **1e**.
